# Supplementary material for: A rational quest for selectivity through precise ligand-positioning in tandem DNA-catalysed Friedel–Crafts alkylation/asymmetric protonation
Source: Royal Society of Chemistry journal article supplement (doi:10.1039/c8sc05543b), 2019-01-01
Supplement: c8sc05543b1.pdf [file c8sc05543b1.pdf]

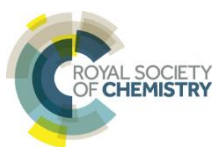

Supporting Information

**A rational quest for selectivity through precise ligand-positioning  
in the tandem DNA-catalysed Friedel-Crafts alkylation/  
asymmetric protonation**

Justine Mansot,<sup>‡,a</sup> Sidonie Aubert,<sup>‡,b</sup> Nicolas Duchemin,<sup>b</sup> Jean-Jacques Vasseur,<sup>a</sup>  
Stellios Arseniyadis,<sup>b,\*</sup> and Michael Smietana<sup>a,\*</sup>

<sup>a</sup> *Institut des biomolécules Max Mousseron, UMR 5287 CNRS, Université de Montpellier, ENSCM,  
Place Eugène Bataillon, 34095 Montpellier, France.*

<sup>b</sup> *School of Biological and Chemical Sciences, Queen Mary University of London, Joseph Priestley  
Building, Mile End Road, London E1 4NS, UK.*

<sup>‡</sup> *These authors have equally contributed*

## Table of contents

|                                                                                                                                           |           |
|-------------------------------------------------------------------------------------------------------------------------------------------|-----------|
| <b>I. General Information .....</b>                                                                                                       | <b>4</b>  |
| <b>II. Synthesis of modified dmbipy and phosphoramidite.....</b>                                                                          | <b>5</b>  |
| <b>III. DNA sequences .....</b>                                                                                                           | <b>10</b> |
| a. Synthesis .....                                                                                                                        | 10        |
| 1. Post-synthetic approach .....                                                                                                          | 10        |
| 2. Phosphoramidite approach.....                                                                                                          | 10        |
| b. HPLC and Mass Analysis .....                                                                                                           | 10        |
| 1. <b>ODN1</b> .....                                                                                                                      | 11        |
| 2. <b>ODN2</b> .....                                                                                                                      | 11        |
| 3. <b>ODN3</b> .....                                                                                                                      | 11        |
| 4. <b>ODN4</b> .....                                                                                                                      | 11        |
| 5. <b>ODN5</b> .....                                                                                                                      | 12        |
| 1. <b>ODN5/ODN4</b> .....                                                                                                                 | 13        |
| 2. <b>ODN1/ODN4</b> .....                                                                                                                 | 13        |
| 3. <b>ODN2/ODN3</b> .....                                                                                                                 | 13        |
| 4. <b>ODN3/ODN4</b> .....                                                                                                                 | 13        |
| <b>IV. Friedel-Crafts alkylation/protonation.....</b>                                                                                     | <b>14</b> |
| a. Synthesis of starting materials .....                                                                                                  | 14        |
| b. Preparation of racemic products.....                                                                                                   | 16        |
| c. Procedure of enantioselective Friedel-Crafts alkylation/protonation.....                                                               | 16        |
| 1. Preparation of a 200 mM MES buffer (pH 5.0).....                                                                                       | 16        |
| 2. Preparation of a 0.90 mM Cu(NO <sub>3</sub> ) <sub>2</sub> .dmbipy stock solution .....                                                | 16        |
| 3. Preparation of a 1.00 mM Cu(NO <sub>3</sub> ) <sub>2</sub> stock solution.....                                                         | 16        |
| 4. General procedure A. Enantioselective Friedel-Crafts alkylation/protonation, supramolecular approach with st-DNA.....                  | 16        |
| 5. General procedure B. Enantioselective Friedel-Crafts alkylation/protonation, supramolecular approach with <b>ODN5/ODN4</b> duplex..... | 17        |
| 6. General procedure C. Enantioselective Friedel-Crafts alkylation/protonation, covalent approach with <b>ODN1/ODN4</b> duplex.....       | 18        |
| 7. General procedure D. Enantioselective Friedel-Crafts alkylation/protonation, covalent approach with <b>ODN2/ODN4</b> duplex.....       | 18        |

|                                                                                                                                     |           |
|-------------------------------------------------------------------------------------------------------------------------------------|-----------|
| 8. General procedure E. Enantioselective Friedel-Crafts alkylation/protonation, covalent approach with <b>ODN3/ODN4</b> duplex..... | 19        |
| d. NMR description of racemate products, HPLC methods and results of enantioselective protonation reactions .....                   | 20        |
| <b>V. NMR of compounds .....</b>                                                                                                    | <b>35</b> |
| a. <sup>1</sup> H and <sup>13</sup> C NMR spectra for compound <b>3</b> .....                                                       | 35        |
| b. <sup>1</sup> H and <sup>13</sup> C NMR spectra of compound <b>4</b> .....                                                        | 36        |
| c. <sup>1</sup> H and <sup>13</sup> C NMR spectra for compound <b>5</b> .....                                                       | 37        |
| d. <sup>1</sup> H and <sup>13</sup> C NMR spectra for compound <b>6</b> .....                                                       | 38        |
| e. <sup>1</sup> H and <sup>13</sup> C NMR spectra of compound <b>14</b> .....                                                       | 39        |
| f. <sup>1</sup> H, <sup>13</sup> C and <sup>31</sup> P NMR spectra of compound <b>15</b> .....                                      | 40        |
| g. <sup>1</sup> H and <sup>13</sup> C spectra of compound <b>18e</b> .....                                                          | 42        |
| h. <sup>1</sup> H and <sup>13</sup> C NMR spectra of compound <b>18f</b> .....                                                      | 43        |
| i. <sup>1</sup> H, <sup>13</sup> C and <sup>19</sup> F NMR spectra of compound <b>18i</b> .....                                     | 44        |
| j. <sup>1</sup> H and <sup>13</sup> C NMR spectra of compound <b>18l</b> .....                                                      | 46        |
| <b>VI. Results of catalysis : HPLC chromatograms .....</b>                                                                          | <b>47</b> |
| a. HPLC chromatograms of compound <b>18a</b> .....                                                                                  | 47        |
| b. HPLC chromatograms of compound <b>18b</b> .....                                                                                  | 51        |
| c. HPLC chromatograms of compound <b>18c</b> .....                                                                                  | 55        |
| d. HPLC chromatograms of compound <b>18d</b> .....                                                                                  | 59        |
| e. HPLC chromatograms of compound <b>18e</b> .....                                                                                  | 63        |
| f. HPLC chromatograms of compound <b>18f</b> .....                                                                                  | 67        |
| g. HPLC chromatograms of compound <b>18g</b> .....                                                                                  | 71        |
| h. HPLC chromatograms of compound <b>18h</b> .....                                                                                  | 75        |
| i. HPLC chromatograms of compound <b>18i</b> .....                                                                                  | 79        |
| j. HPLC chromatograms of compound <b>18j</b> .....                                                                                  | 83        |
| k. HPLC chromatograms of compound <b>18k</b> .....                                                                                  | 87        |
| l. HPLC chromatograms of compound <b>18l</b> .....                                                                                  | 91        |
| m. HPLC chromatograms of compound <b>18m</b> .....                                                                                  | 95        |
| n. HPLC chromatograms of compound <b>18n</b> .....                                                                                  | 99        |
| o. HPLC chromatograms of compound <b>18o</b> .....                                                                                  | 103       |

## I. General Information

Pyridine, DIEA and diisopropylamine were distilled over calcium hydride. THF was distilled over sodium/benzophenone. All reactions were performed in anhydrous conditions under argon. 4,4'-Dimethyl-2,2'-bipyridine, 5-ethynyl-2'-deoxyuridine, 2'-propargyl-deoxyuridine and 2,2'-anydrodeoxyuridine were purchased from Alfa and Carbosynth. Phosphoramidite precursors were purchased from Eurogentech.

Thin-layer chromatographies (TLC) were performed on silica plate 60 F254 Merck and the different spots were revealed under  $\lambda$  illumination at 254 nm. Silica gel purifications were carried out with 0.040-0.063 mm silica from Merck.

NMR experiments were accomplished on a Bruker DRX 600 spectrometer, 400 spectrometer or 300 spectrometer at 20 °C in CDCl<sub>3</sub>. The <sup>1</sup>H NMR spectra are described as follow: chemical shifts expressed in  $\delta$  (ppm) values (part per million) and internal standard of residual CHCl<sub>3</sub> was fixed at 7.26 ppm. Multiplicity (br = broad, s = singlet, d = doublet, t = triplet, q = quartet, quint. = quintuplet, m = multiplet), coupling constant *J* (Hz) and integration.

The syntheses of the oligonucleotides were performed on solid support using an automated DNA synthesizer (Applied Biosystems 394). Crude oligonucleotides were analysed by RP-HPLC (Macherey-Nagel Nucleodur C-18, 100 Å, 8 x 125 mm, Buffer A: 50 mM TEAAc in 0.2% CH<sub>3</sub>CN, Buffer B: 50 mM TEEAc in 80% CH<sub>3</sub>CN, 2 mL/min flow rate, detection at 260 nm) and purified by flash chromatography (interchim column PF-15C18HQ-F0025, 15 mL/min flow rate, detection at 260 nm and  $\lambda$  scan 200-600 nm). Oligonucleotides were desalted using a dialysis membrane Float-A-Lyzer G2 Dialysis Device CE, Biotech CE, 0.5-1.0 kD MWCO, 1 mL, and transferred to a 2 mL Eppendorf-vial and lyophilized from water.

MALDI-TOF mass spectra were recorded on a Shimadzu Alliance using 2,4,6-trihydroxyacetophenone as a saturated solution in a mixture of acetonitrile/0.1M ammonium citrate solution (1:1, v/v) for the matrix. Analytical samples were mixed with the matrix in a 1:5 (v/v) ratio, crystallized on a 100-well stainless steel plate and analysed.

*T<sub>m</sub>* experiments were performed on a Varian Cary 300 Bio  $\lambda$ /Visible spectrometer by measuring absorbance at 260 nm. Oligonucleotides were diluted in 20 mM cacodylate buffer with 100 mM NaCl.

All the *e<sub>s</sub>* were determined by HPLC using a chiral column (Chiralpak IA and IB). The sign before the *e<sub>e</sub>* values is arbitrarily attributed.

## II. Synthesis of modified dmbipy and phosphoramidite

### 4-Methyl-4'-ethyltosylate-2,2'-bipyridine (3)

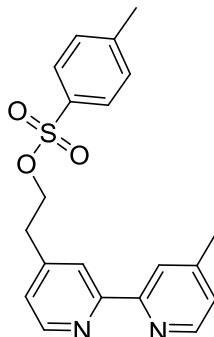

Under argon, a round-bottom flask was charged with 4-methyl-4'-hydroxyethyl-2,2'-bipyridine **2** synthesized as described in literature<sup>1</sup> (400 mg, 1.87 mmol), pyridine (1.30 mL, 14.9 mmol) in anhydrous dichloromethane (16.0 mL). The reaction was stirred overnight and after completion monitored by TLC, the mixture was diluted in 15.0 mL of ether. The organic phase was washed with 10.0 mL of water and neutralised with 10.0 mL of saturated NaHCO<sub>3</sub> solution. The aqueous phase was extracted with ether (3 x 20.0 mL) and the resulting organic layers were dried over anhydrous Na<sub>2</sub>SO<sub>4</sub> and concentrated in vacuum. The crude product was purified by silica gel chromatography (0-100% EtOAc, cyclohexane, 4% of Et<sub>3</sub>N) to afford product **3** as a yellow oil with 57% yield (255 mg, 1.07 mmol) *R<sub>f</sub>* 0.40 (Cyclohexane EtOAc 3:7 with 4% Et<sub>3</sub>N). <sup>1</sup>H NMR (300 MHz, CDCl<sub>3</sub>) δ 8.53 (t, *J* = 5.7 Hz, 2H), 8.24 (s, 1H), 8.15 (s, 1H), 7.71-7.61 (m, 2H), 7.21 (d, *J* = 8.0 Hz, 2H), 7.17 (dd, *J* = 5.0, 0.9 Hz, 1H), 7.10 (dd, *J* = 5.0, 1.7 Hz, 1H), 4.31 (t, *J* = 6.6 Hz, 2H), 3.03 (t, *J* = 6.6 Hz, 2H), 2.45 (s, 3H), 2.32 (s, 3H). <sup>13</sup>C NMR (75 MHz, CDCl<sub>3</sub>) δ 155.4, 154.8, 149.6, 149.3, 148.2, 147.0, 144.9, 132.6, 129.9, 128.9, 127.9, 126.1, 125.2, 124.7, 122.5, 121.8, 69.3, 34.9, 29.8, 21.6. HRMS-ESI *m/z* 369.1276 ([M+H]<sup>+</sup> C<sub>20</sub>H<sub>21</sub>N<sub>2</sub>O<sub>3</sub>S calcd 369.1273).

#### 4-Methyl-4'-azidoethyl-2,2'-bipyridine (4)

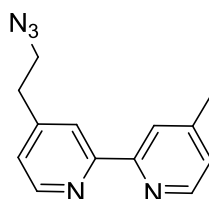

To a round-bottom flask filled with dry DMF (6.00 mL), was added 4-methyl-4'-ethyltosylate-2,2'-bipyridine **3** (230 mg, 0.63 mmol) and sodium azide (49.0 mg, 0.75 mmol). The reaction was stirred for 2 h at 0 °C. After total consumption of the starting material, the mixture was diluted in EtOAc (15.0 mL), washed with water (10.0 mL) and with a saturated NaCl solution. The aqueous phase was extracted with EtOAc (3 x 15.0 mL) and the organic layers were dried over anhydrous Na<sub>2</sub>SO<sub>4</sub> before evaporation of solvent. The crude material was purified by silica gel chromatography (Cyclohexane/EtOAc 0-100%, 4% of Et<sub>3</sub>N) to afford product **4** as a yellow oil with 85% yield (127 mg, 0.53 mmol) *R*<sub>f</sub> 0.40 (Cyclohexane EtOAc 8:2 with 4% Et<sub>3</sub>N). **<sup>1</sup>H NMR (300 MHz, CDCl<sub>3</sub>)** δ 8.57 (dd, *J* = 21.3, 4.5 Hz, 2H), 8.26 (d, *J* = 12.4 Hz, 2H), 7.16 (dd, *J* = 11.4, 4.6 Hz, 2H), 3.62 (t, *J* = 6.9 Hz, 2H), 2.97 (t, *J* = 7.0 Hz, 2H), 2.44 (s, 3H). **<sup>13</sup>C NMR (75 MHz, CDCl<sub>3</sub>)** δ 156.6, 155.7, 149.4, 149.0, 148.4, 148.2, 125.0, 124.2, 122.2, 121.5, 51.4, 35.0, 21.3. **HRMS-ESI *m/z*** 240.1253 ([M+H]<sup>+</sup> C<sub>13</sub>H<sub>14</sub>N<sub>5</sub> calcd 240.1249).

#### 4-Methyl-4'-(4''-(trimethylsilyl)-but-3''-ynyl)-2,2'-bipyridine (5)

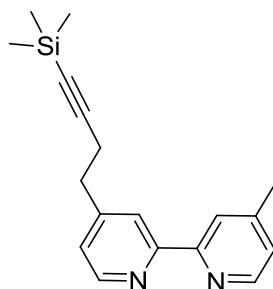

To a solution of diisopropylamine (1.40 mL, 8.00 mmol) in dry THF (6.70 mL) was added dropwise a solution of *n*-BuLi (1.80 M solution in hexane, 1.70 mL, 3.00 mmol) and the reaction mixture was stirred for 30 min at -78 °C. Commercially available 2,2'-dimethyl-4,4'-bipyridine **1** (1.00 g, 5.5 mmol) in dry THF (40.0 mL) was added dropwise and the black mixture was stirred for another 2 h. Trimethylsilylpropargyl bromide (2.00 mL, 12.2 mmol) in dry THF (33.0 mL) was added dropwise and stirred for 1 h at -78 °C, and then allowed to reach room temperature in 1 h. The colour of anion disappeared, and the mixture turned yellow. The excess LDA was quenched with water

(20.0 mL) and the aqueous phase was extracted with EtOAc (3 × 30.0 ml). The organics layers were washed with brine (10.0 mL) and dried over magnesium sulphate. Evaporation of the solvent gave an orange oil which was purified on reverse phase silica gel column chromatography with water/acetonitrile (0-100%) to afford **5** as a white powder with 46% yield (736 mg, 2.50 mmol).  $R_f$  0.20 (H<sub>2</sub>O Acetonitrile 5:5). **<sup>1</sup>H NMR (300 MHz, CDCl<sub>3</sub>)** δ 8.54 (dd,  $J$  = 15.1, 5.0 Hz, 2H), 8.24 (d,  $J$  = 16.2 Hz, 2H), 7.26-7.10 (m, 2H), 2.89 (t,  $J$  = 7.3 Hz, 2H), 2.57 (t,  $J$  = 7.3 Hz, 2H), 2.42 (s, 3H), 0.11 (m, 9H). **<sup>13</sup>C NMR (75 MHz, CDCl<sub>3</sub>)** δ 156.3, 156.0, 150.4, 149.0, 149.0, 148.2, 124.7, 124.1, 122.0, 121.5, 105.6, 86.2, 53.5, 34.4, 21.2, 21.1, 0.1. **HRMS-ESI**  $m/z$  295.1630 ([M+H]<sup>+</sup> C<sub>18</sub>H<sub>24</sub>N<sub>2</sub>Si calcd 295.1631).

#### 4-Methyl-4'-(but-3''-ynyl)-2,2'-bipyridine (**6**)

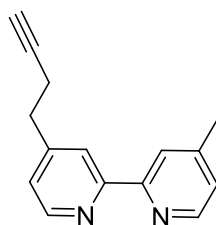

To a stirred solution of trimethylsilyl-protected compound **5** (700 mg, 2.37 mmol) in CH<sub>3</sub>OH/THF (1:1) was added KF (700 mg, 12.0 mmol) as a solid. After complete consumption of the starting material (ca. 20 h), the solution was concentrated in vacuum. Dichloromethane was added to the white crude product and the resulting solution was filtered through silica gel. The solvent was evaporated to afford compound **6** as a white solid powder with 98% yield (515 mg, 2.32 mmol)  $R_f$  0.39 (Cyclohexane/EtOAc = 9:1 with 4% Et<sub>3</sub>N). **<sup>1</sup>H NMR (300 MHz, CDCl<sub>3</sub>)** δ 8.57 (dd,  $J$  = 16.5, 5.0 Hz, 2H), 8.27 (d,  $J$  = 12.8 Hz, 2H), 7.23-7.14 (m, 2H), 2.93 (t,  $J$  = 7.4 Hz, 2H), 2.58 (td,  $J$  = 7.4, 2.6 Hz, 2H), 2.44 (s, 3H), 1.98 (t,  $J$  = 2.6 Hz, 1H). **<sup>13</sup>C NMR (75 MHz, CDCl<sub>3</sub>)** δ 156.3, 155.8, 150.3, 149.2, 148.9, 148.4, 124.8, 123.9, 122.2, 121.3, 82.9, 69.6, 34.3, 21.3, 19.5. **HRMS-ESI**  $m/z$  223.1235 ([M+H]<sup>+</sup> C<sub>15</sub>H<sub>15</sub>N<sub>2</sub> calcd 223.1235).

**5'-O-(4,4'-Dimethoxytrityl)-2'-Deoxy-2'-(4'-ethyl-(4-méthyl-2,2'-bipyridine)-1,2,3-triazol-1-yl)uridine (14)**

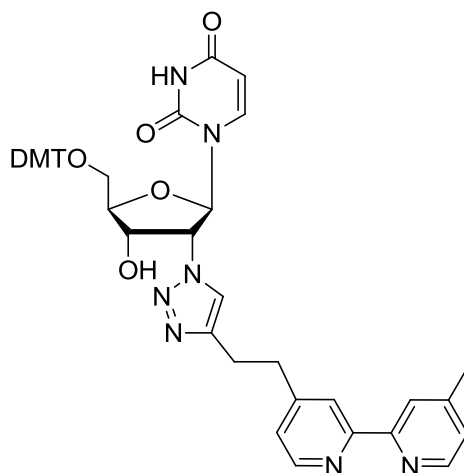

In a degassed solution of THF:H<sub>2</sub>O:pyridine (6:3:2, 20.0 mL) under argon, 2'-Azido-5'-O-(4,4'-dimethoxytrityl)-2'-deoxyuridine **13** synthesized as described in the literature (990 mg, 1.73 mmol), and 4-methyl-4'-(4''-(trimethylsilyl)-but-3''-ynyl)-2,2'-bipyridine **6** (500 mg, 2.25 mmol) were dissolved. A degassed solution of sodium ascorbate (139 mg, 0.69 mmol) and CuSO<sub>4</sub>·5H<sub>2</sub>O (86 mg, 0.35 mmol) in water (3.00 mL) was added, and the reaction mixture was stirred at room temperature for 30 min. The reaction mixture was concentrated to 2 mL and then diluted with CH<sub>2</sub>Cl<sub>2</sub> (40.0 mL), and the mixture was washed with a saturated aqueous solution of NaHCO<sub>3</sub> (20.0 mL). The aqueous phase was extracted with CH<sub>2</sub>Cl<sub>2</sub> (3 × 20.0 mL) and the combined organic phases were dried under anhydrous Na<sub>2</sub>SO<sub>4</sub>. The resulting organic phase was concentrated to obtain a crude yellow oil which was purified by silica gel column chromatography: Cyclohexane-EtOAc (0-100%) and EtOAc-MeOH (0-50%) with 4% Et<sub>3</sub>N to afford the product **14** as a yellow foam with 69% yield (882 mg, 1.19 mmol). *R<sub>f</sub>* 0.30 (EtOAc with 4% Et<sub>3</sub>N). <sup>1</sup>H NMR (300 MHz, CDCl<sub>3</sub>) δ 8.57 (d, *J* = 4.9 Hz, 1H), 8.25-8.09 (m, 2H), 7.75 (d, *J* = 8.2 Hz, 1H), 7.67 (s, 1H), 7.47 (s, 1H), 7.40 (d, *J* = 7.2 Hz, 2H), 7.35-7.17 (m, 11H), 7.03 (d, *J* = 4.6 Hz, 1H), 6.84 (d, *J* = 8.6 Hz, 4H), 6.58 (d, *J* = 7.4 Hz, 1H), 5.45 (d, *J* = 8.2 Hz, 1H), 5.36-5.19 (m, 1H), 4.66-4.50 (m, 1H), 4.43 (d, *J* = 2.8 Hz, 1H), 3.78 (s, 6H), 3.56 (qd, *J* = 11.0, 2.8 Hz, 2H), 3.32-2.87 (m, 4H), 2.43 (s, 3H), 2.00 (s, 1H). <sup>13</sup>C NMR (101 MHz, CDCl<sub>3</sub>) δ 162.5, 158.9, 156.3, 155.1, 150.8, 150.3, 149.6, 149.4, 147.9, 145.8, 144.2, 139.3, 135.2, 135.1, 130.2, 128.2, 127.3, 124.9, 124.6, 123.5, 123.5, 113.5, 103.4, 87.5, 85.6, 71.0, 65.9, 63.0, 55.4, 35.6, 34.6, 29.8, 26.9, 21.3, 14.9. HRMS-ESI *m/z* 794.3303 ([M+H]<sup>+</sup> C<sub>45</sub>H<sub>45</sub>N<sub>7</sub>O<sub>7</sub> calcd 794.3302).



**3'-O-(2-Cyanoethoxy(diisopropylamino)phosphinyl)-5'-O-(4,4'-dimethoxytrityl)-2'-Deoxy-2'-(4'-ethyl-(4-méthyl-2,2'-bipyridine)-1,2,3-triazol-1-yl)uridine (15)**

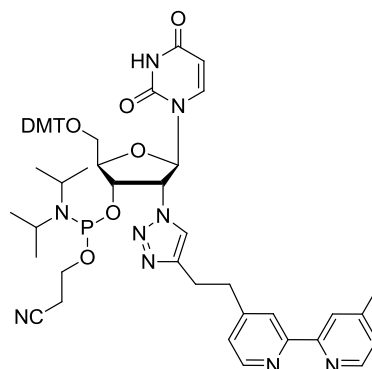

Under argon, diisopropylethylamine (0.70 mL, 3.21 mmol) was added to a solution of **14** (850 mg, 1.07 mmol) in dry  $\text{CH}_2\text{Cl}_2$  (20.0 mL). Then 2-cyanoethyl-*N,N*-diisopropylchlorophosphoramidite (954 mg, 4.28 mmol) was added. After stirring for 2 h at room temperature, EtOAc previously washed with saturated aqueous  $\text{NaHCO}_3$  solution was added (50.0 mL) and the reaction mixture was washed with 30.0 mL of solution  $\text{NaCl}/\text{NaHCO}_3$  (1/1 v/v). The aqueous phase was extracted with EtOAc (3 x 20.0 mL) and the organic layer was dried over  $\text{Na}_2\text{SO}_4$  and concentrated under reduced pressure. The crude product was purified by silica gel column chromatography with cyclohexane-EtOAc (0-100%) and EtOAc-MeOH (0-50%) containing 10%  $\text{Et}_3\text{N}$ . The desired phosphoramidite **15** was obtained as white foam with 84% yield (883 mg, 0.89 mmol).  $R_f = 0.45$  (4% MeOH in EtOAc with adding of 10%  $\text{Et}_3\text{N}$ ).  $^1\text{H NMR}$  (300 MHz,  $\text{CDCl}_3$ )  $\delta$  8.64-8.45 (m, 2H), 8.31-8.15 (m, 2H), 7.89 (dd,  $J = 42.0, 8.2$  Hz, 1H), 7.60 (s, 1H), 7.42 (d,  $J = 7.8$  Hz, 2H), 7.37-7.20 (m, 9H), 7.16 (dd,  $J = 17.4, 4.1$  Hz, 2H), 6.85 (t,  $J = 6.7$  Hz, 4H), 6.47 (dd,  $J = 41.6, 5.1$  Hz, 1H), 5.64-5.25 (m, 2H), 5.03-4.50 (m, 2H), 3.79 (d,  $J = 2.7$  Hz, 6H), 3.75-3.14 (m, 7H), 3.14-3.00 (m, 6H), 2.59 (t,  $J = 5.9$  Hz, 1H), 2.43 (s, 3H), 2.06-1.93 (m, 7H), 1.39-1.21 (m, 6H), 1.17-0.97 (m, 7H), 0.90 (dd,  $J = 13.3, 6.7$  Hz, 6H).  $^{31}\text{P NMR}$  (121 MHz,  $\text{CDCl}_3$ )  $\delta$  151.57, 150.39.  $^{13}\text{C NMR}$  (126 MHz,  $\text{CDCl}_3$ )  $\delta$  175.1, 163.2, 162.7, 158.9, 158.8, 158.8, 156.4, 156.0, 156.0, 151.2, 151.2, 150.4, 150.3, 149.3, 149.3, 149.0, 148.3, 146.4, 146.0, 144.2, 144.1, 139.7, 139.2, 135.2, 135.0, 130.3, 130.2, 128.3, 128.2, 128.1, 127.4, 127.2, 124.8, 124.0, 123.9, 123.6, 122.6, 122.3, 122.2, 121.4, 121.4, 118.0, 117.4, 113.5, 113.4, 103.3, 102.6, 88.1, 87.5, 87.2, 85.8, 84.8, 72.6, 72.5, 70.9, 70.7, 66.2, 62.4, 60.8, 58.1, 57.9, 57.9, 57.8, 55.4, 55.3, 46.8, 46.8, 45.5, 43.3, 43.3, 35.2, 35.0, 29.8, 26.6, 26.4, 26.4, 24.6, 24.5, 24.4, 24.4, 23.0, 22.6, 21.6, 21.3, 20.6, 20.5, 20.4, 20.3, 19.3, 19.3, 14.9, 8.6, 2.0. HRMS-ESI  $m/z$  994.4381 ( $[\text{M}+\text{H}]^+$   $\text{C}_{54}\text{H}_{61}\text{N}_9\text{O}_8\text{P}$  calcd 994.4381).

### III. DNA sequences

#### a. Synthesis

##### 1. *Post-synthetic approach*

Commercial phosphoramidites **7** and **10** were incorporated with 5 min time coupling (0.1 M) to synthesize **ODN1** and **ODN2**. After synthesis of these modified oligonucleotide bearing an alkyne function, CPG beads were washed with a 0.2 M solution of sodium bisulfite (3 x 1 mL), water (3 x 2 mL), anhydrous acetonitrile (3 x 2 mL) and then dried by nitrogen flushing. To the solid-supported oligonucleotide (1  $\mu$ mol) were added azido dmbipy **4** (2 equiv, 2  $\mu$ mol, 20  $\mu$ L of a 0.1 M solution in dioxane), freshly prepared CuSO<sub>4</sub> (1 equiv, 1  $\mu$ mol, 25  $\mu$ L of a 0.04 M solution in degassed H<sub>2</sub>O), freshly prepared sodium ascorbate (5 equiv, 5  $\mu$ mol, 50  $\mu$ L of a 0.1 M solution in degassed H<sub>2</sub>O), THPTA (3 equiv, 3  $\mu$ mol, 30  $\mu$ L of a 0.1 M solution), and dioxane (20  $\mu$ L). The resulting preparation was treated with microwave for 1h30 in a sealed vessel. The solution was removed by filtration, and the CPG beads were washed with dioxane, water, saturated EDTA acid solution, water, and acetonitrile (2 mL each).

##### 2. *Phosphoramidite approach*

Commercial phosphoramidites **7** and **10** were incorporated with 5 min simple coupling (0.1 M) to synthesize **ODN1** and **ODN2**.

Modified phosphoramidite **15** was incorporated with 2 x 20 min time coupling (0.2M) to synthesize **ODN3**.

#### b. HPLC and Mass Analysis

| Entry | Name        | Calcd   | Found   |
|-------|-------------|---------|---------|
| 1     | <b>ODN1</b> | 3880.81 | 3880.26 |
| 2     | <b>ODN2</b> | 3910.29 | 3910.45 |
| 3     | <b>ODN3</b> | 3880.81 | 3881.22 |
| 4     | <b>ODN4</b> | 3661.37 | 3661.93 |
| 5     | <b>ODN5</b> | 3630.13 | 3630.42 |

### 1. ODN1

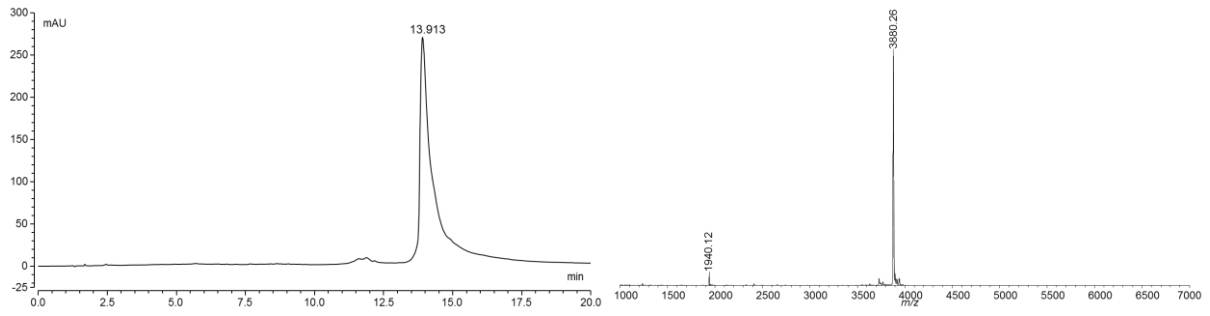

### 2. ODN2

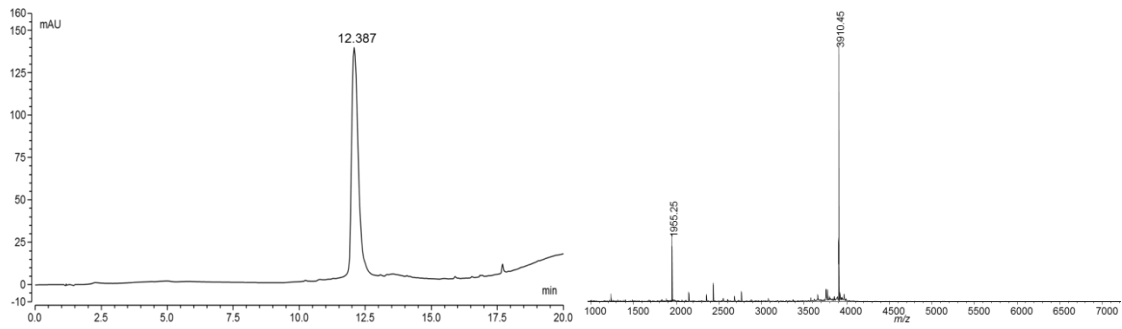

### 3. ODN3

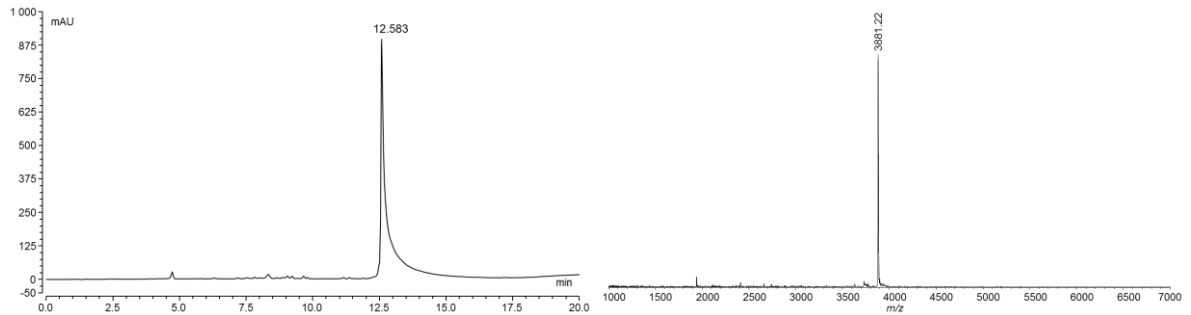

### 4. ODN4

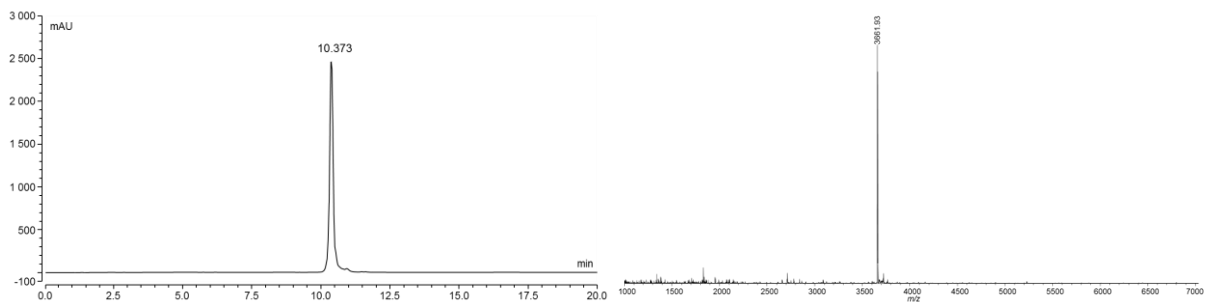

## 5. ODN5

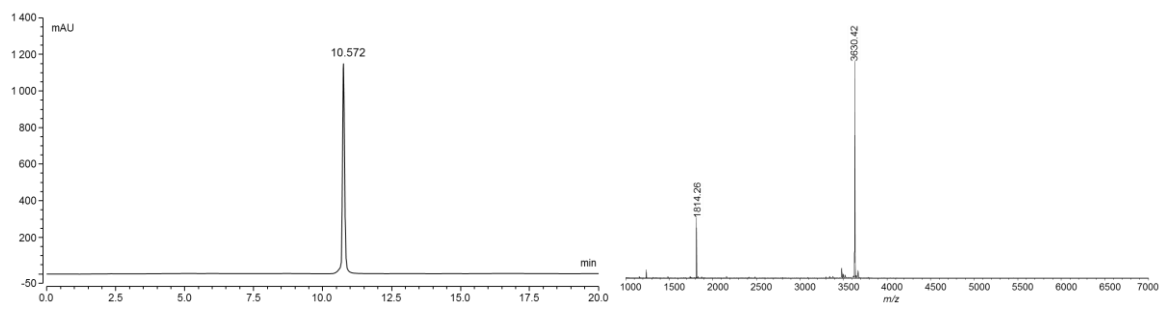

## c. Melting temperature

### 1. ODN5/ODN4

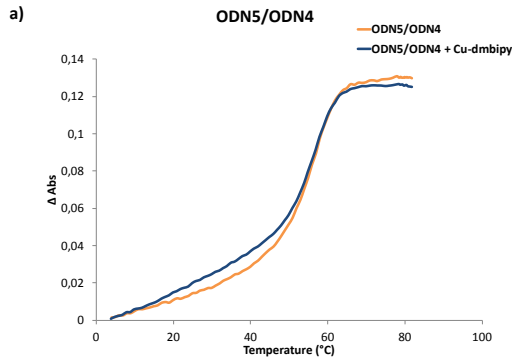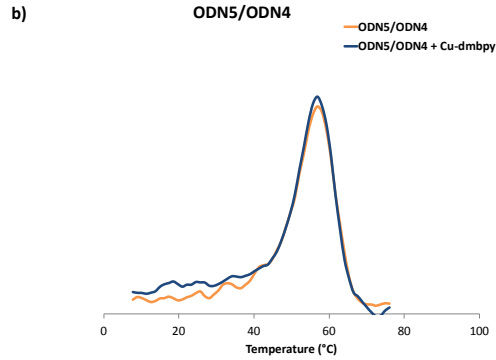

### 2. ODN1/ODN4

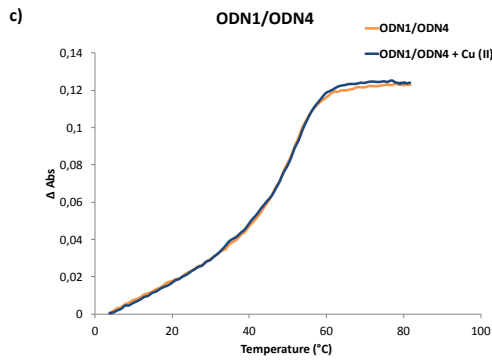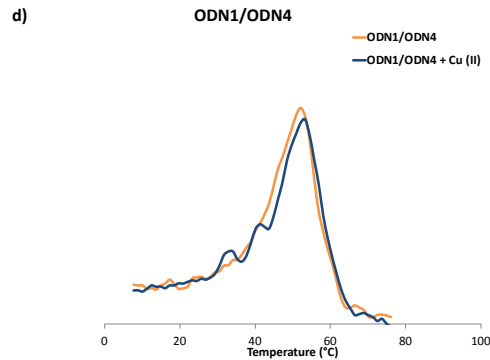

### 3. ODN2/ODN3

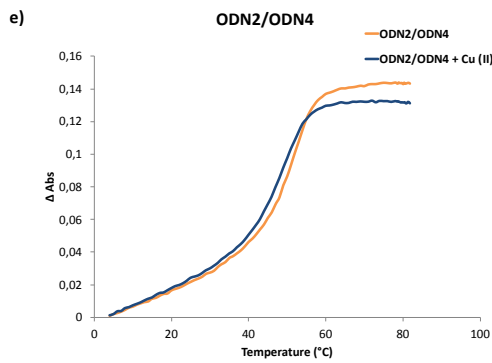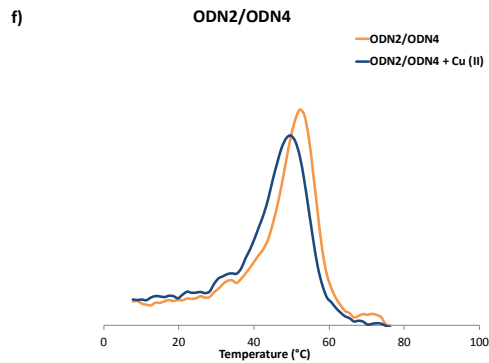

### 4. ODN3/ODN4

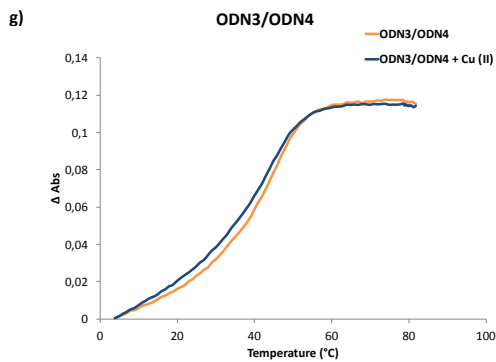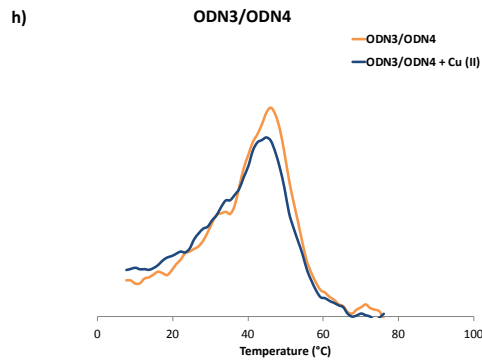

## IV. Friedel-Crafts alkylation/protonation

### a. Synthesis of starting materials

#### 2-Methyl-1-(thiazol-2-yl)prop-2-en-1-ol

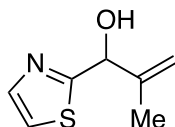

2-(Trimethylsilyl)triazole (1.60 mL, 10.0 mmol, 1.00 equiv.) and methacrolein (0.82 mL, 10.0 mmol, 1.00 equiv.) were stirred at room temperature for 4 h. The mixture was then diluted in THF (200 mL) and tetrabutylammonium fluoride solution 1.0 M in THF (10.0 mL, 10.0 mmol, 1.00 equiv.) was added. After additional stirring for 1 h, the solvent was removed under vacuum and the crude residue was dissolved in EtOAc and washed with a saturated aqueous solution of NaHCO<sub>3</sub>. The crude reaction mixture was purified by flash column chromatography over silica gel (PE/EtOAc, from 100:0 to 80:20) to afford the desired alcohol as a yellow oil, with 50% yield (776 mg, 5.00 mmol). <sup>1</sup>H NMR and <sup>13</sup>C NMR spectra matched those reported in the literature.<sup>3</sup>

#### 2-Methyl-1-(thiazol-2-yl)prop-2-en-1-one (16)

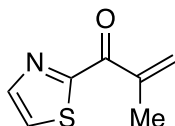

2-Methyl-1-(thiazol-2-yl)prop-2-en-1-ol (100 mg, 0.64 mmol, 1.00 equiv.) was dissolved in dichloromethane (3.50 mL) and MnO<sub>2</sub> (576 mg, 6.40 mmol, 10.0 equiv.) was added to the solution. The mixture was stirred at room temperature for 1.5 h. After completion of the reaction monitored by TLC (PE/EtOAc, 70:30), the crude was filtered over Celite<sup>®</sup> and the solvent was removed under vacuum. The product was obtained as colourless oil with 87% yield (85.3 mg, 0.56 mmol) and was used on the same day without further purification. <sup>1</sup>H NMR and <sup>13</sup>C NMR spectra matched those reported in the literature.<sup>3</sup>

### 5-(Piperidin-1-yl)-1H-indole (17m)

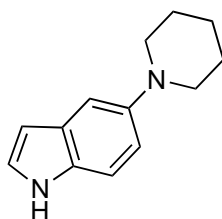

In an oven-dried tube, Pd<sub>2</sub>dba<sub>3</sub> (9.10 mg, 0.01 mmol, 1.00 mol%), 2-dicyclohexylphosphino-2'-(*N,N*-dimethylamino)biphenyl (9.40 mg, 0.024 mmol, 2.40 mol%) and 5-bromoindole (196 mg, 1.00 mmol, 1.00 equiv.) were dissolved in THF (1.00 mL). LiHMDS solution 1.0 M in THF (2.20 mL, 2.20 mmol, 2.20 equiv.) and morpholine (105  $\mu$ L, 1.20 mmol, 1.20 equiv.) were slowly added to the solution, which was stirred at 65 °C overnight. After cooling down at room temperature, HCl 1M (2.00 mL) was added and the mixture was stirred for additional 15 min. The crude was diluted with a saturated aqueous solution of NaHCO<sub>3</sub>, and extracted with EtOAc. The combined organic phases were washed with brine, dried over MgSO<sub>4</sub> and concentrated under vacuum. The crude was purified by flash column chromatography over silica gel (PE/EtOAc, from 100:0 to 125:75) to afford the desired compound as a brown oil with 75% yield (150 mg, 0.75 mmol). <sup>1</sup>H NMR and <sup>13</sup>C NMR spectra matched those reported in the literature.<sup>3</sup>

### 4-(1H-Indol-5-yl)morpholine (17n)

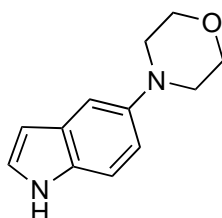

In an oven-dried tube, Pd<sub>2</sub>dba<sub>3</sub> (9.10 mg, 0.01 mmol, 1.00 mol%), 2-dicyclohexylphosphino-2'-(*N,N*-dimethylamino)biphenyl (9.40 mg, 0.024 mmol, 2.40 mol%) and 5-bromoindole (196 mg, 1.00 mmol, 1.00 equiv.) were dissolved in THF (1.00 mL). LiHMDS solution 1.0 M in THF (2.20 mL, 2.20 mmol, 2.20 equiv.) and morpholine (105  $\mu$ L, 1.20 mmol, 1.20 equiv.) were slowly added to the solution, which was stirred at 65 °C overnight. After cooling down at room temperature, HCl 1M (2.00 mL) was added and the mixture was stirred for additional 15 min. The crude was diluted with a saturated aqueous solution of NaHCO<sub>3</sub>, and extracted with EtOAc. The combined organic phases were washed with brine, dried over MgSO<sub>4</sub> and concentrated under vacuum. The crude residue was purified by flash column chromatography over silica gel (PE/EtOAc, from 100:0 to 125:75) to afford the desired compound as a brown oil with 70% yield (142 mg, 0.70 mmol). <sup>1</sup>H NMR and <sup>13</sup>C NMR spectra matched those reported in the literature.<sup>4</sup>

## **b. Preparation of racemic products**

In an oven-dried tube,  $\text{Cu}(\text{NO}_3)_2 \cdot 3\text{H}_2\text{O}$  (6.30 mg, 0.026 mmol, 10 mol%) and 4,4'-dimethyl-2,2'-bipyridyl (dmbipy, 5.70 mg, 0.03 mmol, 12 mol%) were dissolved in acetonitrile (2.00 mL). The mixture was stirred for 10 min and a solution of enone (**16**) (40.0 mg, 0.26 mmol, 1.00 equiv.) and the desired indole (0.39 mmol, 1.50 equiv.) in acetonitrile (2.00 mL) was added. The mixture was stirred at room temperature for 3 d. The solvent was removed under vacuum and the crude residue was purified by flash column chromatography over silica gel (*n*-Hexanes/EtOAc) to afford the desired compound.

## **c. Procedure of enantioselective Friedel-Crafts alkylation/protonation**

### ***1. Preparation of a 200 mM MES buffer (pH 5.0)***

3-(*N*-Morpholino)ethanesulfonic acid (2.13 g, 10.0 mmol) was dissolved in Milli-Q  $\text{H}_2\text{O}$  (40.0 mL). The pH was adjusted to 5.0 using a pH meter with a NaOH solution 0.1 M. The volume was finally adjusted with MilliQ- $\text{H}_2\text{O}$  to 50 mL.

### ***2. Preparation of a 0.90 mM $\text{Cu}(\text{NO}_3)_2 \cdot \text{dmbipy}$ stock solution***

$\text{Cu}(\text{NO}_3)_2 \cdot 3\text{H}_2\text{O}$  (4.80 mg, 0.02 mmol, 1.00 equiv.) and 4,4'-dimethyl-2,2'-bipyridyl (dmbipy, 4.40 mg, 0.024 mmol, 1.20 equiv.) were dissolved in 22.2 mL of Milli-Q  $\text{H}_2\text{O}$ . The mixture was stirred at room temperature for 5 h and used in the next step without further purification.

### ***3. Preparation of a 1.00 mM $\text{Cu}(\text{NO}_3)_2$ stock solution***

$\text{Cu}(\text{NO}_3)_2 \cdot 3\text{H}_2\text{O}$  (4.80 mg, 0.02 mmol, 1.00 equiv.) was dissolved in 20.0 mL of Milli-Q  $\text{H}_2\text{O}$ . The mixture was stirred at room temperature for 1 h and used the next day.

### ***4. General procedure A. Enantioselective Friedel-Crafts alkylation/protonation, supramolecular approach with st-DNA***

St-DNA solution (29.0  $\mu\text{L}$ , stock solution 4.5 mg/mL or 6.92 mM (bp) in Milli-Q  $\text{H}_2\text{O}$ , 2 mM final concentration) and Milli-Q  $\text{H}_2\text{O}$  (23.7  $\mu\text{L}$ ) were successively added to a 500  $\mu\text{L}$  Eppendorf tube. The reaction mixture was briefly mixed. MES buffer solution (10.0  $\mu\text{L}$ , stock solution 200 mM in Milli-Q



H<sub>2</sub>O, pH 5.0, 1/10 V<sub>tot</sub>) and Cu(NO<sub>3</sub>)<sub>2</sub>.dmbipy solution (33.3 μL, stock solution 0.90 mM in Milli-Q H<sub>2</sub>O prepared 24 h in advance, 30.0 mol%) were then added. The resulting mixture was stirred at 19 °C for 20 min and frozen at –20 °C for 30 min. Freshly prepared enone (**16**) (2.00 μL, stock solution 0.05 M in DMSO, 0.10 μmol, 1.00 equiv.) was added and the mixture was frozen again at –20 °C for 30 min. Desired indole (2.00 μL, stock solution 0.05 M in DMSO, 0.10 μmol, 1.00 equiv.) was finally added in a cold room. The resulting solution was stirred at 4 °C for 3 d in a thermoshaker placed in a cold room. The mixture was then transferred into 1.5 mL Eppendorf tube. The initial Eppendorf tube was rinsed with H<sub>2</sub>O (100 μL) and diethyl ether (100 μL). Additional diethyl ether (400 μL) was finally added. After stirring, the tube was placed in dry ice to freeze H<sub>2</sub>O. The ethereal phase was poured into a new 1.5 mL Eppendorf tube. The process was repeated twice (2 x 500 μL diethyl ether). After evaporation of diethyl ether, the sample was dissolved in *i*-PrOH (2 x 50 μL), transferred in an HPLC mini vial and injected to measure both the conversion and the *ee*.

**5. General procedure B. Enantioselective Friedel-Crafts alkylation/protonation, supramolecular approach with ODN5/ODN4 duplex.**

Strand solution **ODN5** (21.8 μL, stock solution 1838 nmol/mL in Milli-Q H<sub>2</sub>O, 40.0 mol%), counter strand solution **ODN4** (15.4 μL stock solution 2599 nmol/mL in Milli-Q H<sub>2</sub>O, 40.0 mol%) and Milli-Q H<sub>2</sub>O (15.5 μL) were successively added to a 500 μL Eppendorf tube. The reaction mixture was briefly mixed, heated at 90 °C for 5 min and allowed to cool down at room temperature. MES buffer solution (10.0 μL, stock solution 200 mM in Milli-Q H<sub>2</sub>O, pH 5.0, 1/10 V<sub>tot</sub>) and Cu(NO<sub>3</sub>)<sub>2</sub>.dmbipy solution (33.3 μL, stock solution 0.90 mM in Milli-Q H<sub>2</sub>O prepared 24 h in advance, 30.0 mol%) were then added. The resulting mixture was stirred at 19 °C for 20 min and frozen at –20 °C for 30 min. Freshly prepared enone (**16**) (2.00 μL, stock solution 0.05 M in DMSO, 0.10 μmol, 1.00 equiv.) was added and the mixture was frozen again at –20 °C for 30 min. Desired indole (2.00 μL, stock solution 0.05 M in DMSO, 0.10 μmol, 1.00 equiv.) was finally added in a cold room. The resulting solution was stirred at 4 °C for 3 d in a thermoshaker placed in a cold room. The mixture was then transferred into 1.5 mL Eppendorf tube. The initial Eppendorf tube was rinsed with H<sub>2</sub>O (100 μL) and diethyl ether (100 μL). Additional diethyl ether (400 μL) was finally added. After stirring, the tube was placed in dry ice to freeze H<sub>2</sub>O. The ethereal phase was poured into a new 1.5 mL Eppendorf tube. The process was repeated twice (2 x 500 μL diethyl ether). After evaporation of diethyl ether, the sample was dissolved in *i*-PrOH (2 x 50 μL), transferred in an HPLC mini vial and injected to measure both the conversion and the *ee*.

**6. General procedure C. Enantioselective Friedel-Crafts alkylation/protonation, covalent approach with ODN1/ODN4 duplex.**

Strand solution **ODN1** (18.7  $\mu\text{L}$ , stock solution 2136 nmol/mL in Milli-Q  $\text{H}_2\text{O}$ , 40.0 mol%), counter strand solution **ODN4** (15.4  $\mu\text{L}$  stock solution 2599 nmol/mL in Milli-Q  $\text{H}_2\text{O}$ , 40.0 mol%) and Milli-Q  $\text{H}_2\text{O}$  (21.9  $\mu\text{L}$ ) were successively added to a 500  $\mu\text{L}$  Eppendorf tube. The reaction mixture was briefly mixed, heated at 90  $^\circ\text{C}$  for 5 min and allowed to cool down at room temperature. MES buffer solution (10.0  $\mu\text{L}$ , stock solution 200 mM in Milli-Q  $\text{H}_2\text{O}$ , pH 5.0, 1/10  $V_{\text{tot}}$ ) and  $\text{Cu}(\text{NO}_3)_2$  solution (30.0  $\mu\text{L}$ , stock solution 1.00 mM in Milli-Q  $\text{H}_2\text{O}$ , 30.0 mol%) were then added. The resulting mixture was stirred at 19  $^\circ\text{C}$  for 20 min and frozen at  $-20$   $^\circ\text{C}$  for 30 min. Freshly prepared enone (**16**) (2.00  $\mu\text{L}$ , stock solution 0.05 M in DMSO, 0.10  $\mu\text{mol}$ , 1.00 equiv.) was added and the mixture was frozen again at  $-20$   $^\circ\text{C}$  for 30 min. Desired indole (2.00  $\mu\text{L}$ , stock solution 0.05 M in DMSO, 0.10  $\mu\text{mol}$ , 1.00 equiv.) was finally added in a cold room. The resulting solution was stirred at 4  $^\circ\text{C}$  for 3 d in a thermoshaker placed in a cold room. The mixture was then transferred into 1.5 mL Eppendorf tube. The initial Eppendorf tube was rinsed with  $\text{H}_2\text{O}$  (100  $\mu\text{L}$ ) and diethyl ether (100  $\mu\text{L}$ ). Additional diethyl ether (400  $\mu\text{L}$ ) was finally added. After stirring, the tube was placed in dry ice to freeze  $\text{H}_2\text{O}$ . The ethereal phase was poured into a new 1.5 mL Eppendorf tube. The process was repeated twice (2 x 500  $\mu\text{L}$  diethyl ether). After evaporation of diethyl ether, the sample was dissolved in *i*-PrOH (2 x 50  $\mu\text{L}$ ), transferred in an HPLC mini vial and injected to measure both the conversion and the *ee*.

**7. General procedure D. Enantioselective Friedel-Crafts alkylation/protonation, covalent approach with ODN2/ODN4 duplex.**

Strand solution **ODN2** (34.7  $\mu\text{L}$ , stock solution 1153 nmol/mL in Milli-Q  $\text{H}_2\text{O}$ , 40.0 mol%), counter strand solution **ODN4** (15.4  $\mu\text{L}$  stock solution 2599 nmol/mL in Milli-Q  $\text{H}_2\text{O}$ , 40.0 mol%) and Milli-Q  $\text{H}_2\text{O}$  (5.90  $\mu\text{L}$ ) were successively added to a 500  $\mu\text{L}$  Eppendorf tube. The reaction mixture was briefly mixed, heated at 90  $^\circ\text{C}$  for 5 min and allowed to cool down at room temperature. MES buffer solution (10.0  $\mu\text{L}$ , stock solution 200 mM in Milli-Q  $\text{H}_2\text{O}$ , pH 5.0, 1/10  $V_{\text{tot}}$ ) and  $\text{Cu}(\text{NO}_3)_2$  solution (30.0  $\mu\text{L}$ , stock solution 1.00 mM in Milli-Q  $\text{H}_2\text{O}$ , 30.0 mol%) were then added. The resulting mixture was stirred at 19  $^\circ\text{C}$  for 20 min and frozen at  $-20$   $^\circ\text{C}$  for 30 min. Freshly prepared enone (**16**) (2.00  $\mu\text{L}$ , stock solution 0.05 M in DMSO, 0.10  $\mu\text{mol}$ , 1.00 equiv.) was added and the mixture was frozen again at  $-20$   $^\circ\text{C}$  for 30 min. Desired indole (2.00  $\mu\text{L}$ , stock solution 0.05 M in DMSO, 0.10  $\mu\text{mol}$ , 1.00 equiv.) was finally added in a cold room. The resulting solution was stirred at 4  $^\circ\text{C}$  for 3 d in a thermoshaker placed in a cold room. The mixture was then transferred into 1.5 mL Eppendorf tube. The initial Eppendorf tube was rinsed with  $\text{H}_2\text{O}$  (100  $\mu\text{L}$ ) and diethyl ether (100  $\mu\text{L}$ ). Additional diethyl ether (400  $\mu\text{L}$ ) was finally added. After stirring, the tube was placed in dry ice to freeze  $\text{H}_2\text{O}$ .

The ethereal phase was poured into a new 1.5 mL Eppendorf tube. The process was repeated twice (2 x 500  $\mu$ L diethyl ether). After evaporation of diethyl ether, the sample was dissolved in *i*-PrOH (2 x 50  $\mu$ L), transferred in an HPLC mini vial and injected to measure both the conversion and the *ee*.

**8. General procedure E. Enantioselective Friedel-Crafts alkylation/protonation, covalent approach with ODN3/ODN4 duplex.**

Strand solution **ODN3** (50.2  $\mu$ L, stock solution 797 nmol/mL in Milli-Q H<sub>2</sub>O, 40.0 mol%) and counter strand solution **ODN4** (15.4  $\mu$ L stock solution 2599 nmol/mL in Milli-Q H<sub>2</sub>O, 40.0 mol%) successively added to a 500  $\mu$ L Eppendorf tube. The reaction mixture was briefly mixed, heated at 90 °C for 5 min and allowed to cool down at room temperature. MES buffer solution (10.0  $\mu$ L, stock solution 200 mM in Milli-Q H<sub>2</sub>O, pH 5.0, 1/10 V<sub>tot</sub>) and Cu(NO<sub>3</sub>)<sub>2</sub> solution (30.0  $\mu$ L, stock solution 1.00 mM in Milli-Q H<sub>2</sub>O, 30.0 mol%) were then added. The resulting mixture was stirred at 19 °C for 20 min and frozen at -20 °C for 30 min. Freshly prepared enone (**16**) (2.00  $\mu$ L, stock solution 0.05 M in DMSO, 0.10  $\mu$ mol, 1.00 equiv.) was added and the mixture was frozen again at -20 °C for 30 min. Desired indole (2.00  $\mu$ L, stock solution 0.05 M in DMSO, 0.10  $\mu$ mol, 1.00 equiv.) was finally added in a cold room. The resulting solution was stirred at 4 °C for 3 d in a thermoshaker placed in a cold room. The mixture was then transferred into 1.5 mL Eppendorf tube. The initial Eppendorf tube was rinsed with H<sub>2</sub>O (100  $\mu$ L) and diethyl ether (100  $\mu$ L). Additional diethyl ether (400  $\mu$ L) was finally added. After stirring, the tube was placed in dry ice to freeze H<sub>2</sub>O. The ethereal phase was poured into a new 1.5 mL Eppendorf tube. The process was repeated twice (2 x 500  $\mu$ L diethyl ether). After evaporation of diethyl ether, the sample was dissolved in *i*-PrOH (2 x 50  $\mu$ L), transferred in an HPLC mini vial and injected to measure both the conversion and the *ee*.

d. NMR description of racemate products, HPLC methods and results of enantioselective protonation reactions

3-(1*H*-Indol-3-yl)-2-methyl-1-(thiazol-2-yl)propan-1-one (18a)

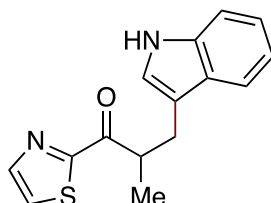

<sup>1</sup>H NMR and <sup>13</sup>C NMR spectra matched those reported in the literature.<sup>3</sup>

**HPLC:** Chiralpak IA column, 250 bar, T = 30 °C, *n*-Hexane/*i*-PrOH = 97:3, 1 mL/min, λ = 280 nm, t<sub>R</sub> = 44.430 min and t<sub>R</sub> = 53.322 min.

| Entry | General procedure | Sequences | Indole/Products <sup>a</sup> | ee (%) <sup>a</sup> |
|-------|-------------------|-----------|------------------------------|---------------------|
| 1     | A                 | st-DNA    | 5 : 95                       | (+) 21              |
| 2     | B                 | ODN5/ODN4 | 13 : 87                      | (+) 40              |
| 3     | C                 | ODN1/ODN4 | 70 : 30                      | (-) 20              |
| 4     | D                 | ODN2/ODN4 | 24 : 76                      | (-) 80              |
| 5     | E                 | ODN3/ODN4 | 70 : 30                      | (+) 7               |

<sup>a</sup>Determined by HPLC.

### 3-(7-Methoxy-1*H*-indol-3-yl)-2-methyl-1-(thiazol-2-yl)propan-1-one (18b)

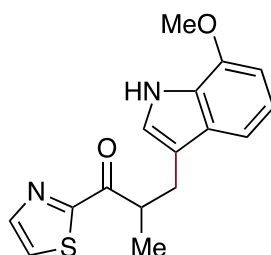

<sup>1</sup>H NMR and <sup>13</sup>C NMR spectra matched those reported in the literature.<sup>3</sup>

**HPLC:** Chiralpak IB column, 100 bar, T = 20 °C, *n*-Heptane (+ 0.1% diethylamine)/EtOH (+ 0.1% diethylamine) = 95:5, 1 mL/min, λ = 300 nm, t<sub>R</sub> = 23.083 min and t<sub>R</sub> = 27.820 min.

| Entry | General procedure | Sequences | Indole/Products <sup>a</sup> | ee (%) <sup>a</sup> |
|-------|-------------------|-----------|------------------------------|---------------------|
| 1     | A                 | st-DNA    | 4 : 96                       | (+) 17              |
| 2     | B                 | ODN5/ODN4 | 20 : 80                      | (+) 38              |
| 3     | C                 | ODN1/ODN4 | 48 : 52                      | (-) 12              |
| 4     | D                 | ODN2/ODN4 | 22 : 78                      | (-) 86              |
| 5     | E                 | ODN3/ODN4 | 68 : 32                      | (-) 29              |

<sup>a</sup>Determined by HPLC.

### 3-(6-Methoxy-1*H*-indol-3-yl)-2-methyl-1-(thiazol-2-yl)propan-1-one (18c)

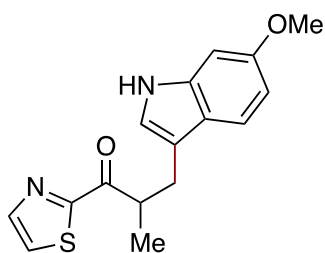

<sup>1</sup>H NMR and <sup>13</sup>C NMR spectra matched those reported in the literature.<sup>3</sup>

**HPLC:** Chiralpak IA column, 100 bar, T = 25 °C, *n*-Heptane (+ 0.1% diethylamine)/EtOH (+ 0.1% diethylamine) = 95:5, 1 mL/min, λ = 300 nm, t<sub>R</sub> = 33.767 min and t<sub>R</sub> = 52.823 min.

| Entry | General procedure | Sequences | Indole/Products <sup>a</sup> | ee (%) <sup>a</sup> |
|-------|-------------------|-----------|------------------------------|---------------------|
| 1     | A                 | st-DNA    | 12 : 88                      | (+) 29              |
| 2     | B                 | ODN5/ODN4 | 35 : 65                      | (+) 5               |
| 3     | C                 | ODN1/ODN4 | 56 : 44                      | (-) 16              |
| 4     | D                 | ODN2/ODN4 | 36 : 64                      | (-) 86              |
| 5     | E                 | ODN3/ODN4 | 79 : 21                      | (-) 19              |

<sup>a</sup>Determined by HPLC.

**3-(5-Methoxy-1*H*-indol-3-yl)-2-methyl-1-(thiazol-2-yl)propan-1-one (18d)**

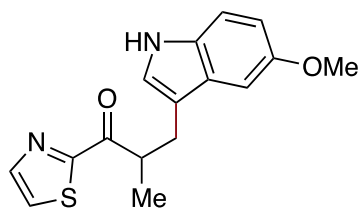

<sup>1</sup>H NMR and <sup>13</sup>C NMR spectra matched those reported in the literature.<sup>3</sup>

**HPLC:** Chiralpak IA column, 100 bar, T = 20 °C, *n*-Heptane (+ 0.1% diethylamine)/EtOH (+ 0.1% diethylamine) = 95:5, 1 mL/min, λ = 300 nm, t<sub>R</sub> = 24.167 min and t<sub>R</sub> = 28.463 min.

| Entry | General procedure | Sequences | Indole/Products <sup>a</sup> | ee (%) <sup>a</sup> |
|-------|-------------------|-----------|------------------------------|---------------------|
| 1     | A                 | st-DNA    | 17 : 83                      | (+) 43              |
| 2     | B                 | ODN5/ODN4 | 1 : 99                       | (+) 41              |
| 3     | C                 | ODN1/ODN4 | 22 : 78                      | (-) 6               |
| 4     | D                 | ODN2/ODN4 | 15 : 85                      | (-) 74              |
| 5     | E                 | ODN3/ODN4 | 35 : 65                      | 0                   |

<sup>a</sup>Determined by HPLC.

**2-Methyl-3-(7-methyl-1*H*-indol-3-yl)-1-(thiazol-2-yl)propan-1-one (18e)**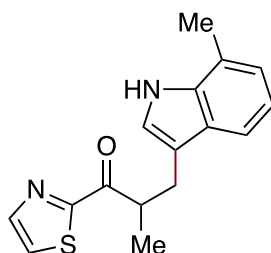

The racemic was isolated as a slightly yellow oil.  $R_f = 0.59$  (PE/EtOAc 7:3).  $^1\text{H NMR}$  (400 MHz,  $\text{CDCl}_3$ )  $\delta$  8.02 (d,  $J = 3.0$  Hz, 1H), 7.92 (br,  $-NH$ ), 7.63 (d,  $J = 3.0$  Hz, 1H), 7.61 (d,  $J = 7.8$  Hz, 1H), 7.07 (t,  $J = 7.5$  Hz, 1H), 7.02-6.97 (m, 2H), 4.30-4.21 (m, 1H), 3.40 (dd,  $J = 14.4, 6.3$  Hz, 1H), 2.90 (dd,  $J = 14.4, 7.9$  Hz, 1H), 2.46 (s, 3H), 1.31 (d,  $J = 6.9$  Hz, 3H).  $^{13}\text{C NMR}$  (100 MHz,  $\text{CDCl}_3$ )  $\delta$  197.5, 167.1, 144.8, 135.9, 127.3, 126.3, 122.6, 122.4, 120.3, 119.7, 117.0, 114.4, 42.6, 29.0, 17.0, 16.7. **HRMS-ESI**  $m/z$ : calculated for  $\text{C}_{16}\text{H}_{17}\text{N}_2\text{OS}$   $[\text{M}+\text{H}]^+$  285. 1061. found 323.1063. IR (neat): 3411, 1676, 1388, 926, 733  $\text{cm}^{-1}$ .

**HPLC:** Chiralpak IA column, 250 bar,  $T = 30$  °C,  $n$ -Hexane/*i*-PrOH = 98:2, 1 mL/min,  $\lambda = 280$  nm,  $t_R = 56.977$  min and  $t_R = 66.383$  min.

| Entry | General procedure | Sequences | Indole/Products <sup>a</sup> | ee (%) <sup>a</sup> |
|-------|-------------------|-----------|------------------------------|---------------------|
| 1     | A                 | st-DNA    | 8 : 92                       | (+) 11              |
| 2     | B                 | ODN5/ODN4 | 8 : 92                       | (+) 37              |
| 3     | C                 | ODN1/ODN4 | 75 : 25                      | (-) 14              |
| 4     | D                 | ODN2/ODN4 | 12 : 88                      | (-) 82              |
| 5     | E                 | ODN3/ODN4 | 74 : 26                      | (+) 8               |

<sup>a</sup>Determined by HPLC.



**2-Methyl-3-(6-methyl-1H-indol-3-yl)-1-(thiazol-2-yl)propan-1-one (18f)**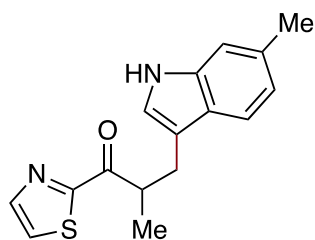

The racemic was isolated as a slightly yellow oil.  $R_f = 0.58$  (PE/EtOAc 1:1).  $^1\text{H NMR}$  (400 MHz,  $\text{CDCl}_3$ )  $\delta$  8.02 (d,  $J = 3.0$  Hz, 1H), 7.85 (br, 1H), 7.63 (d,  $J = 3.0$  Hz, 1H), 7.61 (d,  $J = 8.0$  Hz, 1H), 7.11 (br, 1H), 6.98 (dd,  $J = 8.0, 1.4$  Hz, 1H), 6.93 (d,  $J = 2.3$  Hz, 1H), 4.31-4.19 (m, 1H), 3.38 (dd,  $J = 14.3, 6.3$  Hz, 1H), 2.88 (dd,  $J = 14.3, 7.9$  Hz, 1H), 2.46 (s, 3H), 1.30 (d,  $J = 7.0$  Hz, 3H).  $^{13}\text{C NMR}$  (100 MHz,  $\text{CDCl}_3$ )  $\delta$  197.6, 167.1, 144.8, 136.8, 131.8, 126.3, 125.6, 122.0, 121.2, 118.9, 113.7, 111.1, 42.6, 28.9, 21.8, 16.9. **HRMS-ESI**  $m/z$ : calculated for  $\text{C}_{16}\text{H}_{17}\text{N}_2\text{OS}$   $[\text{M}+\text{H}]^+$  285.1061. found 323.1063. IR (neat): 3406, 1677, 1453, 1388, 800, 734  $\text{cm}^{-1}$ .

**HPLC:** Chiralpak IB column, 250 bar,  $T = 30$  °C,  $n$ -Hexane/ $i$ -PrOH = 92:8, 1 mL/min,  $\lambda = 300$  nm,  $t_R = 15.375$  min and  $t_R = 19.436$  min.

| Entry | General procedure | Sequences | Indole/Products <sup>a</sup> | ee (%) <sup>a</sup> |
|-------|-------------------|-----------|------------------------------|---------------------|
| 1     | A                 | st-DNA    | 5 : 95                       | (+) 36              |
| 2     | B                 | ODN5/ODN4 | 1 : 99                       | (+) 36              |
| 3     | C                 | ODN1/ODN4 | 56 : 44                      | (-) 14              |
| 4     | D                 | ODN2/ODN4 | 1 : 99                       | (-) 73              |
| 5     | E                 | ODN3/ODN4 | 58 : 42                      | (+) 13              |

<sup>a</sup>Determined by HPLC.

**2-Methyl-3-(5-methyl-1*H*-indol-3-yl)-1-(thiazol-2-yl)propan-1-one (18g)**

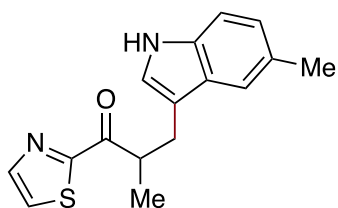

<sup>1</sup>H NMR and <sup>13</sup>C NMR spectra matched those reported in the literature.<sup>3</sup>

**HPLC:** Chiralpak IA column, 250 bar, T = 30 °C, *n*-Hexane/*i*-PrOH = 97:3, 1 mL/min, λ = 280 nm, t<sub>R</sub> = 34.221 min and t<sub>R</sub> = 44.000 min.

| Entry | General procedure | Sequences | Indole/Products <sup>a</sup> | ee (%) <sup>a</sup> |
|-------|-------------------|-----------|------------------------------|---------------------|
| 1     | A                 | st-DNA    | 1 : 99                       | (+) 43              |
| 2     | B                 | ODN5/ODN4 | 10 : 90                      | (+) 43              |
| 3     | C                 | ODN1/ODN4 | 54 : 46                      | (-) 4               |
| 4     | D                 | ODN2/ODN4 | 19 : 81                      | (-) 67              |
| 5     | E                 | ODN3/ODN4 | 50 : 50                      | (+) 20              |

<sup>a</sup>Determined by HPLC.

### 3-(5-Hydroxy-1*H*-indol-3-yl)-2-methyl-1-(thiazol-2-yl)propan-1-one (18h)

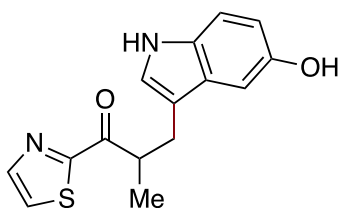

<sup>1</sup>H NMR and <sup>13</sup>C NMR spectra matched those reported in the literature.<sup>3</sup>

**HPLC:** Chiralpak IA column, 250 bar, T = 25 °C, *n*-Heptane (+ 0.1% diethylamine)/EtOH (+ 0.1% diethylamine) = 90:10, 1 mL/min, λ = 300 nm, t<sub>R</sub> = 29.340 min and t<sub>R</sub> = 34.167 min.

| Entry | General procedure | Sequences        | Indole/Products <sup>a</sup> | ee (%) <sup>a</sup> |
|-------|-------------------|------------------|------------------------------|---------------------|
| 1     | A                 | st-DNA           | 17 : 83                      | (+) 37              |
| 2     | B                 | <b>ODN5/ODN4</b> | > 1 : 99                     | (+) 29              |
| 3     | C                 | <b>ODN1/ODN4</b> | 29 : 71                      | (-) 20              |
| 4     | D                 | <b>ODN2/ODN4</b> | 12 : 88                      | (-) 70              |
| 5     | E                 | <b>ODN3/ODN4</b> | 47 : 53                      | (-) 15              |

<sup>a</sup>Determined by HPLC.

### 3-(5-Fluoro-1H-indol-3-yl)-2-methyl-1-(thiazol-2-yl)propan-1-one (18i)

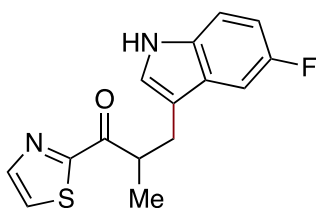

The racemic was isolated as a slightly yellow oil.  $R_f = 0.34$  (PE/EtOAc 7:3).  $^1\text{H NMR}$  (400 MHz,  $\text{CDCl}_3$ )  $\delta$  8.03 (d,  $J = 3.1$  Hz, 1H), 8.01 (s, 1H), 7.65 (d,  $J = 3.1$  Hz, 1H), 7.39 (dd,  $J = 9.7, 2.5$  Hz, 1H), 7.22 (dd,  $J = 9.7, 4.3$  Hz, 1H), 7.04 (d,  $J = 2.4$  Hz, 1H), 6.92 (td,  $J = 9.0, 2.5$  Hz, 1H), 4.27-4.13 (m, 1H), 3.34 (dd,  $J = 14.4, 6.3$  Hz, 1H), 2.84 (dd,  $J = 14.4, 7.9$  Hz, 1H), 1.29 (d,  $J = 6.9$  Hz, 3H).  $^{13}\text{C NMR}$  (100 MHz,  $\text{CDCl}_3$ )  $\delta$  197.3, 167.0, 157.9 (d,  $J = 234.3$  Hz), 144.9, 132.8, 128.1 (d,  $J = 9.8$  Hz), 126.4, 124.4, 114.1 (d,  $J = 4.8$  Hz), 111.7 (d,  $J = 9.7$  Hz), 110.4 (d,  $J = 26.5$  Hz), 104.2 (d,  $J = 23.5$  Hz), 42.5, 28.9, 16.8.  $^{19}\text{F NMR}$  (377 MHz,  $\text{CDCl}_3$ )  $\delta$  -124.71. **HRMS-ESI**  $m/z$ : calculated for  $\text{C}_{15}\text{H}_{13}\text{FN}_2\text{OSNa}$   $[\text{M}+\text{Na}]^+$  307.0630. found 307.0554. IR (neat): 3410, 1678, 1485, 1389, 936  $\text{cm}^{-1}$ .

**HPLC:** Chiralpak IA column, 250 bar,  $T = 30$  °C, Hexane/*i*-PrOH = 97:3, 1 mL/min,  $\lambda = 280$  nm,  $t_R = 45.925$  min and  $t_R = 53.440$  min.

| Entry | General procedure | Sequences | Indole/Products <sup>a</sup> | ee (%) <sup>a</sup> |
|-------|-------------------|-----------|------------------------------|---------------------|
| 1     | A                 | st-DNA    | 13 : 87                      | (+) 27              |
| 2     | B                 | ODN5/ODN4 | 32 : 68                      | (+) 42              |
| 3     | C                 | ODN1/ODN4 | 85 : 15                      | (-) 2               |
| 4     | D                 | ODN2/ODN4 | 61 : 39                      | (-) 80              |
| 5     | E                 | ODN3/ODN4 | 87 : 13                      | (+) 8               |

<sup>a</sup>Determined by HPLC.

**3-(5-Chloro-1*H*-indol-3-yl)-2-methyl-1-(thiazol-2-yl)propan-1-one (18j)**

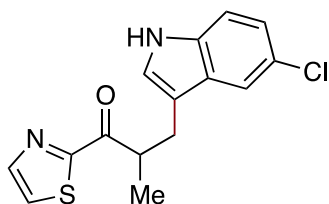

<sup>1</sup>H NMR and <sup>13</sup>C NMR spectra matched those reported in the literature.<sup>3</sup>

**HPLC:** Chiralpak IA column, 250 bar, T = 20 °C, *n*-Heptane (+ 0.1% diethylamine)/EtOH (+ 0.1% diethylamine) = 97:3, 1 mL/min, λ = 300 nm, t<sub>R</sub> = 26.413 min and t<sub>R</sub> = 32.027 min.

| Entry | General procedure | Sequences        | Indole/Products <sup>a</sup> | ee (%) <sup>a</sup> |
|-------|-------------------|------------------|------------------------------|---------------------|
| 1     | A                 | st-DNA           | 31 : 69                      | (+) 19              |
| 2     | B                 | <b>ODN5/ODN4</b> | 53 : 47                      | (+) 4               |
| 3     | C                 | <b>ODN1/ODN4</b> | 89 : 11                      | (+) 27              |
| 4     | D                 | <b>ODN2/ODN4</b> | 68 : 32                      | (-) 63              |
| 5     | E                 | <b>ODN3/ODN4</b> | 95 : 5                       | (+) 7               |

<sup>a</sup>Determined by HPLC.

**3-(5-Bromo-1*H*-indol-3-yl)-2-methyl-1-(thiazol-2-yl)propan-1-one (18k)**

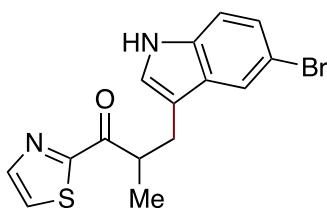

<sup>1</sup>H NMR and <sup>13</sup>C NMR spectra matched those reported in the literature.<sup>3</sup>

**HPLC:** Chiralpak IA column, 250 bar, T = 20 °C, *n*-Heptane (+ 0.1% diethylamine)/EtOH (+ 0.1% diethylamine) = 97:3, 1 mL/min, λ = 300 nm, t<sub>R</sub> = 27.153 min and t<sub>R</sub> = 33.570 min.

| Entry | General procedure | Sequences        | Indole/Products <sup>a</sup> | ee (%) <sup>a</sup> |
|-------|-------------------|------------------|------------------------------|---------------------|
| 1     | A                 | st-DNA           | 30 : 70                      | (+) 16              |
| 2     | B                 | <b>ODN5/ODN4</b> | 63 : 37                      | (+) 20              |
| 3     | C                 | <b>ODN1/ODN4</b> | 90 : 10                      | (+) 11              |
| 4     | D                 | <b>ODN2/ODN4</b> | 82 : 18                      | (-) 54              |
| 5     | E                 | <b>ODN3/ODN4</b> | 96 : 4                       | (+) 19              |

<sup>a</sup>Determined by HPLC.

**Methyl 3-(2-methyl-3-oxo-3-(thiazol-2-yl)propyl)-1H-indole-5-carboxylate (18l)**

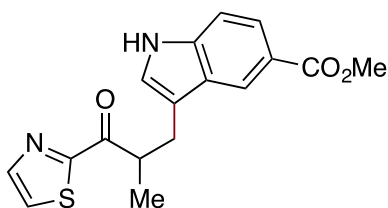

The racemic was isolated as a slightly yellow oil.  $R_f = 0.18$  (PE/EtOAc 7:3).  $^1\text{H NMR}$  (400 MHz,  $\text{CDCl}_3$ )  $\delta$  8.56-8.51 (br, 1H), 8.36 (br, -NH), 8.02 (d,  $J = 3.0$  Hz, 1H), 7.88 (dd,  $J = 8.5, 1.6$  Hz, 1H), 7.64 (d,  $J = 3.0$  Hz, 1H), 7.31 (d,  $J = 8.6$  Hz, 1H), 7.05 (d,  $J = 2.2$  Hz, 1H), 4.29-4.15 (m, 1H), 3.95 (s, 3H), 3.41 (dd,  $J = 14.5, 6.5$  Hz, 1H), 2.93 (dd,  $J = 14.5, 7.5$  Hz, 1H), 1.31 (d,  $J = 6.9$  Hz, 3H).  $^{13}\text{C NMR}$  (100 MHz,  $\text{CDCl}_3$ )  $\delta$  197.3, 168.5, 166.8, 144.9, 138.9, 127.3, 126.4, 124.0, 123.4, 122.3, 121.4, 115.2, 110.9, 52.0, 42.7, 28.7, 16.9. **HRMS-ESI**  $m/z$ : calculated for  $\text{C}_{17}\text{H}_{16}\text{N}_2\text{O}_3\text{SNa}$   $[\text{M}+\text{Na}]^+$  351.0779. found 351.0762. **IR** (neat): 3334, 1679, 1435, 1237, 747  $\text{cm}^{-1}$ .

**HPLC**: Chiralpak IA column, 250 bar,  $T = 30$  °C,  $n$ -Hexane/ $i$ -PrOH = 95:5, 1 mL/min,  $\lambda = 280$  nm,  $t_R = 51.429$  min and  $t_R = 57.744$  min.

| Entry | General procedure | Sequences | Indole/Products <sup>a</sup> | ee (%) <sup>a</sup> |
|-------|-------------------|-----------|------------------------------|---------------------|
| 1     | A                 | st-DNA    | 57 : 43                      | (+) 23              |
| 2     | B                 | ODN5/ODN4 | 76 : 24                      | (+) 24              |
| 3     | C                 | ODN1/ODN4 | traces                       | nd                  |
| 4     | D                 | ODN2/ODN4 | 91 : 9                       | (-) 49              |
| 5     | E                 | ODN3/ODN4 | traces                       | nd                  |

<sup>a</sup>Determined by HPLC.

**2-Methyl-3-(5-(piperidin-1-yl)-1H-indol-3-yl)-1-(thiazol-2-yl)propan-1-one (18m)**

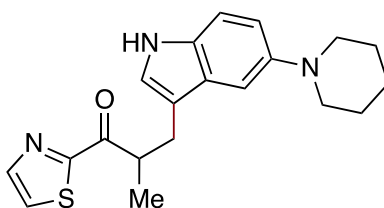

<sup>1</sup>H NMR and <sup>13</sup>C NMR spectra matched those reported in the literature.<sup>3</sup>

**HPLC:** Chiralpak IB column, 250 bar, T = 30 °C, *n*-Hexane/*i*-PrOH = 92:8, 1 mL/min, λ = 300 nm, t<sub>R</sub> = 27.286 min and t<sub>R</sub> = 34.958 min.

| Entry | General procedure | ODN       | Indole/Products <sup>a</sup> | ee (%) <sup>a</sup> |
|-------|-------------------|-----------|------------------------------|---------------------|
| 1     | A                 | st-DNA    | 5 : 95                       | (+) 72              |
| 2     | B                 | ODN5/ODN4 | 16 : 84                      | (+) 72              |
| 3     | C                 | ODN1/ODN4 | traces                       | nd                  |
| 4     | D                 | ODN2/ODN4 | 53 : 47                      | (-) 67              |
| 5     | E                 | ODN3/ODN4 | traces                       | (+) 4               |

<sup>a</sup>Determined by HPLC.



**2-Methyl-3-(5-morpholino-1*H*-indol-3-yl)-1-(thiazol-2-yl)propan-1-one (18n)**

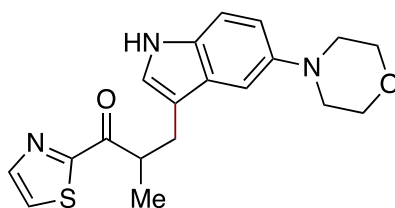

<sup>1</sup>H NMR and <sup>13</sup>C NMR spectra matched those reported in the literature.<sup>3</sup>

**HPLC:** Chiralpak IA column, 250 bar, T = 30 °C, *n*-Hexane/*i*-PrOH = 90:10, 1 mL/min, λ = 280 nm, t<sub>R</sub> = 29.559 min and t<sub>R</sub> = 34.195 min.

| Entry | General procedure | Sequences | Indole/Products <sup>a</sup> | ee (%) <sup>a</sup> |
|-------|-------------------|-----------|------------------------------|---------------------|
| 1     | A                 | st-DNA    | 24 : 76                      | (+) 79              |
| 2     | B                 | ODN5/ODN4 | 23 : 77                      | (+) 71              |
| 3     | C                 | ODN1/ODN4 | 94 : 6                       | (+) 8               |
| 4     | D                 | ODN2/ODN4 | 50 : 50                      | (-) 65              |
| 5     | E                 | ODN3/ODN4 | 87 : 13                      | (+) 8               |

<sup>a</sup>Determined by HPLC.

**2-Methyl-3-(1-methyl-1*H*-indol-3-yl)-1-(thiazol-2-yl)propan-1-one (18o)**

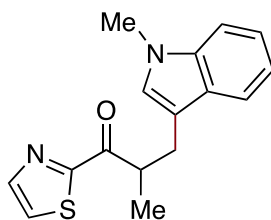

<sup>1</sup>H NMR and <sup>13</sup>C NMR spectra matched those reported in the literature.<sup>3</sup>

**HPLC:** Chiralpak IB column, 250 bar, T = 15 °C, *n*-Hexane/*i*-PrOH = 98:2, 0.8 mL/min, λ = 230 nm, t<sub>R</sub> = 21.430 min and t<sub>R</sub> = 25.843 min.

| Entry | General procedure | Sequences | Indole/Products <sup>a</sup> | ee (%) <sup>a</sup> |
|-------|-------------------|-----------|------------------------------|---------------------|
| 1     | A                 | st-DNA    | > 1 : 99                     | (+) 3               |
| 2     | B                 | ODN5/ODN4 | > 1 : 99                     | (-) 36              |
| 3     | C                 | ODN1/ODN4 | traces                       | nd                  |
| 4     | D                 | ODN2/ODN4 | > 1 : 99                     | (+) 61              |
| 5     | E                 | ODN3/ODN4 | traces                       | nd                  |

<sup>a</sup>Determined by HPLC.

## V. NMR of compounds

### a. $^1\text{H}$ and $^{13}\text{C}$ NMR spectra for compound (3)

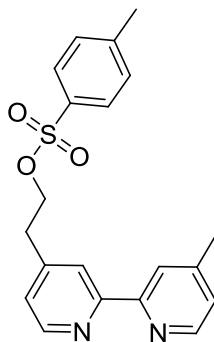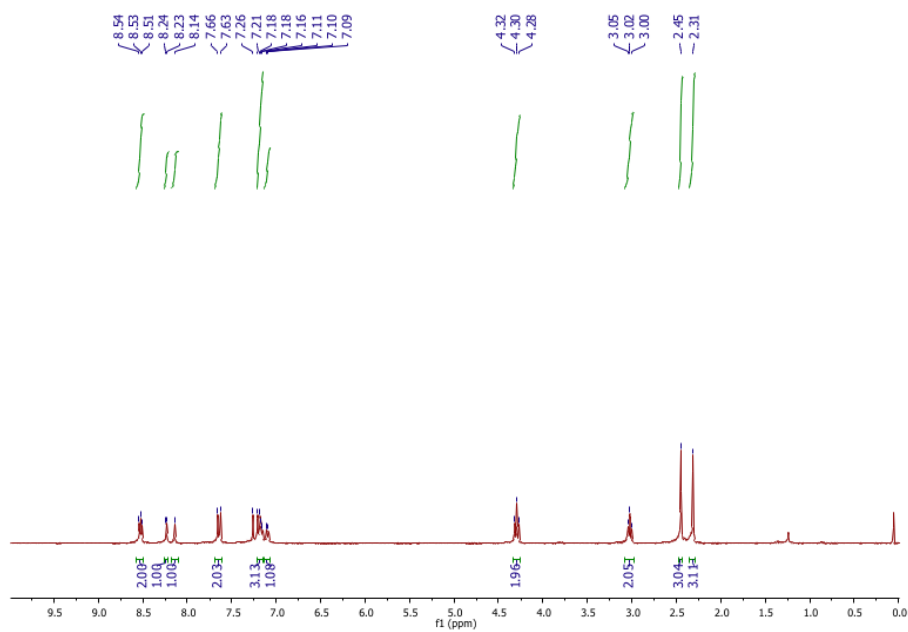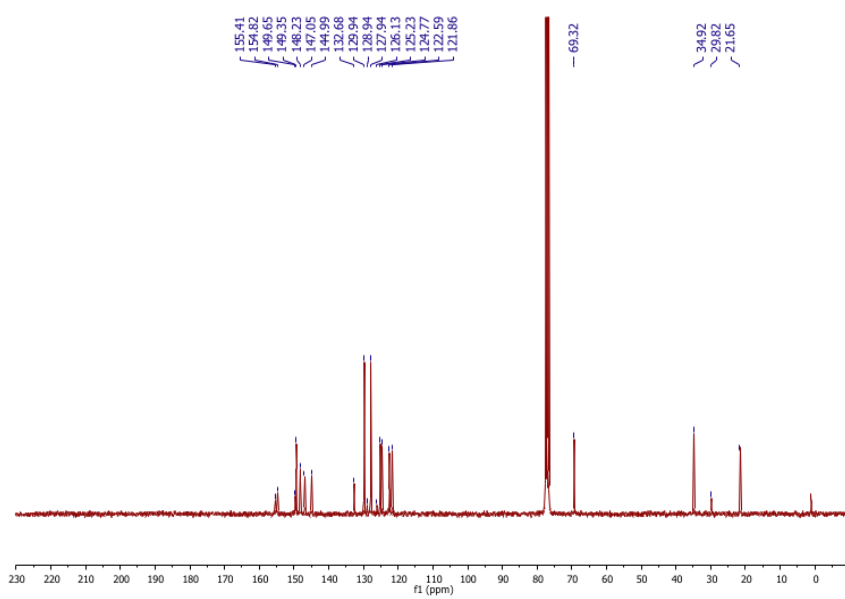

b.  $^1\text{H}$  and  $^{13}\text{C}$ NMR spectra of compound (4)

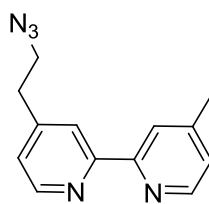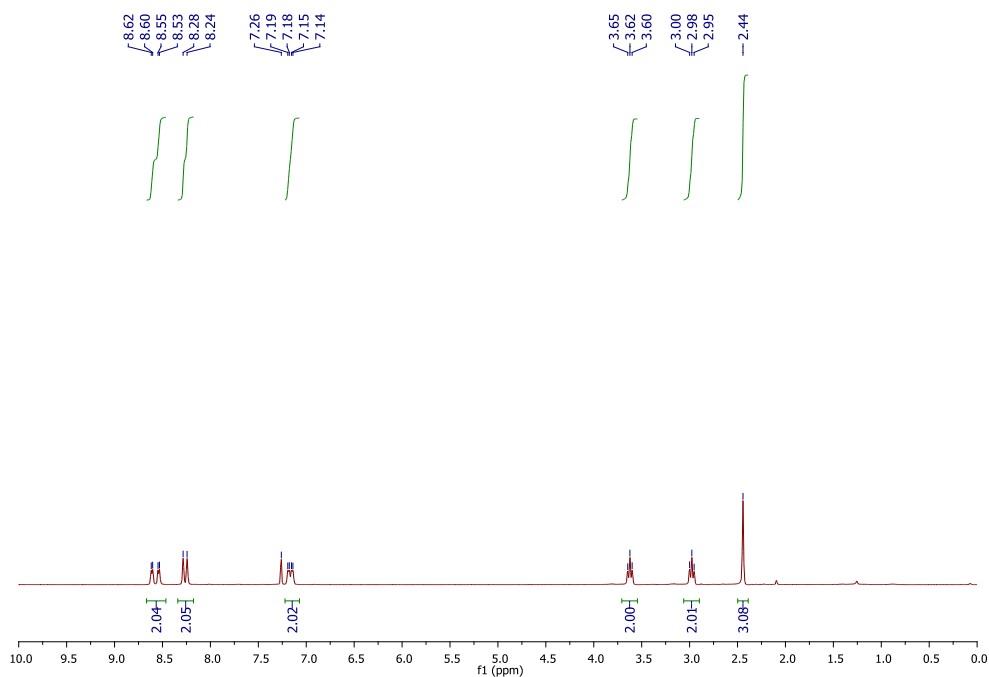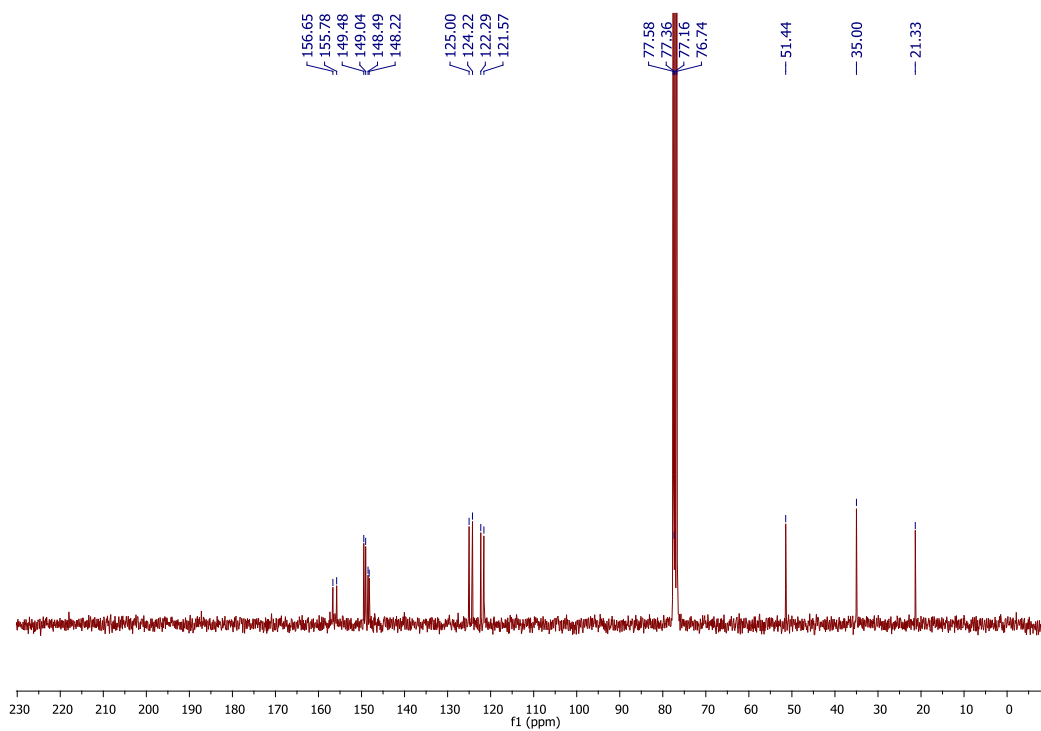

c.  $^1\text{H}$  and  $^{13}\text{C}$  NMR spectra for compound (5)

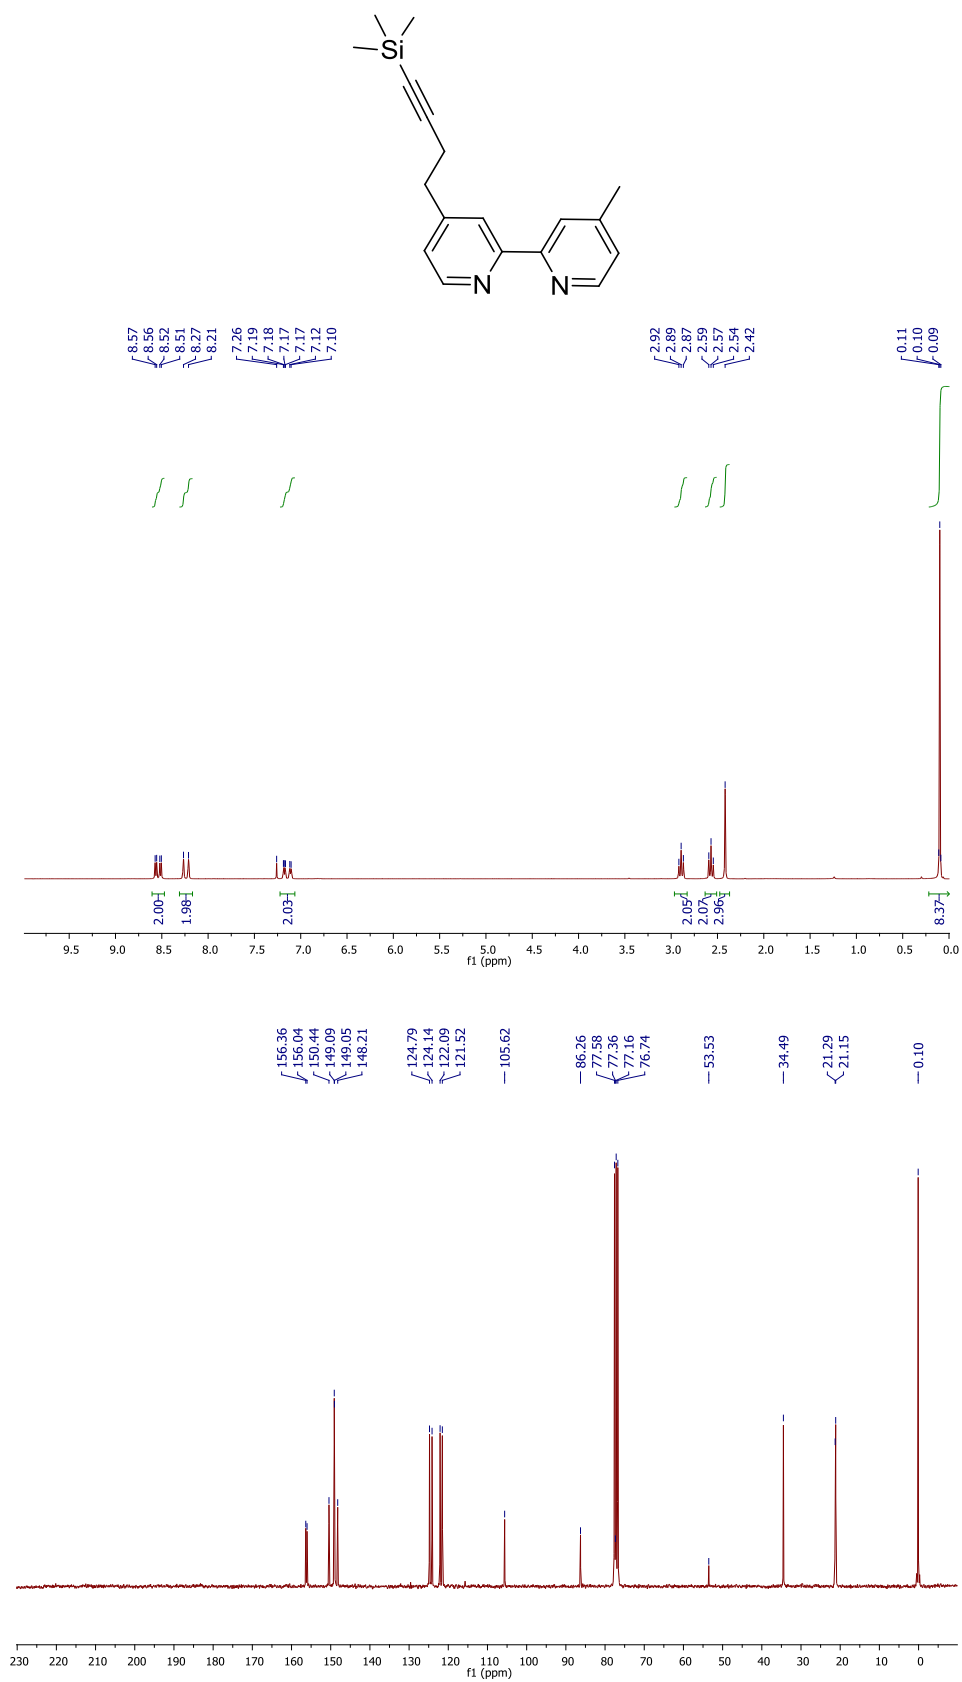

d.  $^1\text{H}$  and  $^{13}\text{C}$  NMR spectra for compound (6)

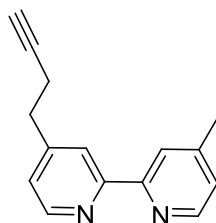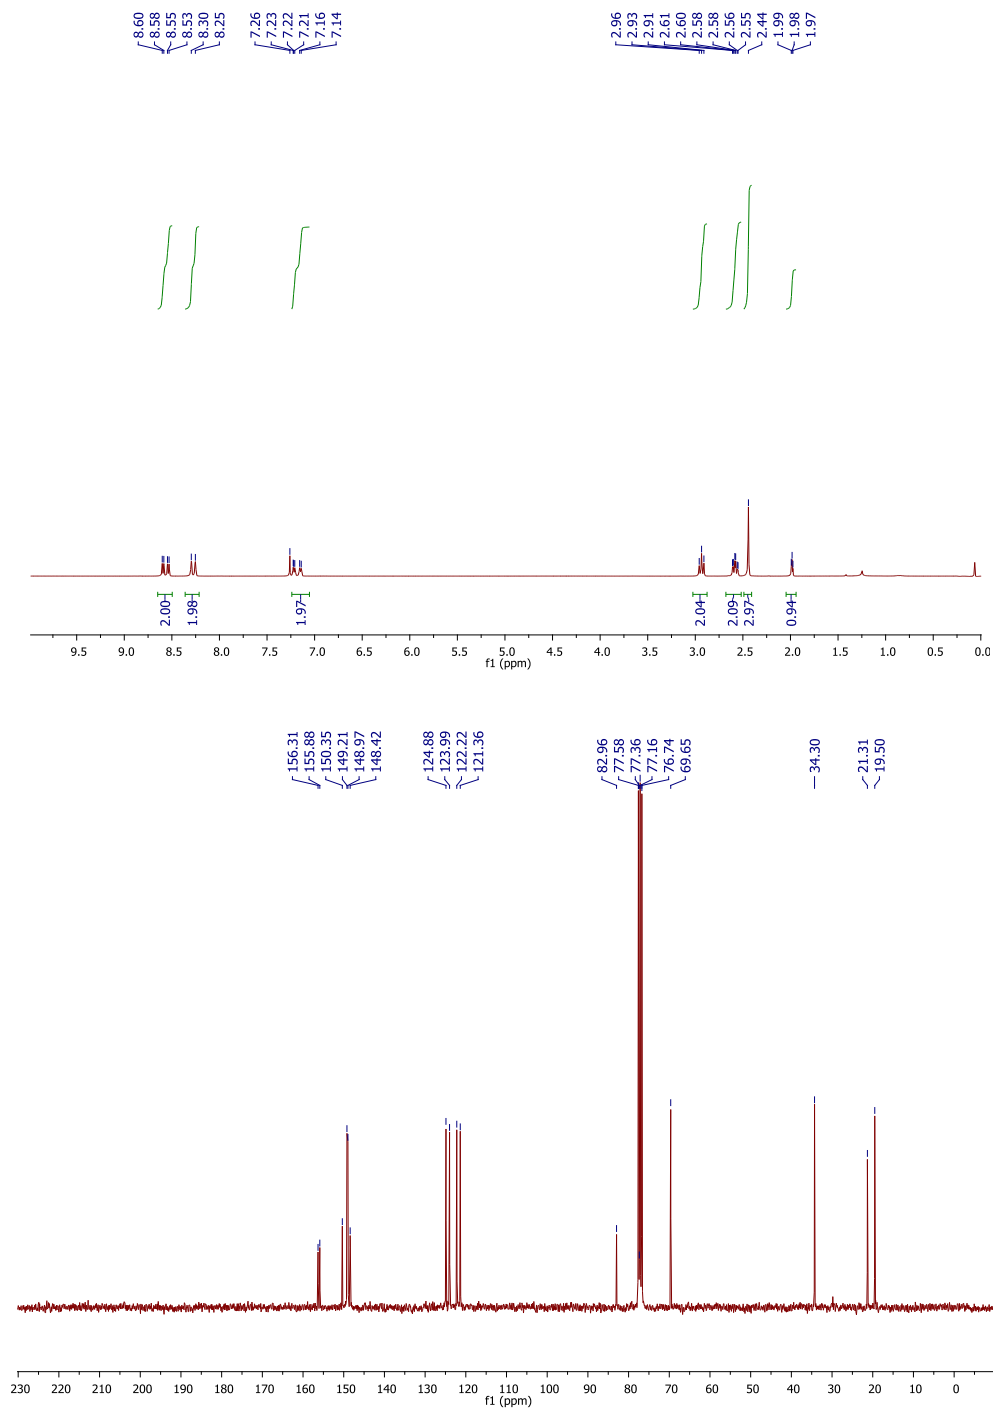

e.  $^1\text{H}$  and  $^{13}\text{C}$  NMR spectra of compound (14)

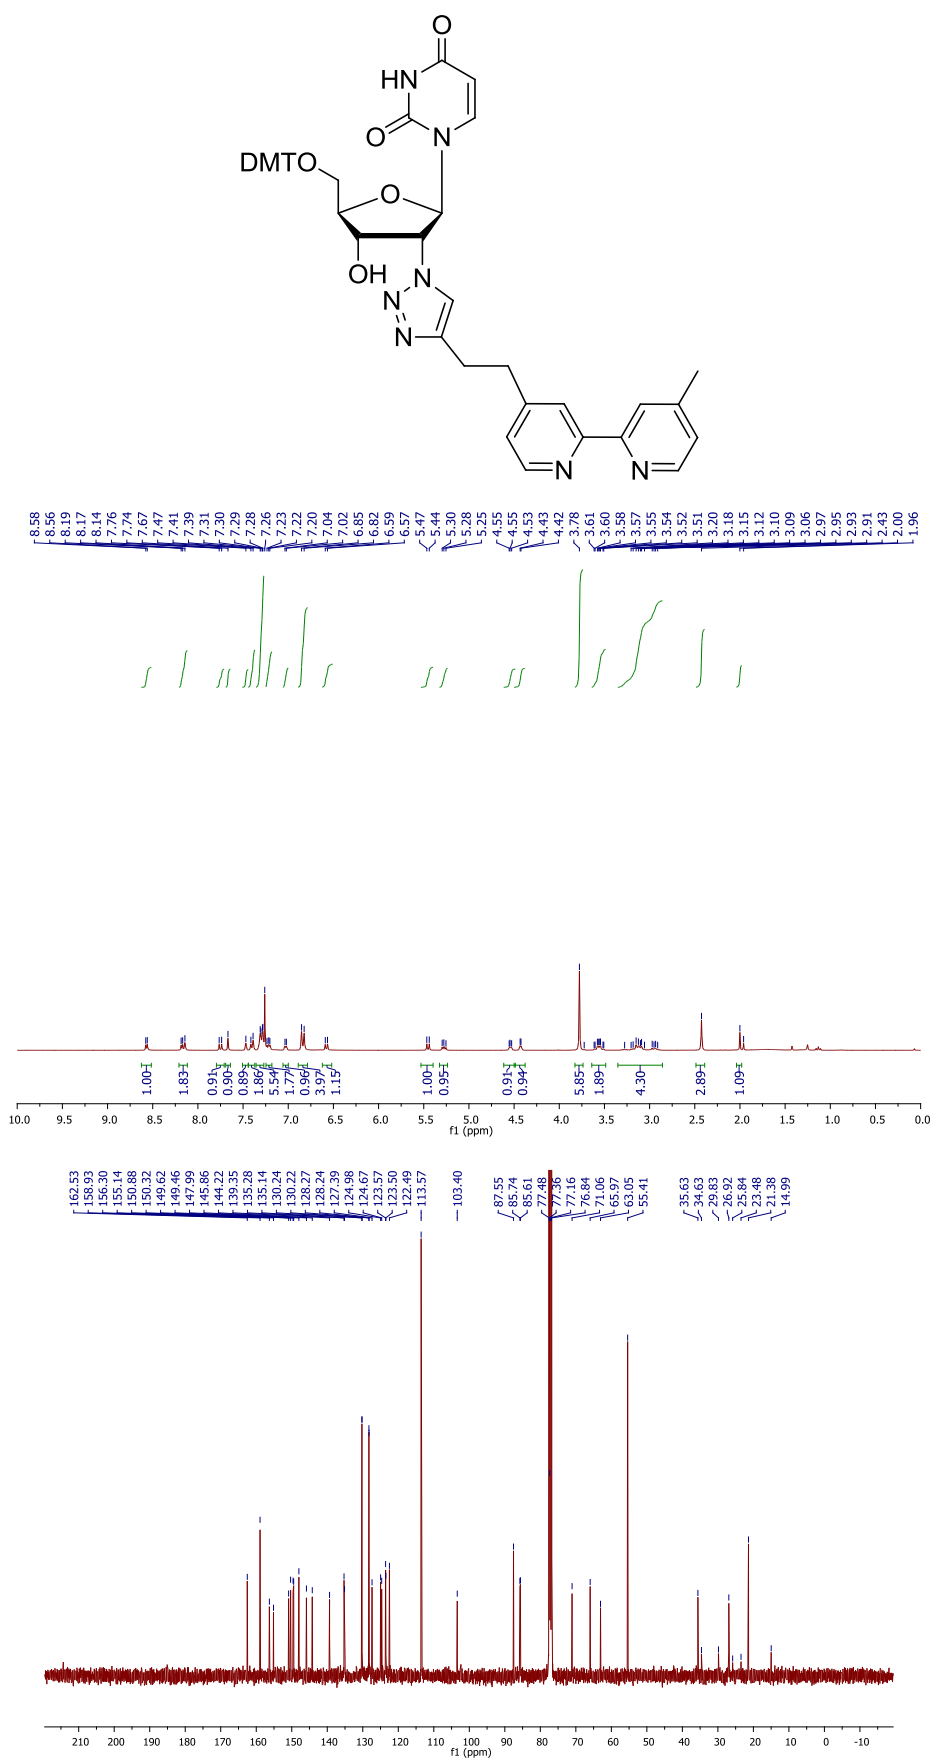

f.  $^1\text{H}$ ,  $^{13}\text{C}$  and  $^{31}\text{P}$  NMR spectra of compound (15)

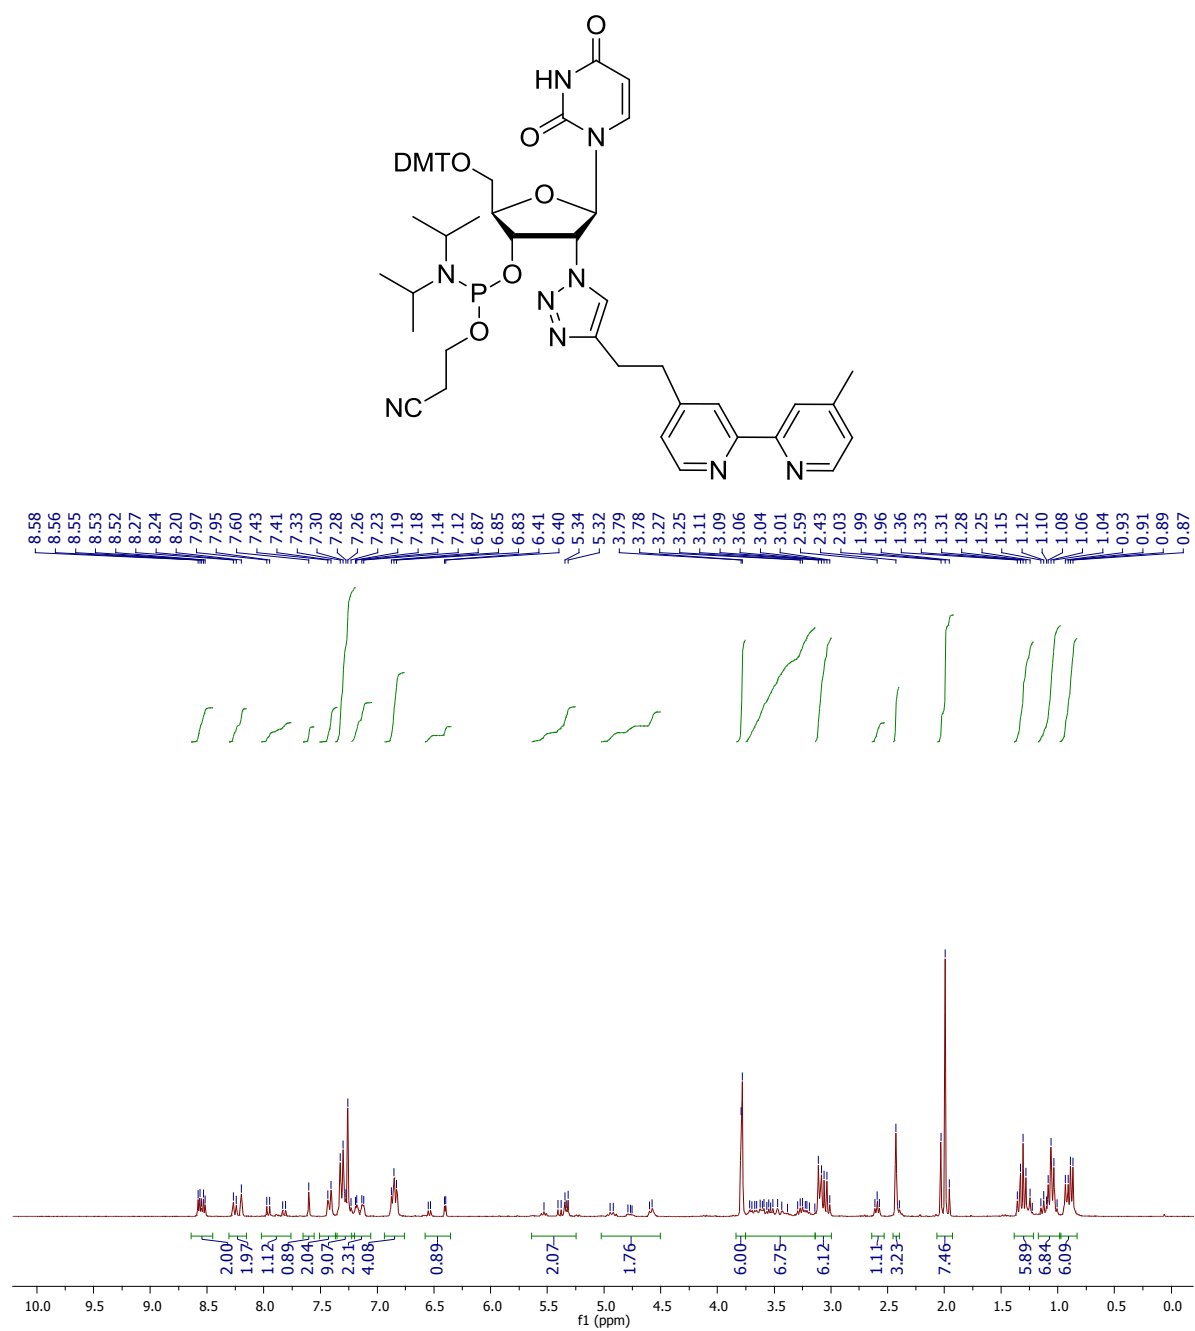



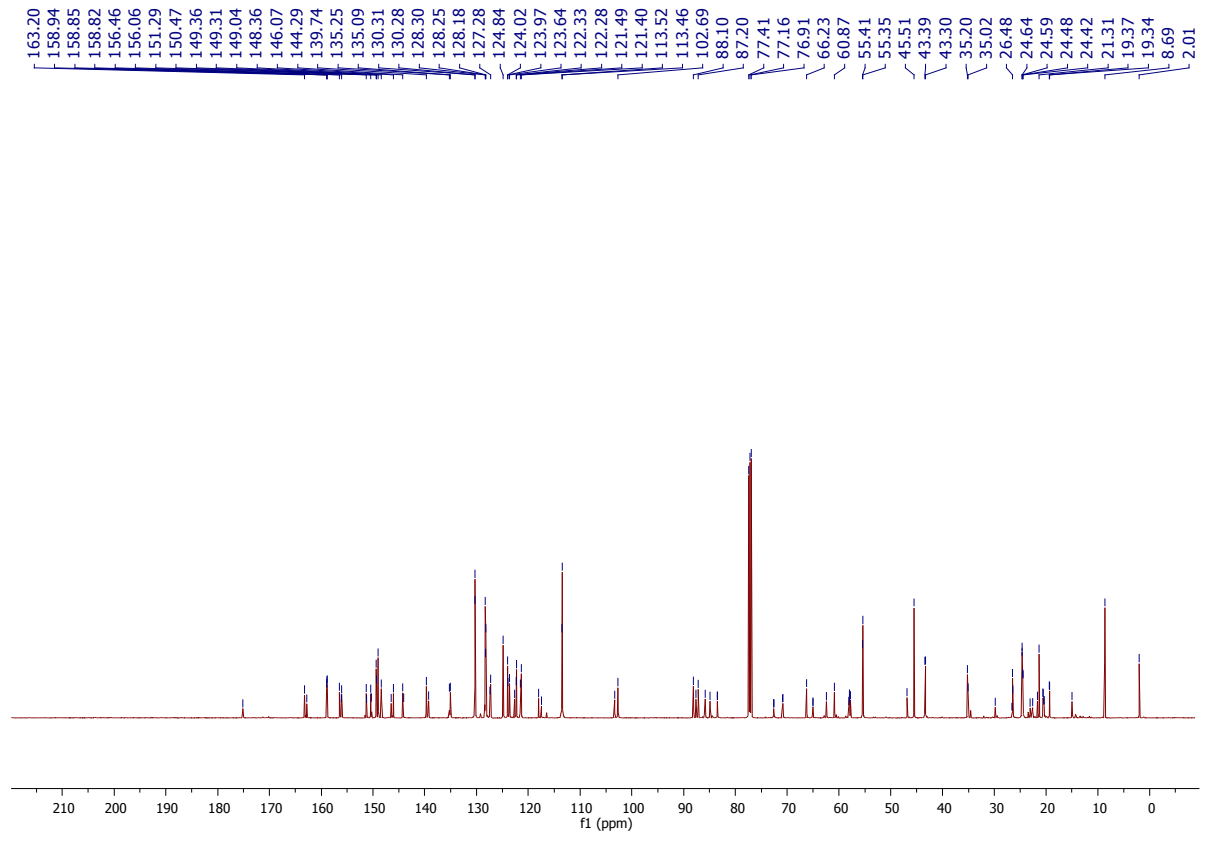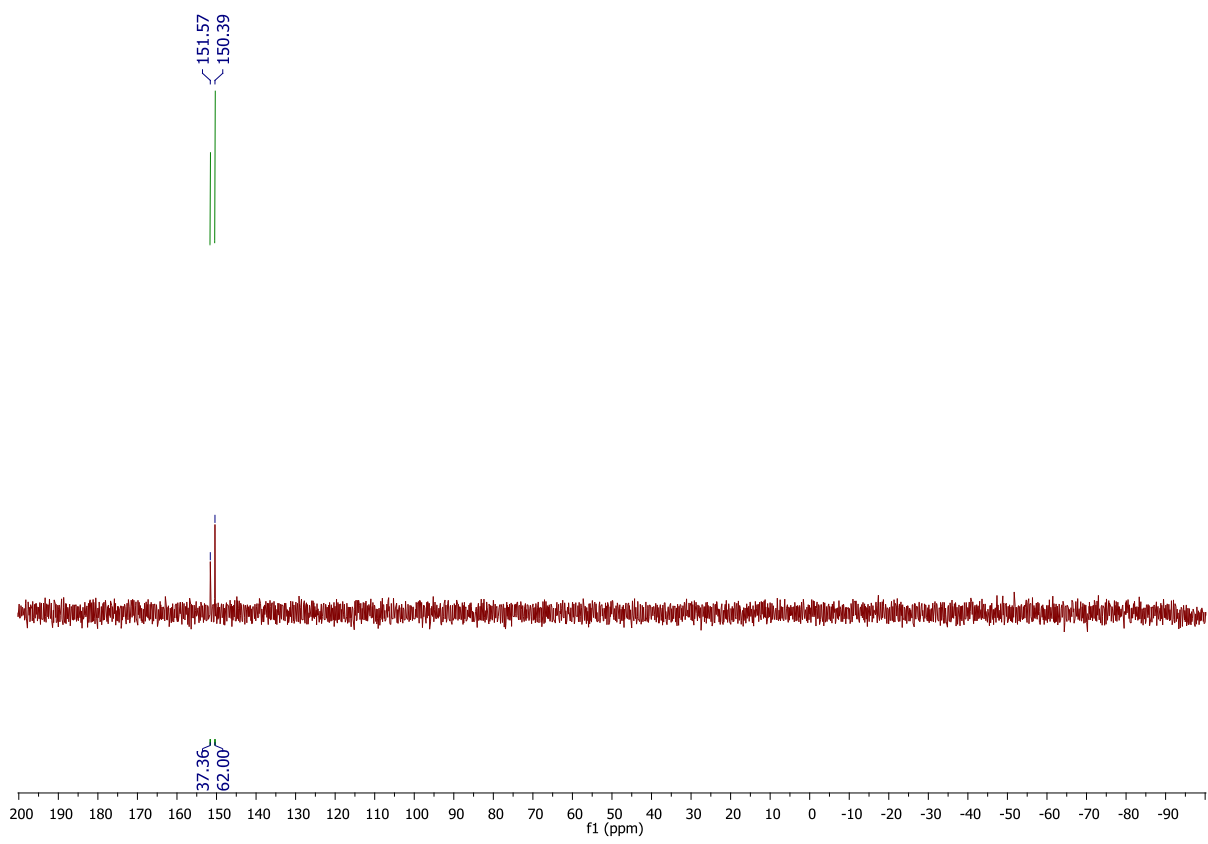

g.  $^1\text{H}$  and  $^{13}\text{C}$  spectra of compound (18e)

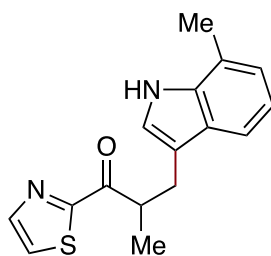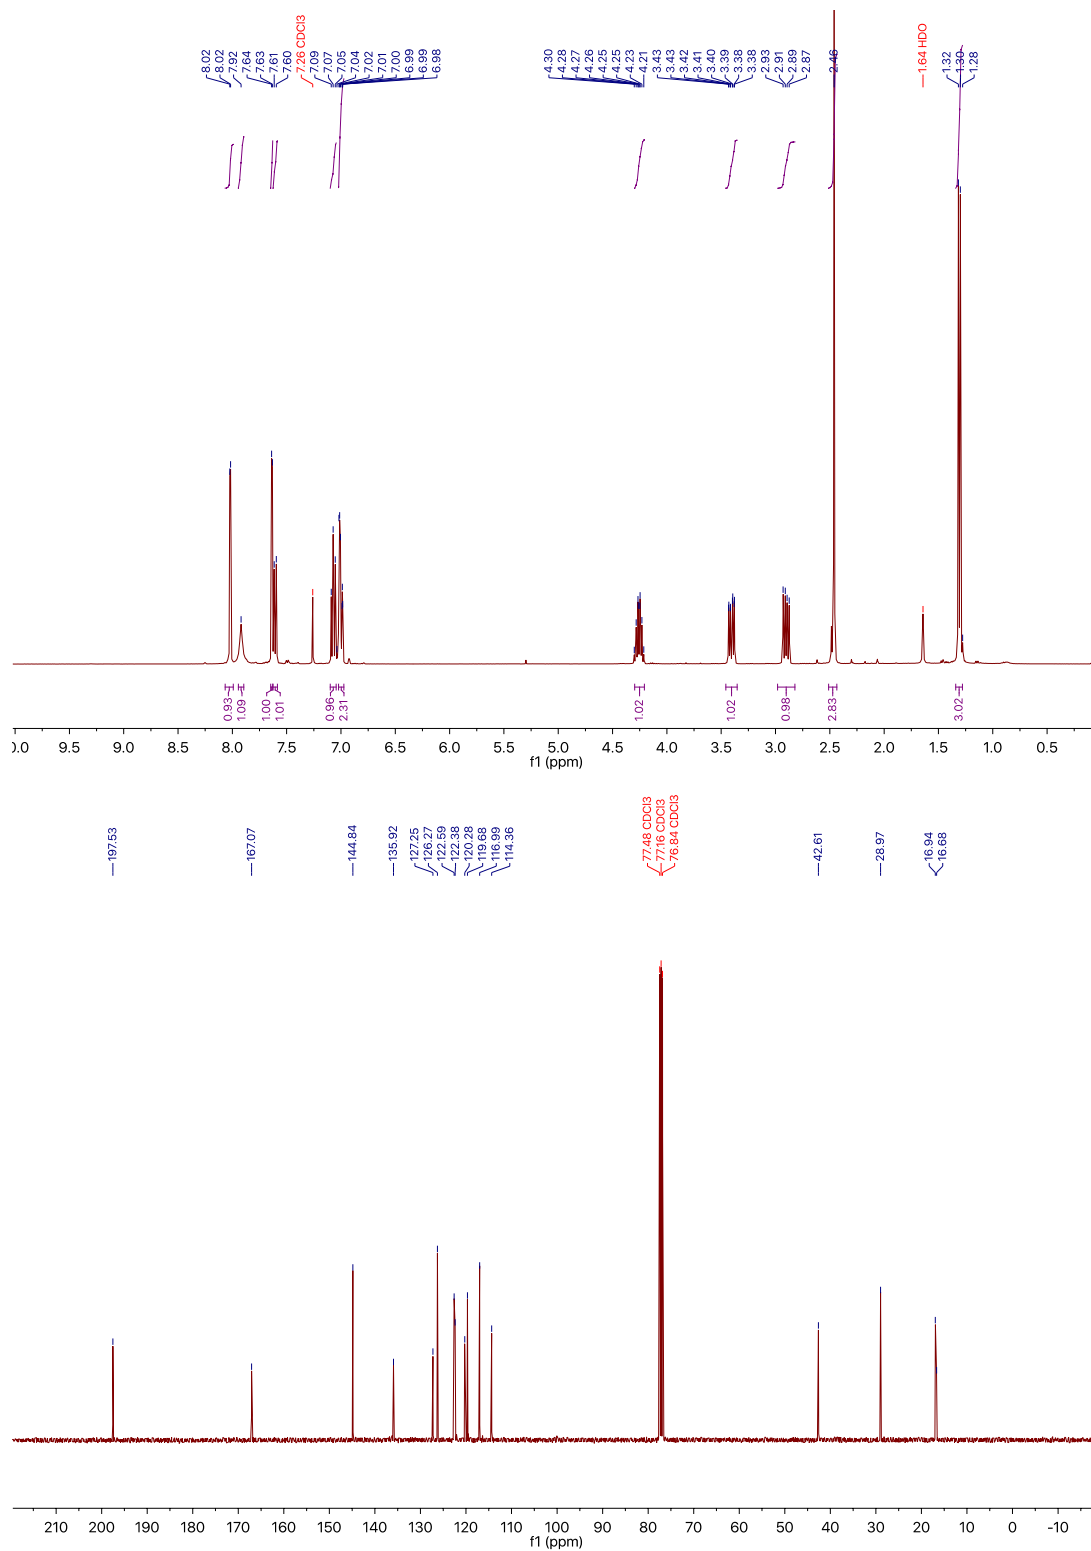

**h.  $^1\text{H}$  and  $^{13}\text{C}$  NMR spectra of compound (18f)**

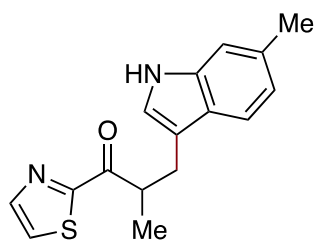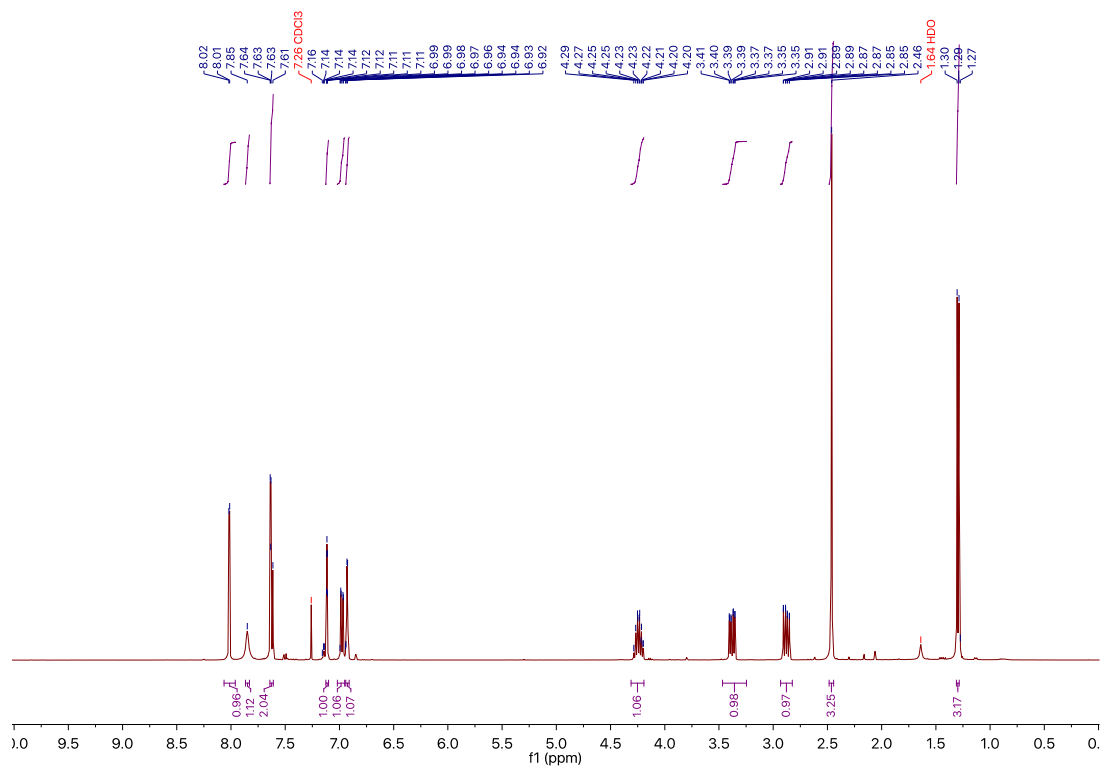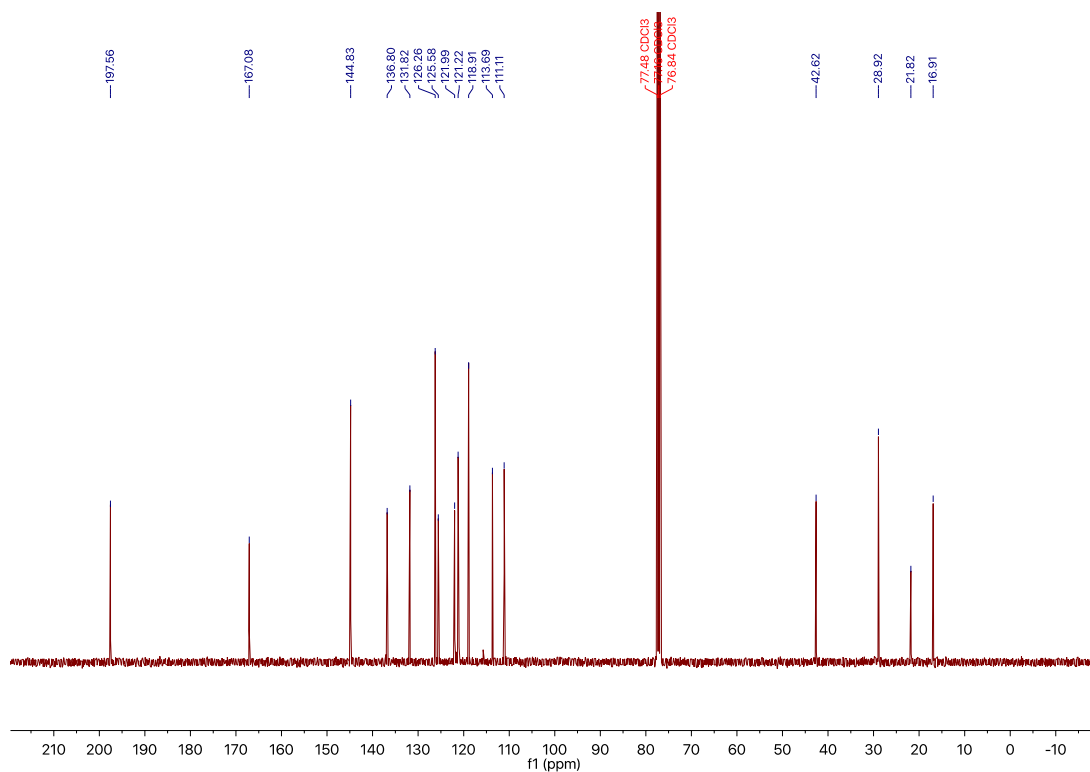

i.  $^1\text{H}$ ,  $^{13}\text{C}$  and  $^{19}\text{F}$  NMR spectra of compound (18i)

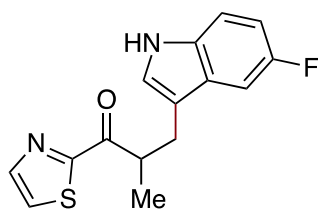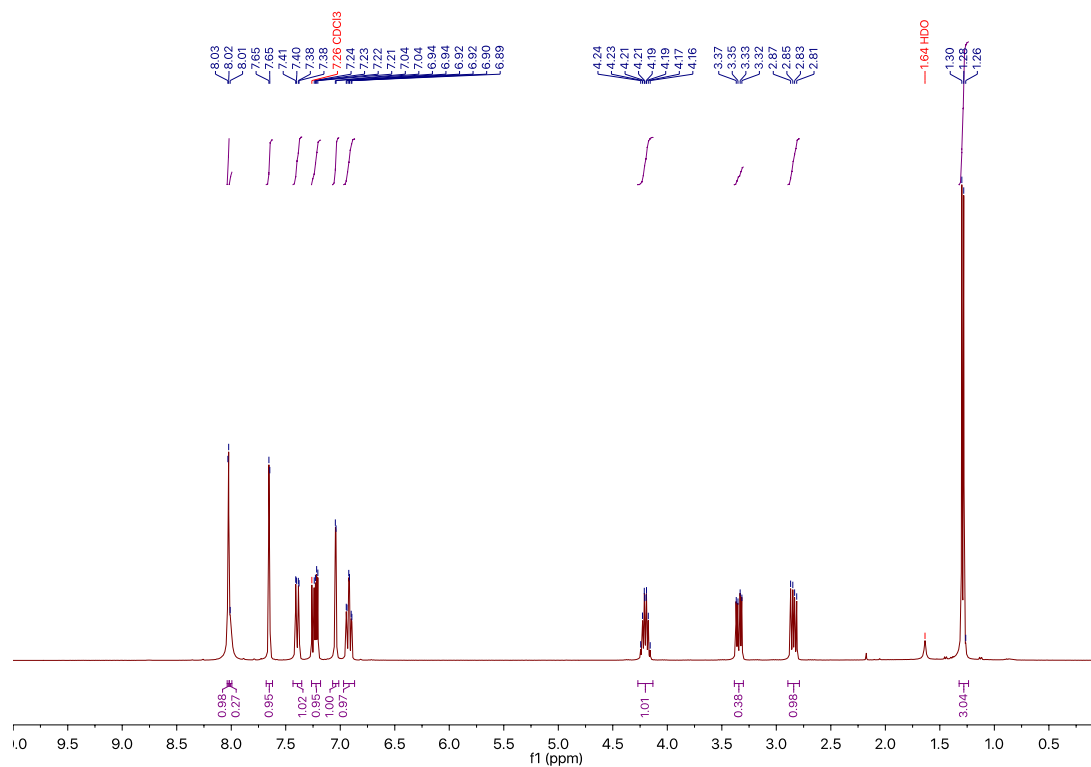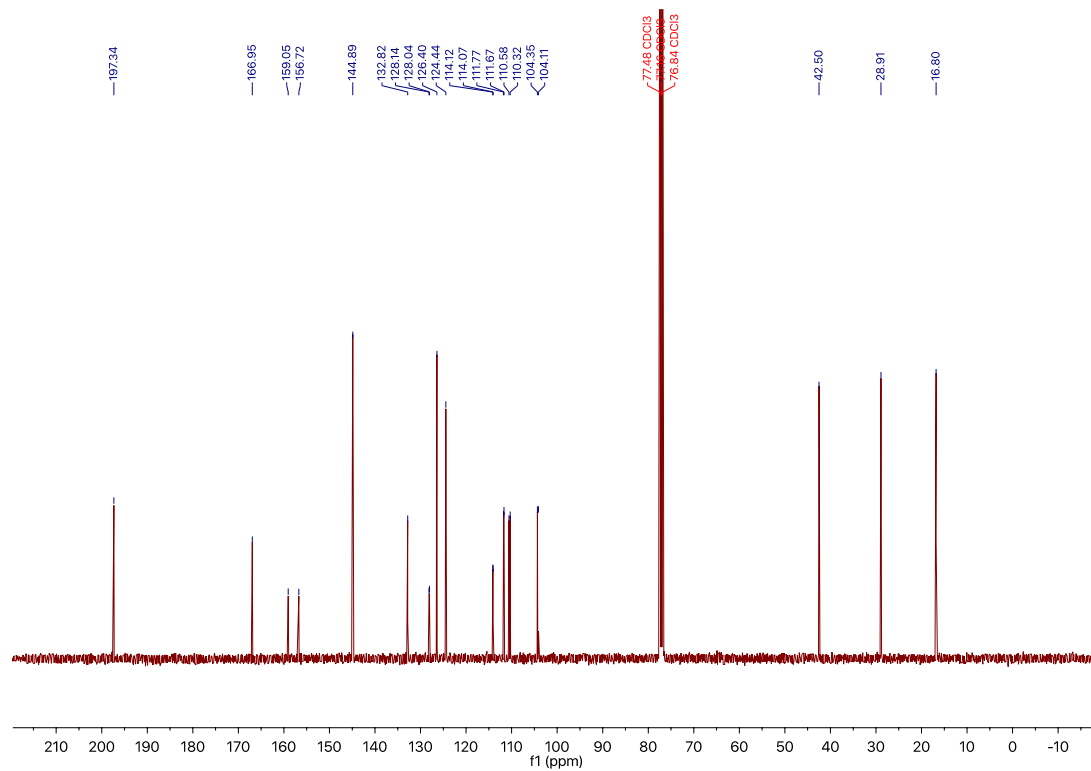

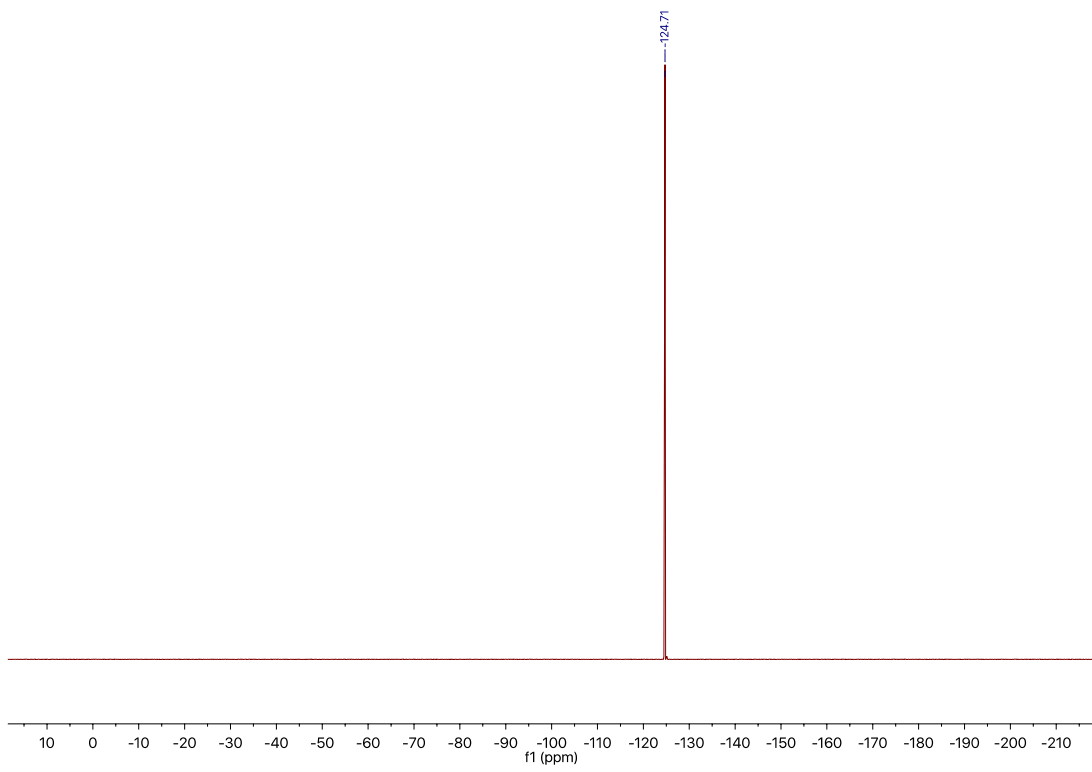

j.  $^1\text{H}$  and  $^{13}\text{C}$  NMR spectra of compound (18l)

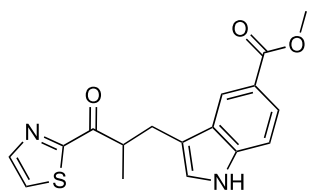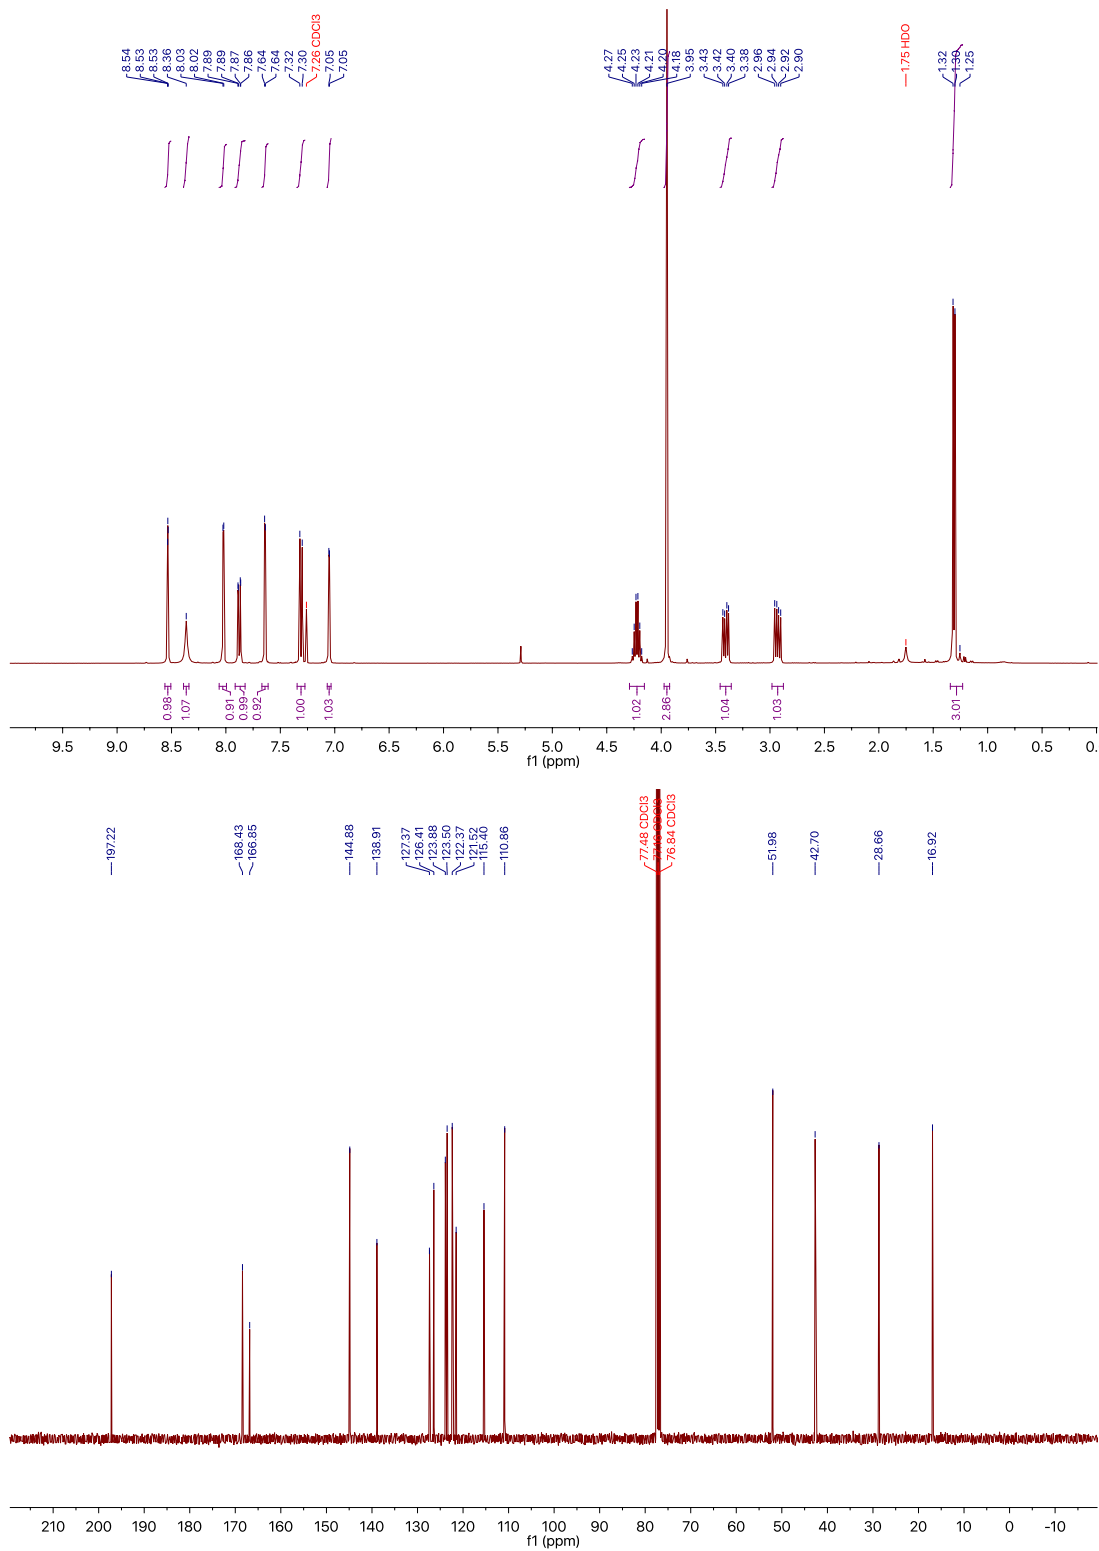

## VI. Results of catalysis : HPLC chromatograms

### a. HPLC chromatograms of compound (18a)

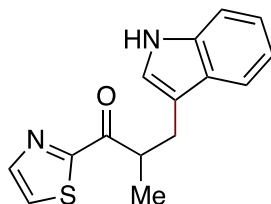

**Racemic** [Chiralpak IA column, 250 bar, T = 30 °C, *n*-Hexane/*i*-PrOH = 97:3, 1 mL/min,  $\lambda$  = 280 nm,  $t_R$  = 44.430 min and  $t_R$  = 53.322 min].

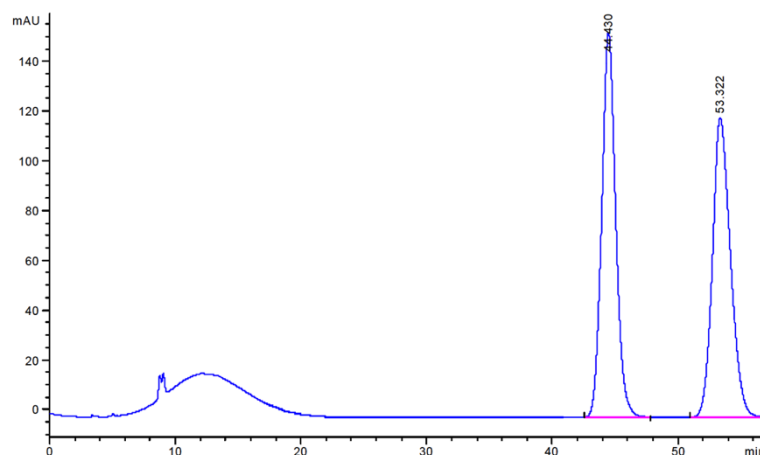

| Peak# | RetentionTime<br>min | Rel. Area<br>% |
|-------|----------------------|----------------|
| 1     | 44.430               | 49.9295        |
| 2     | 53.322               | 50.0705        |

**Indole** [Chiralpak IA column, 250 bar, T = 30 °C, *n*-Hexane/*i*-PrOH = 97:3, 1 mL/min,  $\lambda$  = 280 nm,  $t_R$  = 13.494 min].

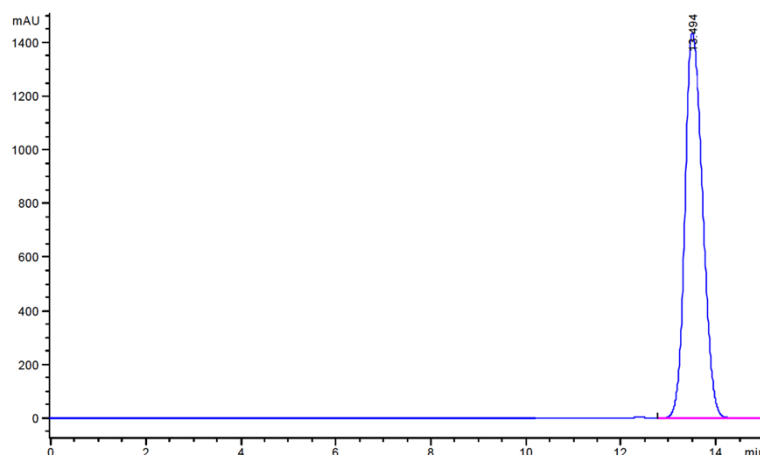

**Following the general procedure A.** HPLC analysis of the crude residue indicated a ratio indole/**18a** of 5:95 and an enantiomeric excess of (+) **21** [Chiralpak IA column, 250 bar, T = 30 °C, *n*-Hexane/*i*-PrOH = 97:3, 1 mL/min,  $\lambda$  = 280 nm,  $t_R$  = 51.196 min and  $t_R$  = 58.355 min].

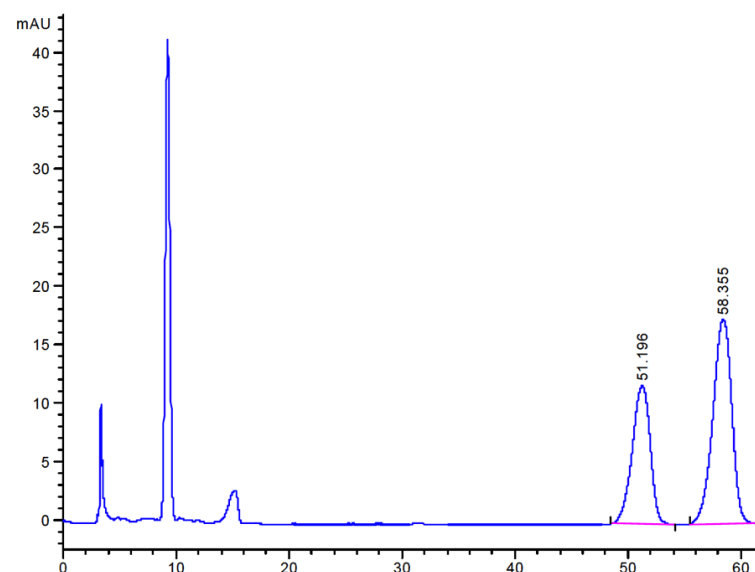

| Peak# | RetentionTime<br>min | Rel.Area<br>% |
|-------|----------------------|---------------|
| 1     | 51.196               | 39.3979       |
| 2     | 58.355               | 60.6021       |

**Following the general procedure B.** HPLC analysis of the crude residue indicated a ratio indole/**18a** of 13:87 and an enantiomeric excess of (+) **40** [Chiralpak IA column, 250 bar, T = 30 °C, *n*-Hexane/*i*-PrOH = 97:3, 1 mL/min,  $\lambda$  = 280 nm,  $t_R$  = 44.668 min and  $t_R$  = 53.437 min].

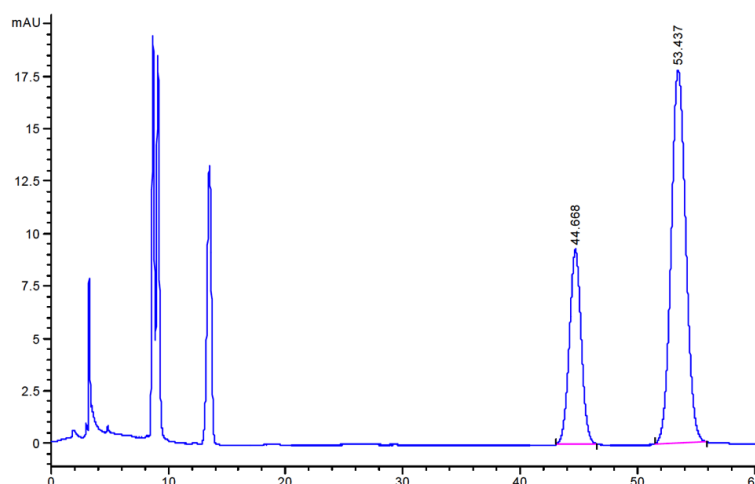

| Peak# | RetentionTime<br>min | Rel.Area<br>% |
|-------|----------------------|---------------|
| 1     | 44.668               | 29.8503       |
| 2     | 53.437               | 70.1497       |



**Following the general procedure C.** HPLC analysis of the crude residue indicated a ratio indole/**18a** of 70:30 and an enantiomeric excess of (-) 20 [Chiralpak IA column, 250 bar, T = 30 °C, *n*-Hexane/*i*-PrOH = 97:3, 1 mL/min,  $\lambda$  = 280 nm,  $t_R$  = 45.948 min and  $t_R$  = 52.906 min].

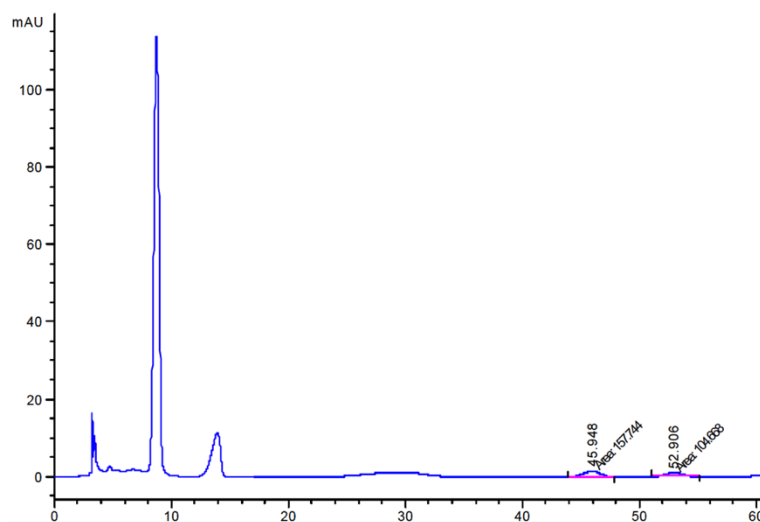

| Peak# | RetentionTime<br>min | Rel.Area<br>% |
|-------|----------------------|---------------|
| 1     | 45.948               | 60.1132       |
| 2     | 52.906               | 39.8868       |

**Following the general procedure D.** HPLC analysis of the crude residue indicated a ratio indole/**18a** of 24:76 and an enantiomeric excess of (-) 80 [Chiralpak IA column, 250 bar, T = 30 °C, *n*-Hexane/*i*-PrOH = 97:3, 1 mL/min,  $\lambda$  = 280 nm,  $t_R$  = 45.162 min and  $t_R$  = 54.145 min].

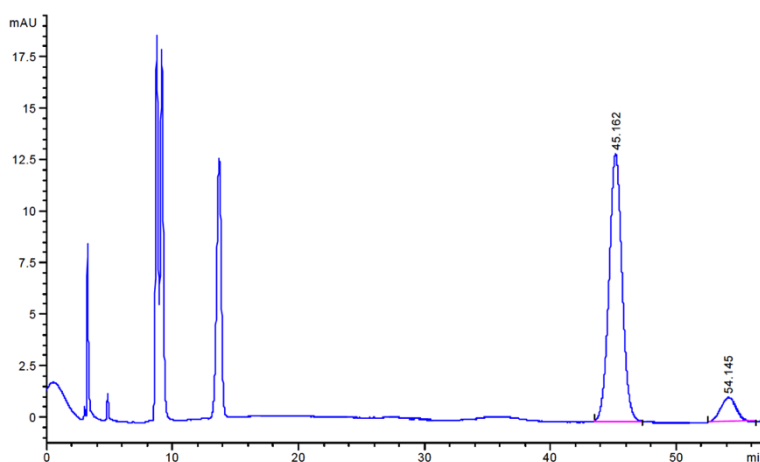

| Peak# | RetentionTime<br>min | Rel.Area<br>% |
|-------|----------------------|---------------|
| 1     | 45.162               | 90.0588       |
| 2     | 54.145               | 9.9412        |

**Following the general procedure E.** HPLC analysis of the crude residue indicated a ratio indole/**18a** of 70:30 and an enantiomeric excess of (+) **7** [Chiralpak IA column, 250 bar, T = 30 °C, *n*-Hexane/*i*-PrOH = 97:3, 1 mL/min,  $\lambda$  = 280 nm,  $t_R$  = 45.641 min and  $t_R$  = 51.833 min].

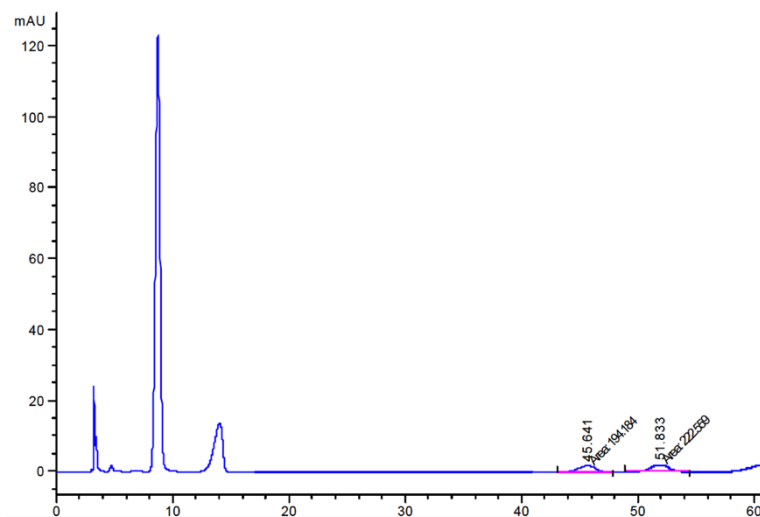

| Peak# | RetentionTime | Rel.Area |
|-------|---------------|----------|
|       | min           | %        |
| 1     | 45.641        | 46.5957  |
| 2     | 51.833        | 53.4043  |

### b. HPLC chromatograms of compound (18b)

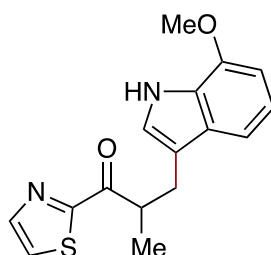

**Racemic** [Chiralpak IB column, 100 bar, T = 20 °C, *n*-Heptane (+ 0.1% diethylamine)/EtOH (+ 0.1% diethylamine) = 95:5, 1 mL/min,  $\lambda$  = 300 nm,  $t_R$  = 23.083 min and  $t_R$  = 27.820 min].

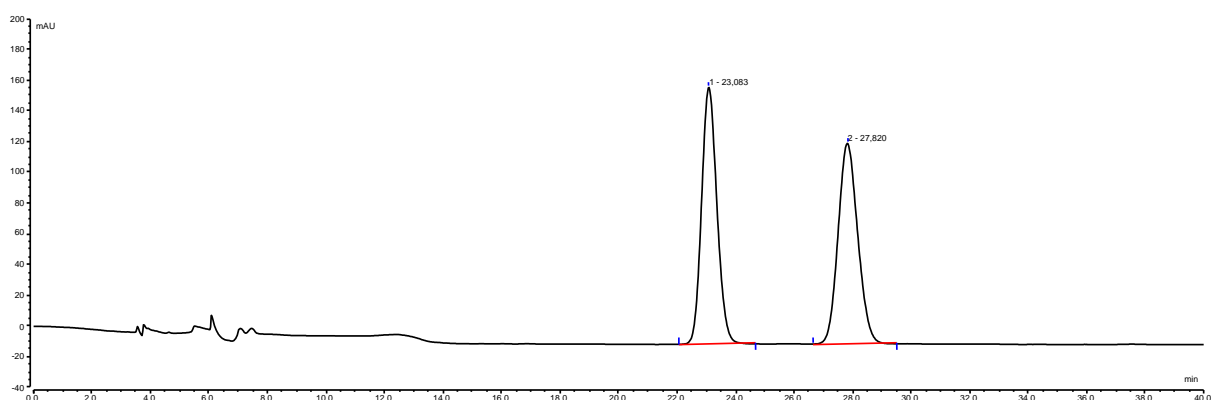

| Peak Name | Retention Time<br>min | Rel.Area<br>% |
|-----------|-----------------------|---------------|
| 1         | 23,083                | 50,04         |
| 2         | 27,82                 | 49,96         |

**Indole** [Chiralpak IB column, 100 bar, T = 20 °C, *n*-Heptane (+ 0.1% diethylamine)/EtOH (+ 0.1% diethylamine) = 95:5, 1 mL/min,  $\lambda$  = 300 nm,  $t_R$  = 9.053 min].

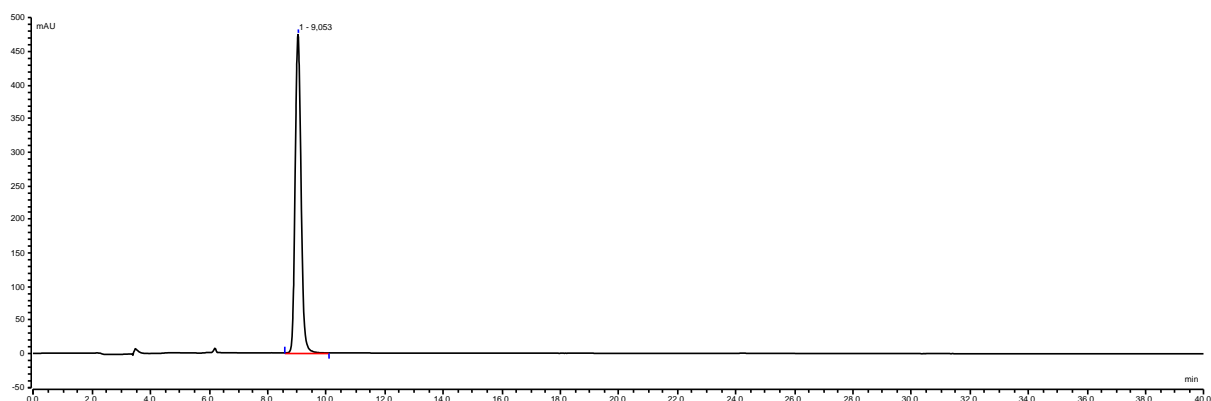

| Peak Name | Retention Time<br>min | Rel.Area<br>% |
|-----------|-----------------------|---------------|
| 1         | 9,053                 | 100           |

**Following the general procedure A.** HPLC analysis of the crude residue indicated a ratio indole/**18b** of 4:96 and an enantiomeric excess of (+) 17 [Chiralpak IB column, 100 bar, T = 20 °C, *n*-Heptane (+ 0.1% diethylamine)/EtOH (+ 0.1% diethylamine) = 95:5, 1 mL/min,  $\lambda$  = 300 nm,  $t_R$  = 21.600 min and  $t_R$  = 26.183 min].

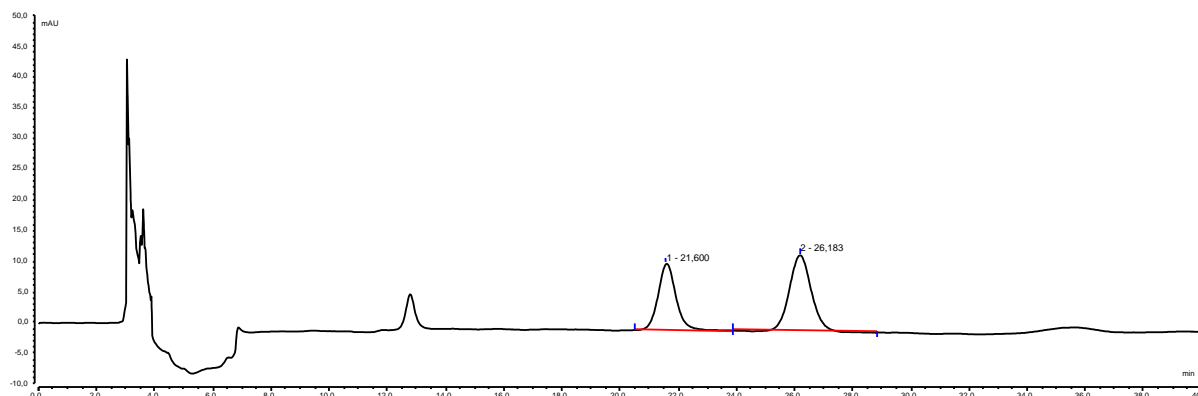

| Peak Name | Retention Time<br>min | Rel.Area<br>% |
|-----------|-----------------------|---------------|
| 1         | 21,6                  | 41,4          |
| 2         | 26,183                | 58,6          |

**Following the general procedure B.** HPLC analysis of the crude residue indicated a ratio indole/**18b** of 20:80 and an enantiomeric excess of (+) 38 [Chiralpak IB column, 100 bar, T = 20 °C, *n*-Heptane (+ 0.1% diethylamine)/EtOH (+ 0.1% diethylamine) = 95:5, 1 mL/min,  $\lambda$  = 300 nm,  $t_R$  = 23.207 min and  $t_R$  = 27.953 min].

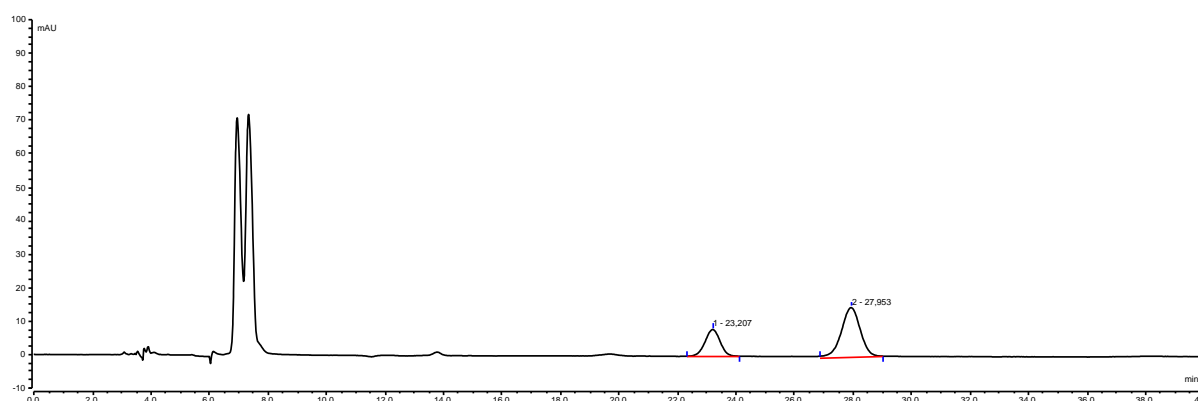

| Peak Name | Retention Time<br>min | Rel.Area<br>% |
|-----------|-----------------------|---------------|
| 1         | 23,207                | 31,02         |
| 2         | 27,953                | 68,98         |

**Following the general procedure C.** HPLC analysis of the crude residue indicated a ratio indole/**18b** of 48:52 and an enantiomeric excess of (-) 12 [Chiralpak IB column, 100 bar, T = 20 °C, *n*-Heptane (+ 0.1% diethylamine)/EtOH (+ 0.1% diethylamine) = 95:5, 1 mL/min,  $\lambda$  = 300 nm,  $t_R$  = 23.213 min and  $t_R$  = 28.000 min].

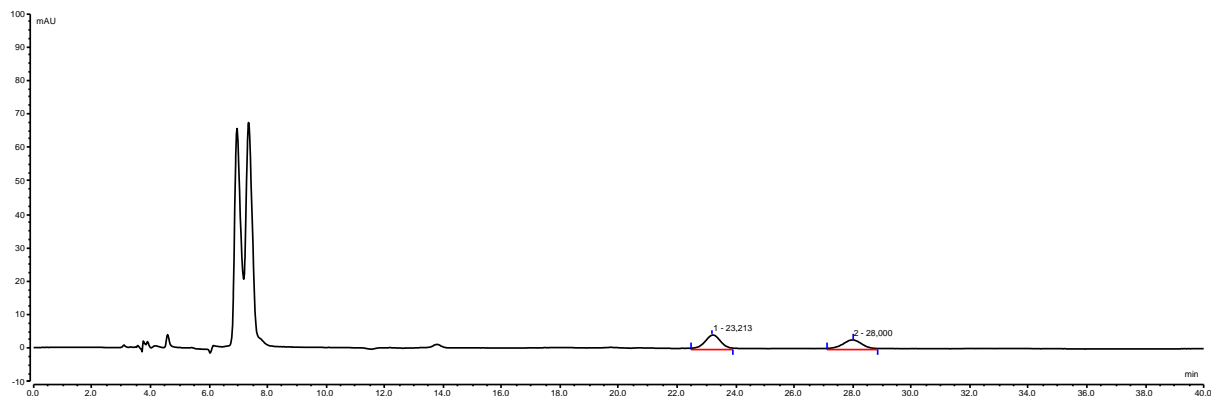

| Peak Name | Retention Time<br>min | Rel.Area<br>% |
|-----------|-----------------------|---------------|
| 1         | 23,213                | 56,18         |
| 2         | 28                    | 43,82         |

**Following the general procedure D.** HPLC analysis of the crude residue indicated a ratio indole/**18b** of 22:78 and an enantiomeric excess of (-) 86 [Chiralpak IB column, 100 bar, T = 20 °C, *n*-Heptane (+ 0.1% diethylamine)/EtOH (+ 0.1% diethylamine) = 95:5, 1 mL/min,  $\lambda$  = 300 nm,  $t_R$  = 23.200 min and  $t_R$  = 27.993 min].

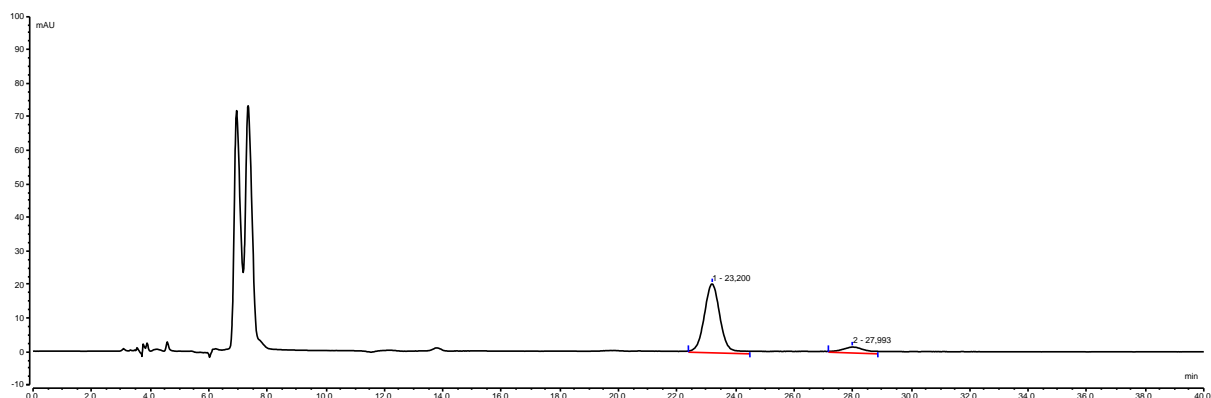

| Peak Name | Retention Time<br>min | Rel.Area<br>% |
|-----------|-----------------------|---------------|
| 1         | 23,2                  | 93,02         |
| 2         | 27,993                | 6,98          |

**Following the general procedure E.** HPLC analysis of the crude residue indicated a ratio indole/**18b** of 68:32 and an enantiomeric excess of (-) **29** [Chiralpak IB column, 100 bar, T = 20 °C, *n*-Heptane (+ 0.1% diethylamine)/EtOH (+ 0.1% diethylamine) = 95:5, 1 mL/min,  $\lambda$  = 300 nm,  $t_R$  = 23.270 min and  $t_R$  = 28.037 min].

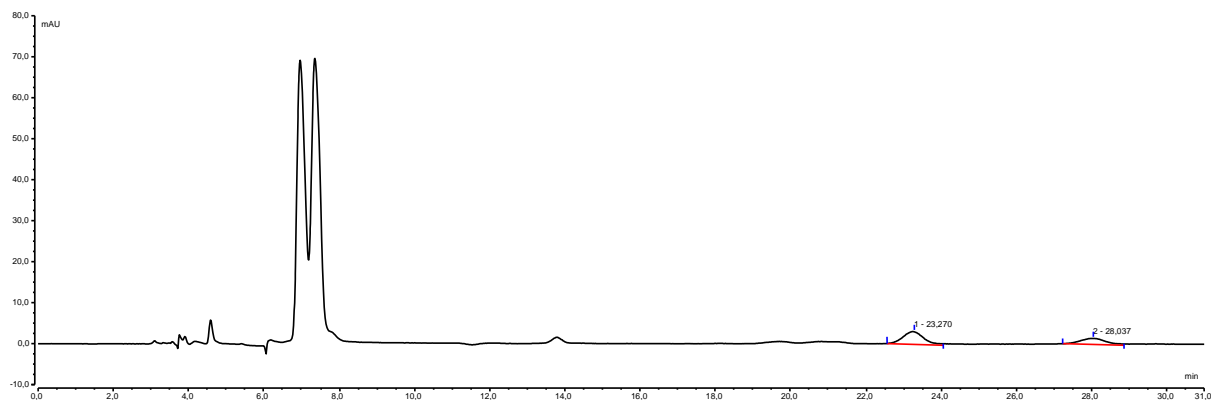

| Peak Name | Retention Time<br>min | Rel.Area<br>% |
|-----------|-----------------------|---------------|
| 1         | 23,27                 | 64,64         |
| 2         | 28,037                | 35,36         |

c. HPLC chromatograms of compound (18c)

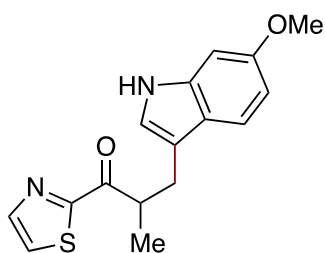

**Racemic** [Chiralpak IA column, 100 bar, T = 25°C, *n*-Heptane (+ 0.1% diethylamine)/EtOH (+ 0.1% diethylamine) = 95:5, 1 mL/min,  $\lambda$  = 300 nm,  $t_R$  = 33.767 min and  $t_R$  = 52.823 min].

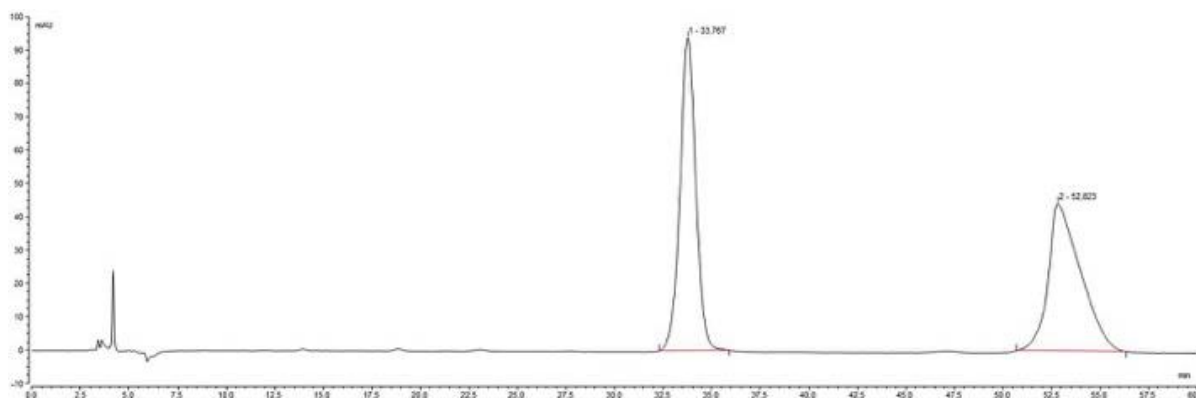

| Peak Name | Retention Time<br>min | Rel.Area<br>% |
|-----------|-----------------------|---------------|
| 1         | 33,767                | 50,9          |
| 2         | 52,823                | 49,1          |

**Indole** [Chiralpak IA column, 100 bar, T = 25 °C, *n*-Heptane (+ 0.1% diethylamine)/EtOH (+ 0.1% diethylamine) = 95:5, 1 mL/min,  $\lambda$  = 300 nm,  $t_R$  = 13.497 min].

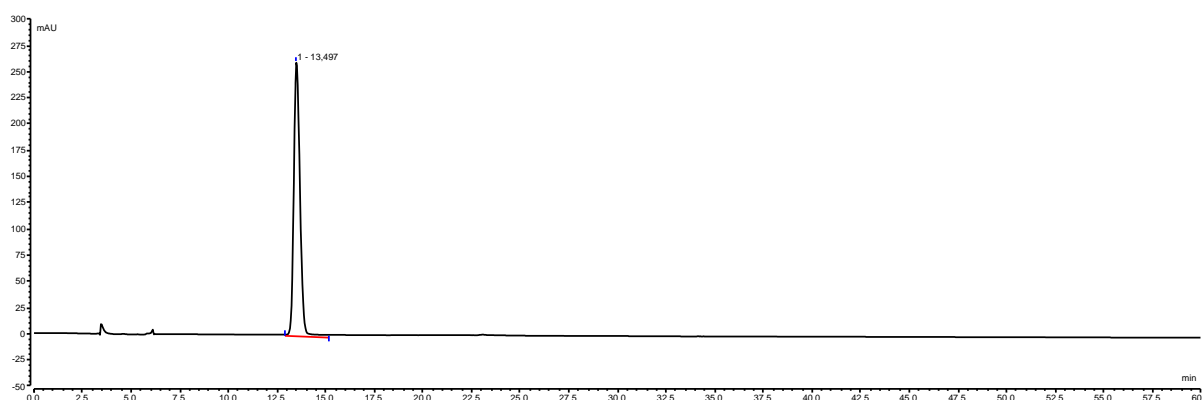

| Peak Name | Retention Time<br>min | Rel.Area<br>% |
|-----------|-----------------------|---------------|
| 1         | 13,497                | 100           |

**Following the general procedure A.** HPLC analysis of the crude residue indicated a ratio indole/**18c** of 12:88 and an enantiomeric excess of (+) **29** [Chiralpak IA column, 100 bar, T = 25 °C, *n*-Heptane (+ 0.1% diethylamine)/EtOH (+ 0.1% diethylamine) = 95:5, 1 mL/min,  $\lambda$  = 300 nm,  $t_R$  = 33.633 min and  $t_R$  = 53.603 min].

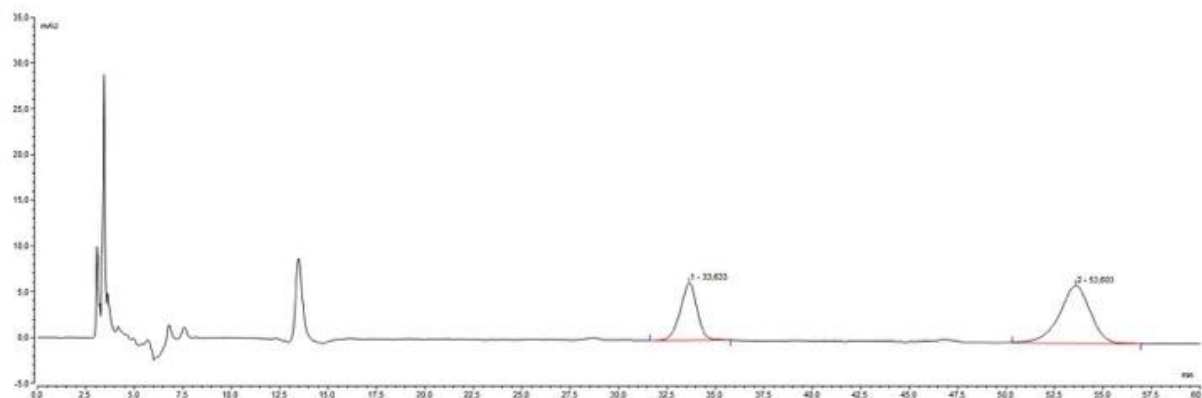

| Peak Name | Retention Time<br>min | Rel.Area<br>% |
|-----------|-----------------------|---------------|
| 1         | 33,633                | 35,28         |
| 2         | 53,603                | 64,72         |

**Following the general procedure B.** HPLC analysis of the crude residue indicated a ratio indole/**18c** of 35:65 and an enantiomeric excess of (+) **5** [Chiralpak IA column, 100 bar, T = 25 °C, *n*-Heptane (+ 0.1% diethylamine)/EtOH (+ 0.1% diethylamine) = 95:5, 1 mL/min,  $\lambda$  = 300 nm,  $t_R$  = 33.163 min and  $t_R$  = 52.503 min].

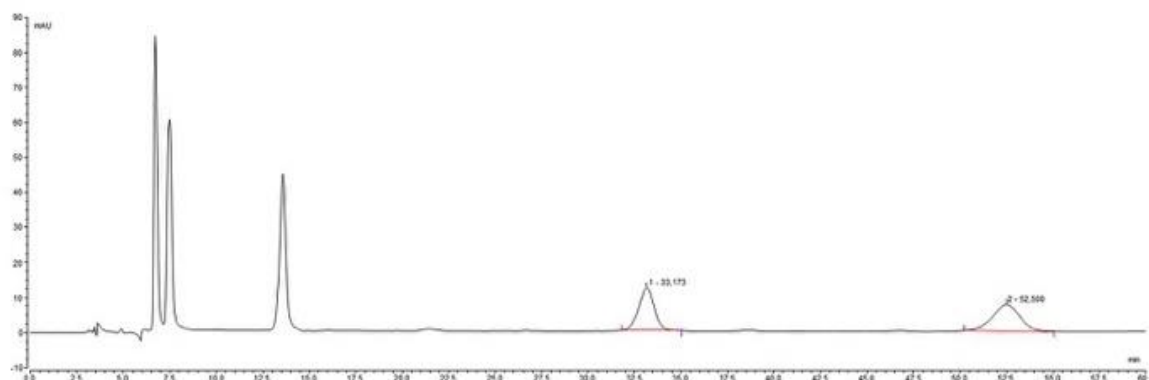

| Peak Name | Retention Time<br>min | Rel.Area<br>% |
|-----------|-----------------------|---------------|
| 1         | 33,163                | 47,62         |
| 2         | 52,503                | 52,38         |



**Following the general procedure C.** HPLC analysis of the crude residue indicated a ratio indole/**18c** of 56:44 and an enantiomeric excess of (-) **16** [Chiralpak IA column, 100 bar, T = 25 °C, *n*-Heptane (+ 0.1% diethylamine)/EtOH (+ 0.1% diethylamine) = 95:5, 1 mL/min,  $\lambda$  = 300 nm,  $t_R$  = 33.193 min and  $t_R$  = 52.633 min].

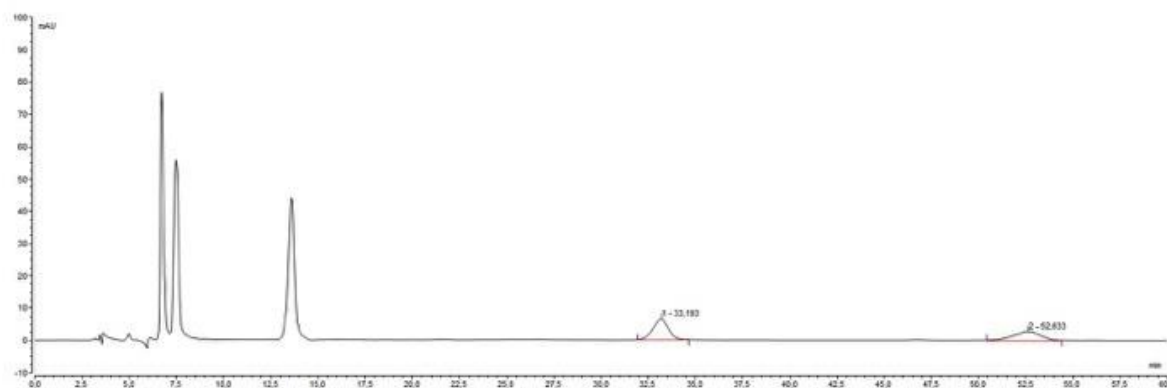

| Peak Name | Retention Time<br>min | Rel.Area<br>% |
|-----------|-----------------------|---------------|
| 1         | 33,193                | 58,09         |
| 2         | 52,633                | 41,91         |

**Following the general procedure D.** HPLC analysis of the crude residue indicated a ratio indole/**18c** of 36:64 and an enantiomeric excess of (-) **86** [Chiralpak IA column, 100 bar, T = 25 °C, *n*-Heptane (+ 0.1% diethylamine)/EtOH (+ 0.1% diethylamine) = 95:5, 1 mL/min,  $\lambda$  = 300 nm,  $t_R$  = 33.150 min and  $t_R$  = 52.657 min].

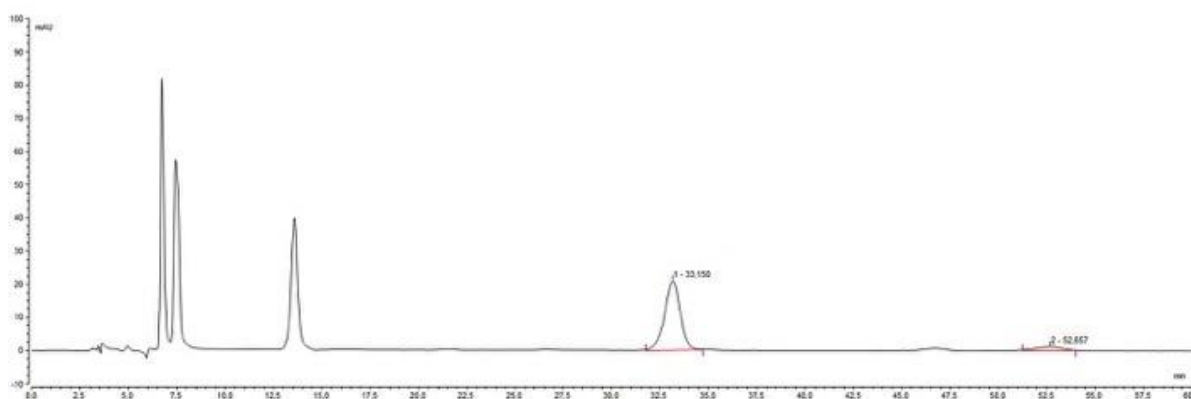

| Peak Name | Retention Time<br>min | Rel.Area<br>% |
|-----------|-----------------------|---------------|
| 1         | 33,15                 | 93,19         |
| 2         | 52,657                | 6,81          |

**Following the general procedure E.** HPLC analysis of the crude residue indicated a ratio indole/**18c** of 79:21 and an enantiomeric excess of (-) **19** [Chiralpak IA column, 100 bar, T = 25 °C, *n*-Heptane (+ 0.1% diethylamine)/EtOH (+ 0.1% diethylamine) = 95:5, 1 mL/min,  $\lambda$  = 300 nm,  $t_R$  = 33.180 min and  $t_R$  = 52.690 min].

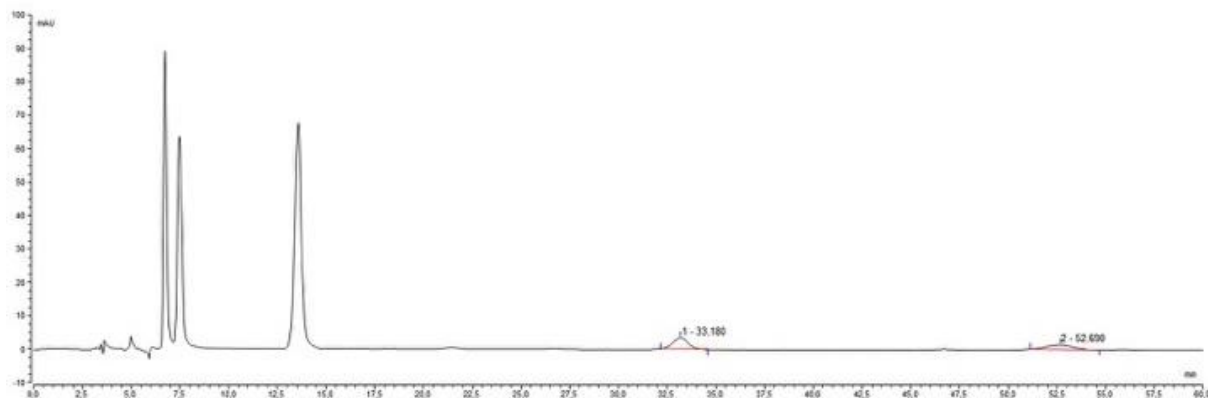

| Peak Name | Retention Time<br>min | Rel.Area<br>% |
|-----------|-----------------------|---------------|
| 1         | 33,18                 | 59,64         |
| 2         | 52,69                 | 40,36         |

#### d. HPLC chromatograms of compound (18d)

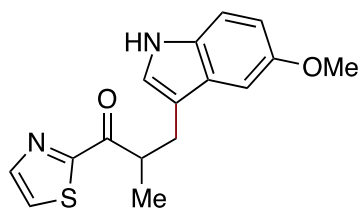

**Racemic** [Chiralpak IA column, 100 bar, T = 20 °C, *n*-Heptane (+ 0.1% diethylamine)/EtOH (+ 0.1% diethylamine) = 95:5, 1 mL/min,  $\lambda$  = 300 nm,  $t_R$  = 24.167 min and  $t_R$  = 28.463 min].

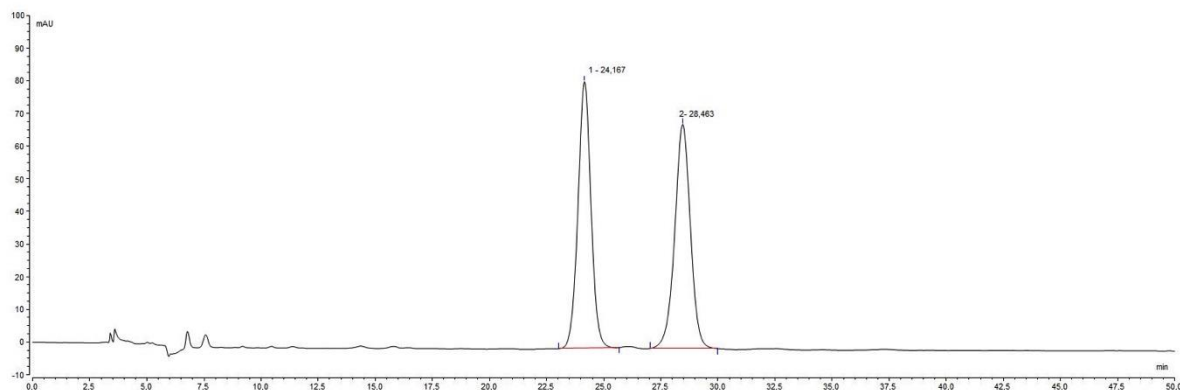

| Peak Name | Retention Time<br>min | Rel.Area<br>% |
|-----------|-----------------------|---------------|
| 1         | 24,167                | 49,67         |
| 2         | 28,463                | 50,33         |

**Indole** [Chiralpak IA column, 100 bar, T = 20 °C, *n*-Heptane (+ 0.1% diethylamine)/EtOH (+ 0.1% diethylamine) = 95:5, 1 mL/min,  $\lambda$  = 300 nm,  $t_R$  = 14.733 min].

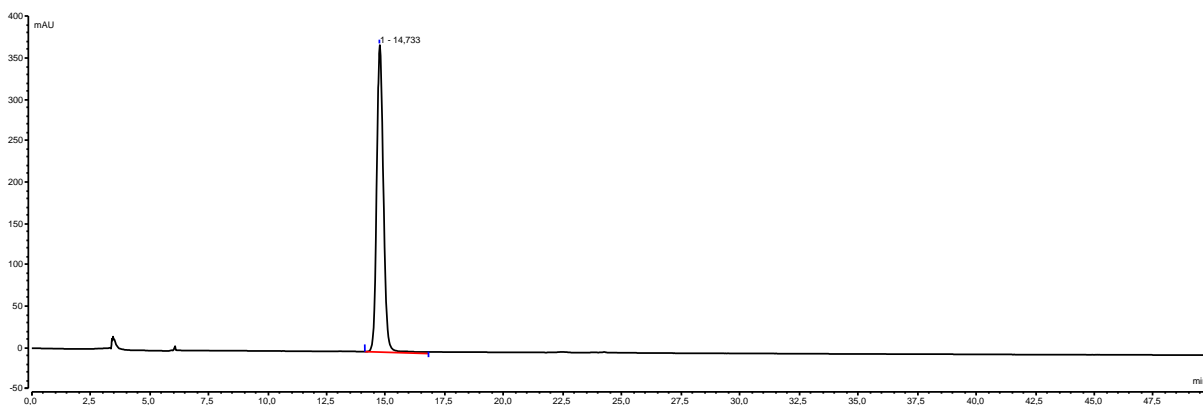

| Peak Name | Retention Time<br>min | Rel.Area<br>% |
|-----------|-----------------------|---------------|
| 1         | 14,733                | 100           |

**Following the general procedure A.** HPLC analysis of the crude residue indicated a ratio indole/**18d** of 17:83 and an enantiomeric excess of (+) 43 [Chiralpak IA column, 100 bar, T = 20 °C, *n*-Heptane (+ 0.1% diethylamine)/EtOH (+ 0.1% diethylamine) = 95:5, 1 mL/min,  $\lambda$  = 300 nm,  $t_R$  = 24.100 min and  $t_R$  = 28.380 min].

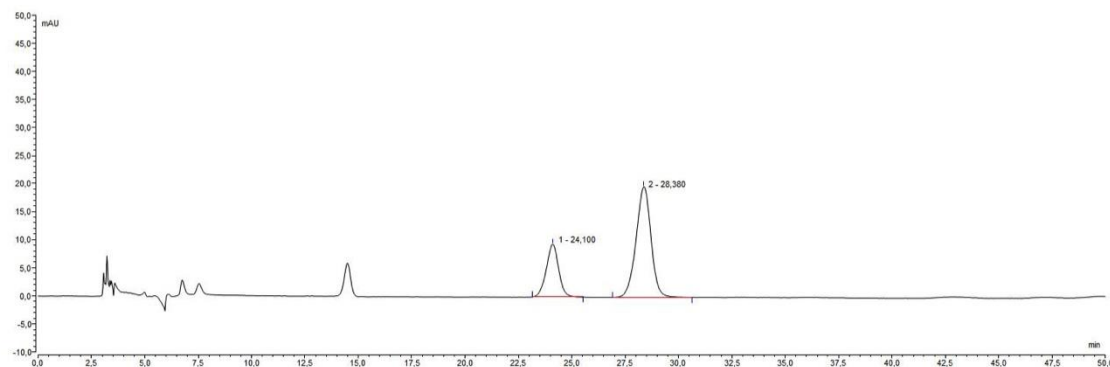

| Peak Name | Retention Time<br>min | Rel.Area<br>% |
|-----------|-----------------------|---------------|
| 1         | 24,1                  | 28,37         |
| 2         | 28,38                 | 71,63         |

**Following the general procedure B.** HPLC analysis of the crude residue indicated a ratio indole/**18d** of 1:99 and an enantiomeric excess of (+) 41 [Chiralpak IA column, 100 bar, T = 20 °C, *n*-Heptane (+ 0.1% diethylamine)/EtOH (+ 0.1% diethylamine) = 95:5, 1 mL/min,  $\lambda$  = 300 nm,  $t_R$  = 24.010 min and  $t_R$  = 28.230 min].

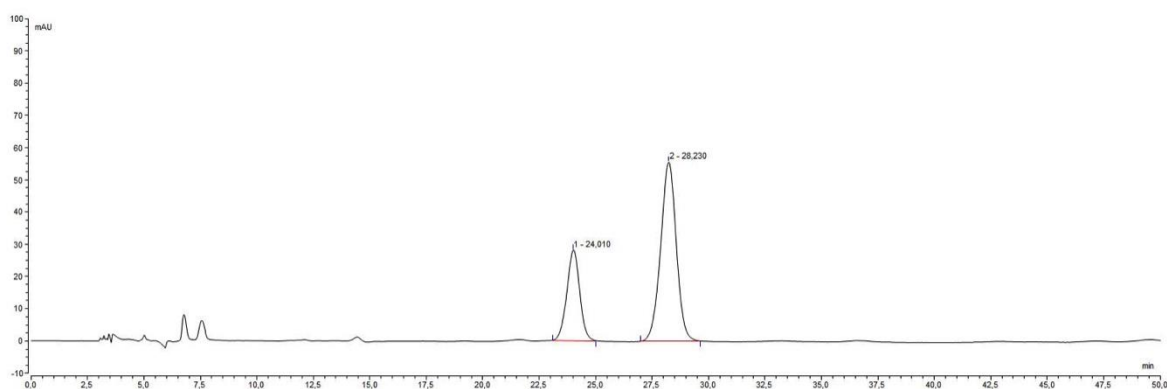

| Peak Name | Retention Time<br>min | Rel.Area<br>% |
|-----------|-----------------------|---------------|
| 1         | 24,01                 | 29,27         |
| 2         | 28,23                 | 70,73         |

**Following the general procedure C.** HPLC analysis of the crude residue indicated a ratio indole/**18d** of 22:78 and an enantiomeric excess of (-) **6** [Chiralpak IA column, 100 bar, T = 20 °C, *n*-Heptane (+ 0.1% diethylamine)/EtOH (+ 0.1% diethylamine) = 95:5, 1 mL/min,  $\lambda$  = 300 nm,  $t_R$  = 24.010 min and  $t_R$  = 28.257 min].

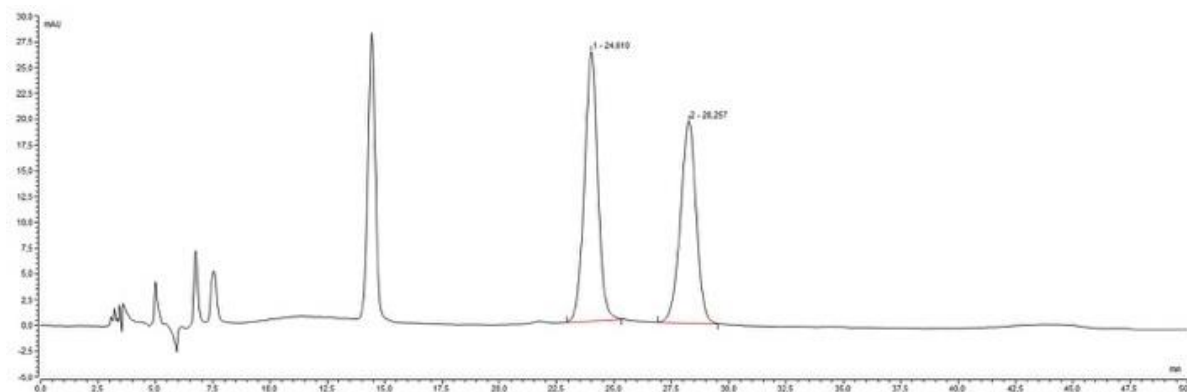

| Peak Name | Retention Time<br>min | Rel.Area<br>% |
|-----------|-----------------------|---------------|
| 1         | 24,01                 | 53,17         |
| 2         | 28,257                | 46,83         |

**Following the general procedure D.** HPLC analysis of the crude residue indicated a ratio indole/**18d** of 15:85 and an enantiomeric excess of (-) **74** [Chiralpak IA column, 100 bar, T = 20 °C, *n*-Heptane (+ 0.1% diethylamine)/EtOH (+ 0.1% diethylamine) = 95:5, 1 mL/min,  $\lambda$  = 300 nm,  $t_R$  = 23.990 min and  $t_R$  = 28.273 min].

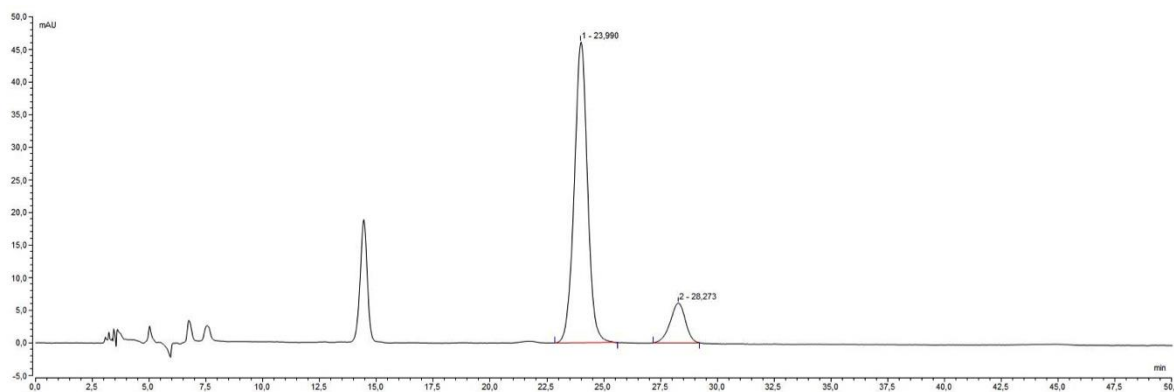

| Peak Name | Retention Time<br>min | Rel.Area<br>% |
|-----------|-----------------------|---------------|
| 1         | 23,99                 | 86,89         |
| 2         | 28,273                | 13,11         |

**Following the general procedure E.** HPLC analysis of the crude residue indicated a ratio indole/**18d** of 35:65 and an enantiomeric excess of 0 [Chiralpak IA column, 100 bar, T = 20 °C, *n*-Heptane (+ 0.1% diethylamine)/EtOH (+ 0.1% diethylamine) = 95:5, 1 mL/min,  $\lambda$  = 300 nm,  $t_R$  = 24.003 min and  $t_R$  = 28.263 min].

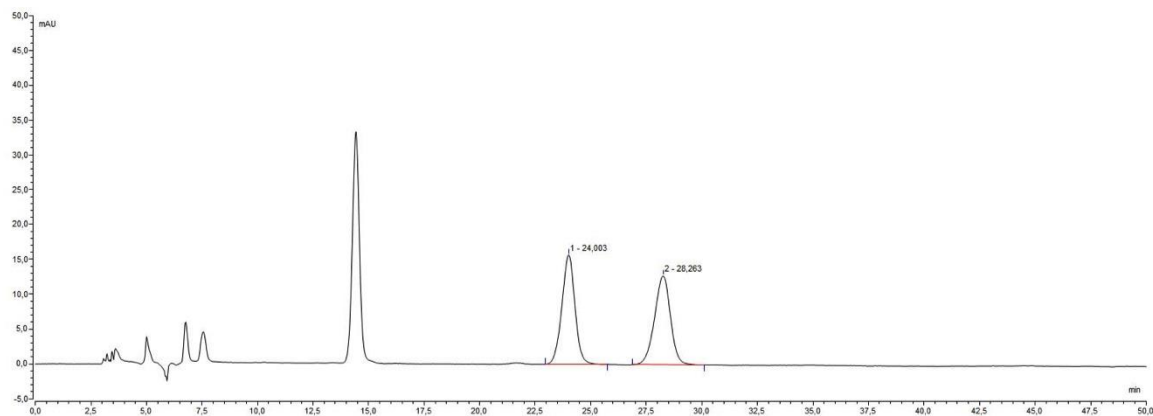

| Peak Name | Retention Time | Rel.Area |
|-----------|----------------|----------|
|           | min            | %        |
| 1         | 24,003         | 50,27    |
| 2         | 28,263         | 49,73    |

e. HPLC chromatograms of compound (18e)



**Racemic** [Chiralpak IA column, 250 bar, T = 30 °C, *n*-Hexane/*i*-PrOH = 98:2, 1 mL/min,  $\lambda$  = 280 nm,  $t_R$  = 56.977 min and  $t_R$  = 66.383 min].

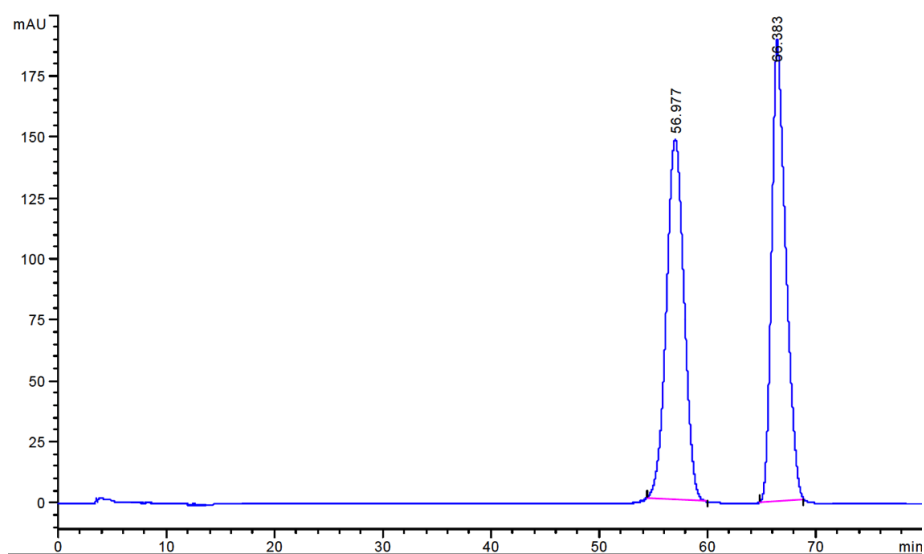

| Peak# | RetentionTime<br>min | Rel.Area<br>% |
|-------|----------------------|---------------|
| 1     | 56.977               | 49.5647       |
| 2     | 66.383               | 50.4353       |

**Indole** [Chiralpak IA column, 250 bar, T = 30 °C, *n*-Hexane/*i*-PrOH = 98:2, 1 mL/min,  $\lambda$  = 280 nm,  $t_R$  = 12.066 min].

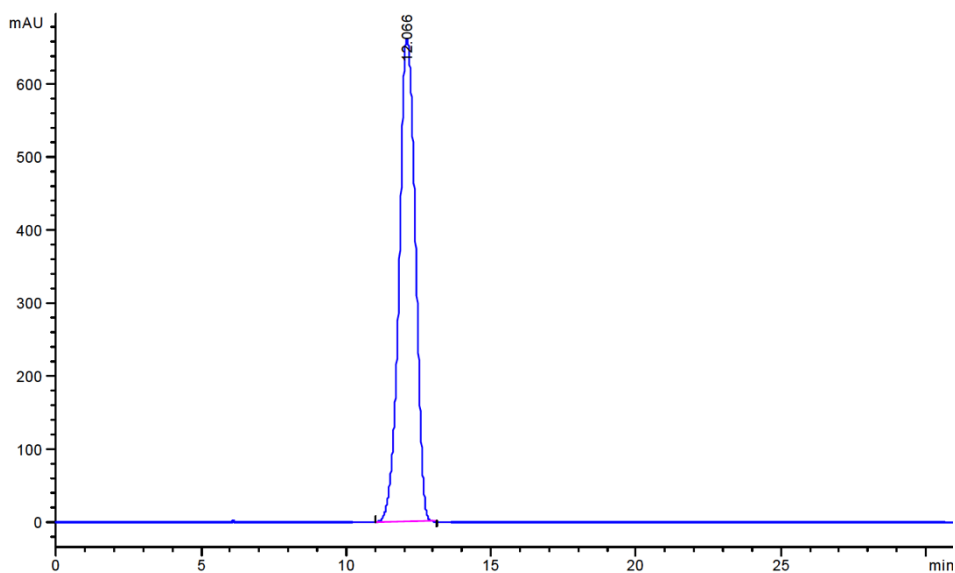

**Following the general procedure A.** HPLC analysis of the crude residue indicated a ratio indole/**18e** of 8:92 and an enantiomeric excess of (+) **11** [Chiralpak IA column, 250 bar, T = 30 °C, *n*-Hexane/*i*-PrOH = 98:2, 1 mL/min,  $\lambda$  = 280 nm,  $t_R$  = 54.394 min and  $t_R$  = 61.506 min].

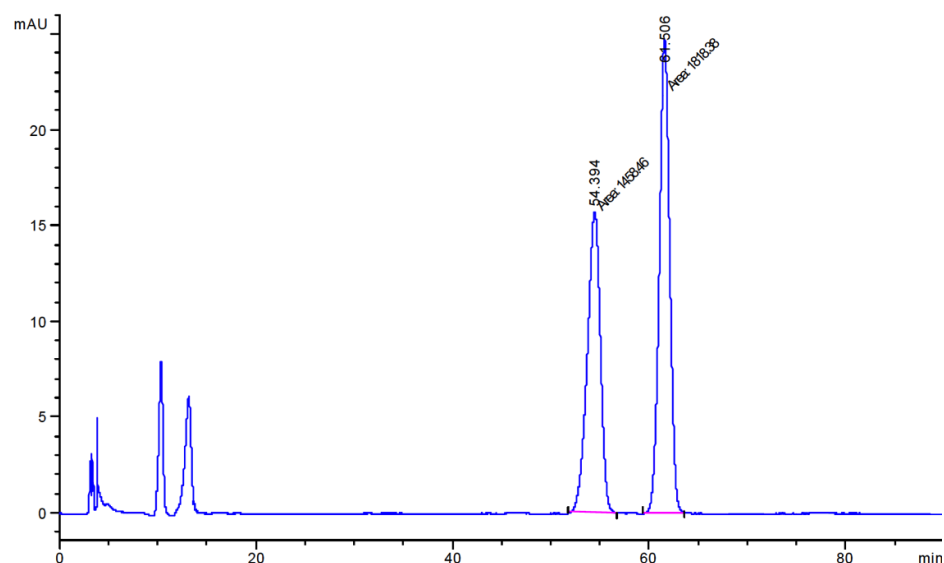

| Peak# | RetentionTime<br>min | Rel.Area<br>% |
|-------|----------------------|---------------|
| 1     | 54.394               | 44.5081       |
| 2     | 61.506               | 55.4919       |

**Following the general procedure B.** HPLC analysis of the crude residue indicated a ratio indole/**18e** of 8:92 and an enantiomeric excess of (+) **37** [Chiralpak IA column, 250 bar, T = 30 °C, *n*-Hexane/*i*-PrOH = 98:2, 1 mL/min,  $\lambda$  = 280 nm,  $t_R$  = 54.443 min and  $t_R$  = 61.179 min].

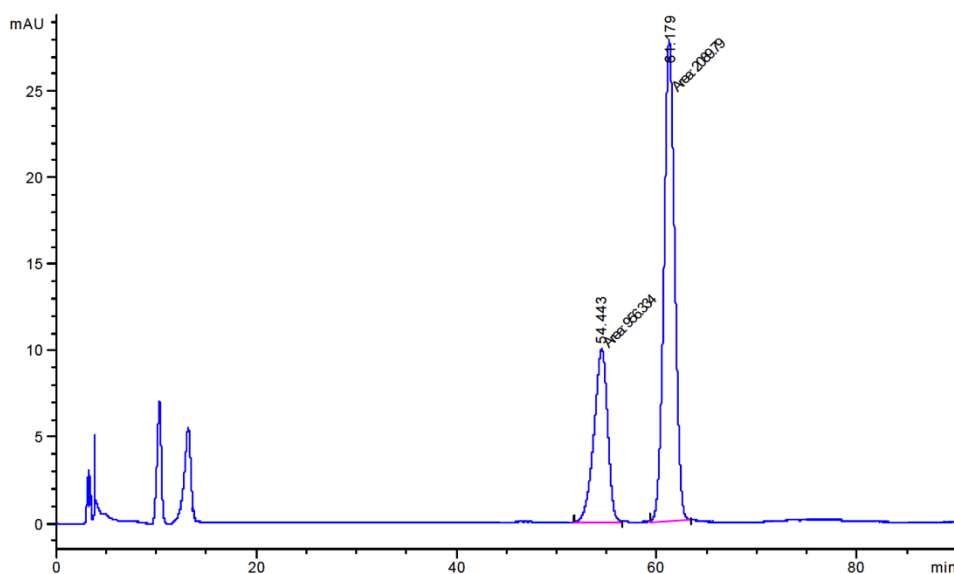

| Peak# | RetentionTime<br>min | Rel.Area<br>% |
|-------|----------------------|---------------|
| 1     | 54.443               | 31.3951       |
| 2     | 61.179               | 68.6049       |



**Following the general procedure C.** HPLC analysis of the crude residue indicated a ratio indole/**18e** of 75:25 and an enantiomeric excess of (-) **14** [Chiralpak IA column, 250 bar, T = 30 °C, *n*-Hexane/*i*-PrOH = 98:2, 1 mL/min,  $\lambda$  = 280 nm,  $t_R$  = 58.679 min and  $t_R$  = 68.316 min].

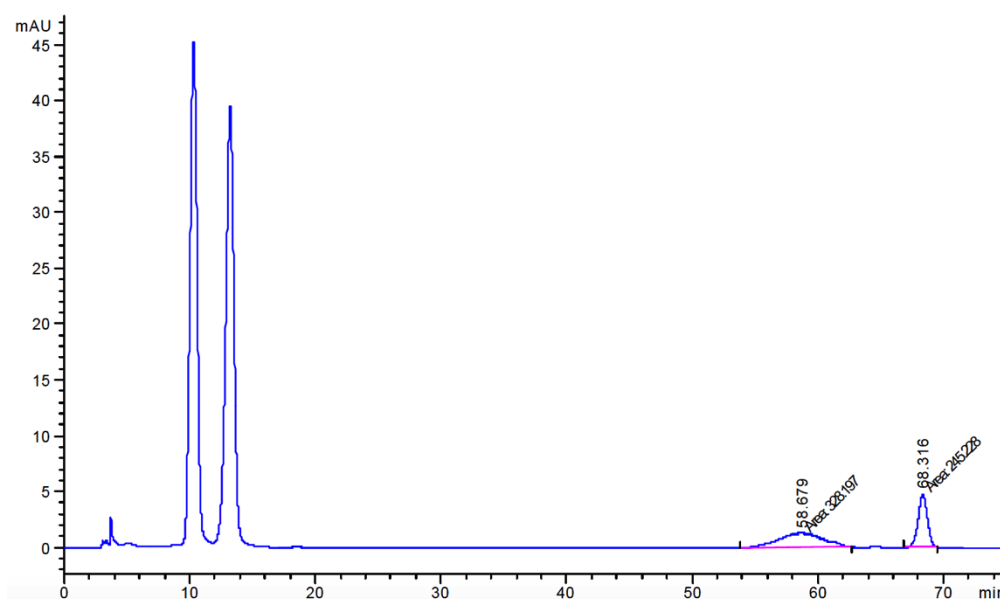

| Peak# | RetentionTime<br>min | Rel.Area<br>% |
|-------|----------------------|---------------|
| 1     | 58.679               | 57.2345       |
| 2     | 68.316               | 42.7655       |

**Following the general procedure D.** HPLC analysis of the crude residue indicated a ratio indole/**18e** of 12:88 and an enantiomeric excess of (-) **82** [Chiralpak IA column, 250 bar, T = 30 °C, *n*-Hexane/*i*-PrOH = 98:2, 1 mL/min,  $\lambda$  = 280 nm,  $t_R$  = 54.533 min and  $t_R$  = 61.299 min].

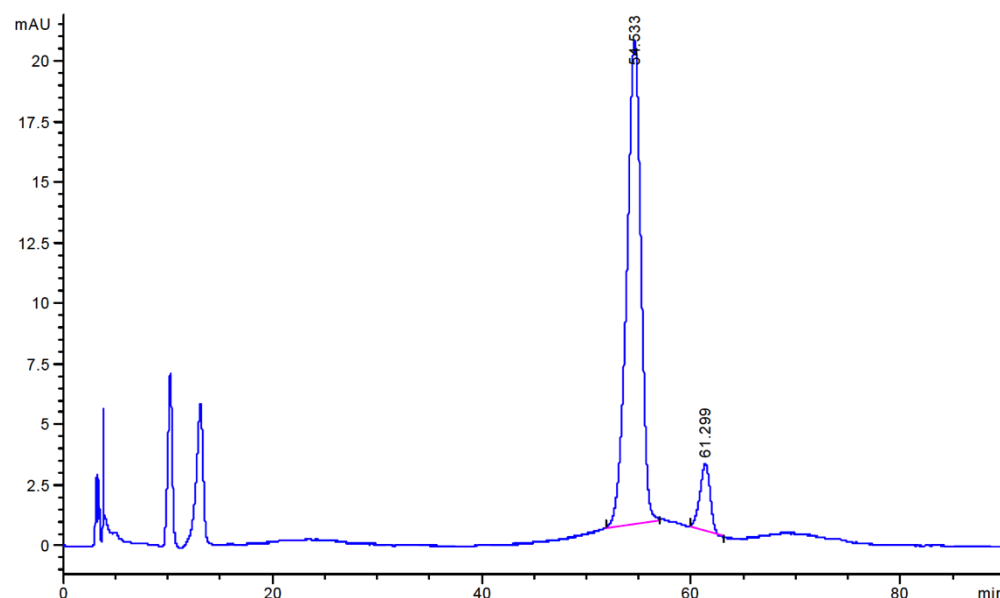

| Peak# | RetentionTime<br>min | Rel.Area<br>% |
|-------|----------------------|---------------|
| 1     | 54.533               | 90.8116       |
| 2     | 61.299               | 9.1884        |

**Following the general procedure E.** HPLC analysis of the crude residue indicated a ratio indole/**18e** of 74:26 and an enantiomeric excess of (+) 8 [Chiralpak IA column, 250 bar, T = 30 °C, *n*-Hexane/*i*-PrOH = 98:2, 1 mL/min,  $\lambda$  = 280 nm,  $t_R$  = 56.049 min and  $t_R$  = 68.013 min].

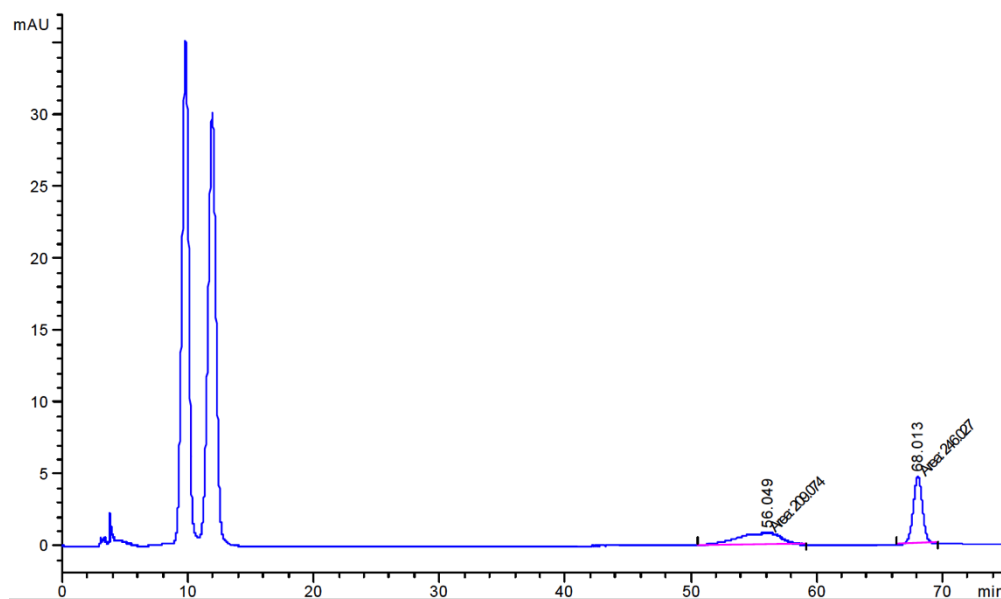

| Peak# | RetentionTime | Rel.Area |
|-------|---------------|----------|
|       | min           | %        |
| 1     | 56.049        | 45.9401  |
| 2     | 68.013        | 54.0599  |

**f. HPLC chromatograms of compound (18f)**

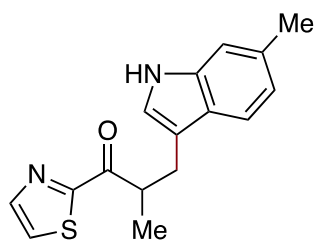

**Racemic** [Chiralpak IB column, 250 bar, T = 30 °C, *n*-Hexane/*i*-PrOH = 92:8, 1 mL/min,  $\lambda$  = 300 nm,  $t_R$  = 15.375 min and  $t_R$  = 19.436 min].

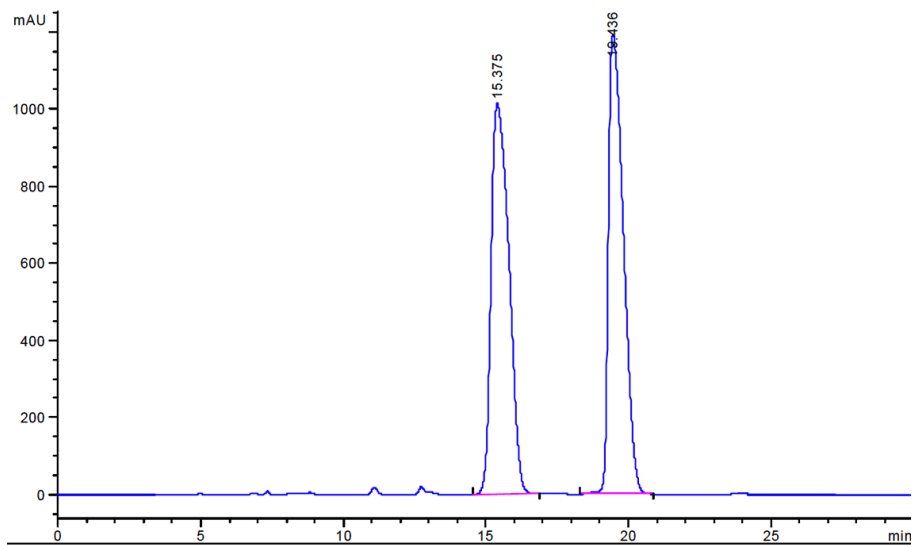

| Peak# | RetentionTime | Rel.Area |
|-------|---------------|----------|
|       | min           | %        |
| 1     | 15.375        | 50.1345  |
| 2     | 19.436        | 49.8655  |

**Indole** [Chiralpak IB column, 250 bar, T = 30 °C, *n*-Hexane/*i*-PrOH = 92:8, 1 mL/min,  $\lambda$  = 300 nm,  $t_R$  = 8.736 min].

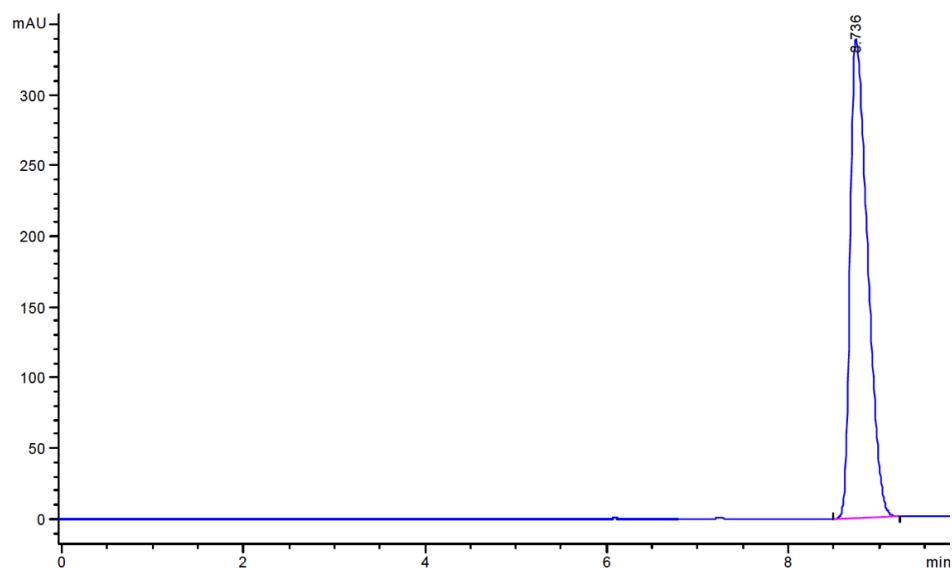

**Following the general procedure A.** HPLC analysis of the crude residue indicated a ratio indole/**18f** of 5:95 and an enantiomeric excess of (+) **36** [Chiralpak IB column, 250 bar, T = 30 °C, *n*-Hexane/*i*-PrOH = 92:8, 1 mL/min,  $\lambda$  = 300 nm,  $t_R$  = 15.744 min and  $t_R$  = 19.592 min].

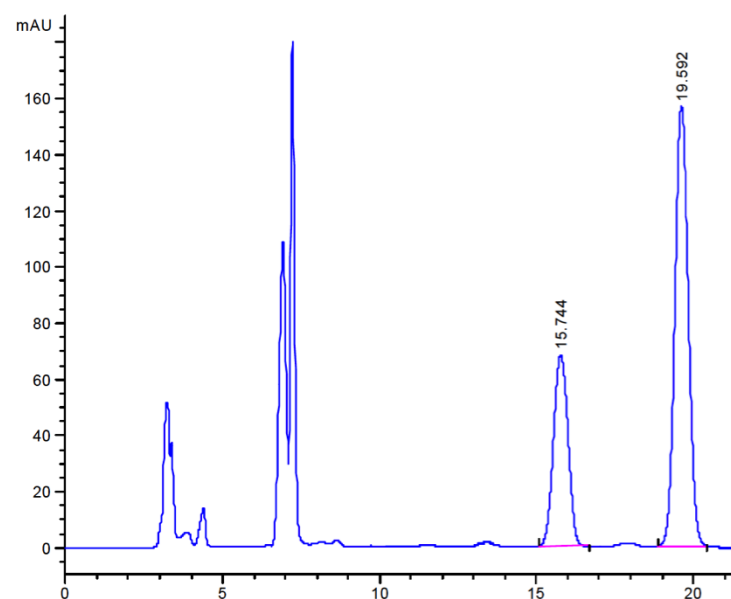

| Peak# | RetentionTime<br>min | Rel.Area<br>% |
|-------|----------------------|---------------|
| 1     | 15.744               | 31.951        |
| 2     | 19.592               | 68.049        |

**Following the general procedure B.** HPLC analysis of the crude residue indicated a ratio indole/**18f** of 1:99 and an enantiomeric excess of (+) **36** [Chiralpak IB column, 250 bar, T = 30 °C, *n*-Hexane/*i*-PrOH = 92:8, 1 mL/min,  $\lambda$  = 300 nm,  $t_R$  = 15.582 min and  $t_R$  = 19.088 min].

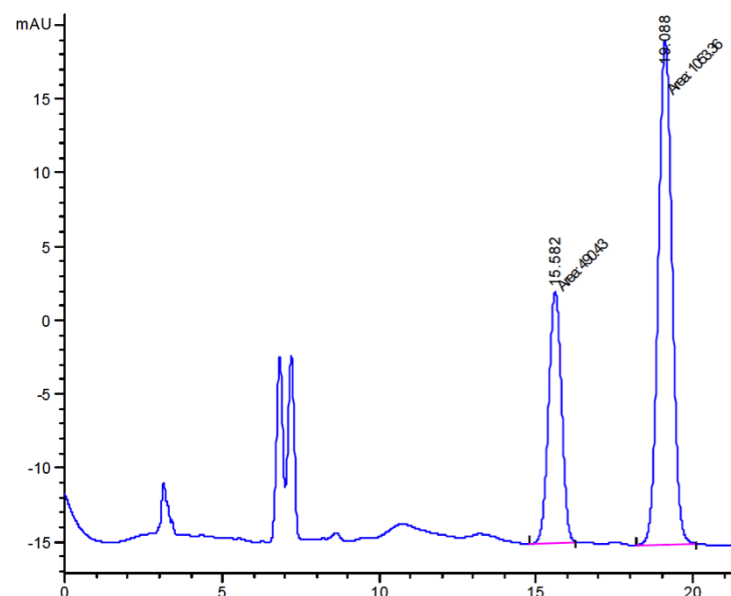

| Peak# | RetentionTime<br>min | Rel.Area<br>% |
|-------|----------------------|---------------|
| 1     | 15.582               | 31.7679       |
| 2     | 19.088               | 68.2321       |

**Following the general procedure C.** HPLC analysis of the crude residue indicated a ratio indole/**18f** of 56:44 and an enantiomeric excess of (-) 14 [Chiralpak IB column, 250 bar, T = 30 °C, *n*-Hexane/*i*-PrOH = 92:8, 1 mL/min,  $\lambda$  = 300 nm,  $t_R$  = 15.703 min and  $t_R$  = 19.736 min].

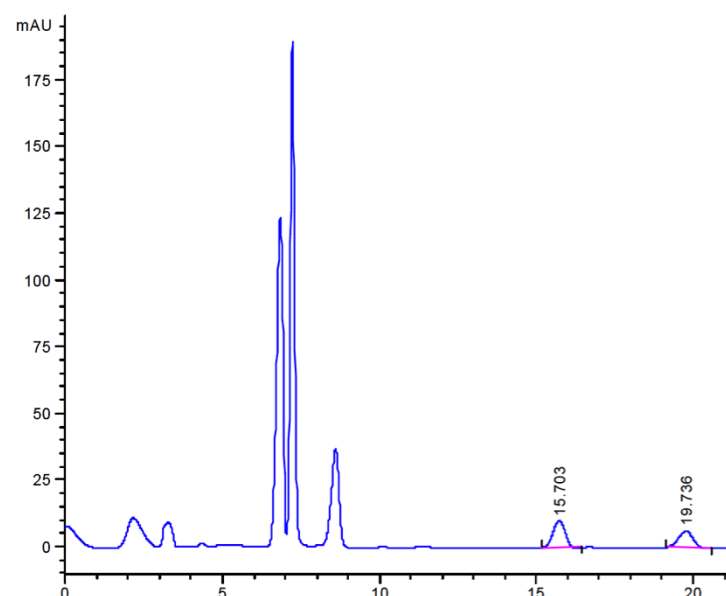

| Peak# | RetentionTime<br>min | Rel.Area<br>% |
|-------|----------------------|---------------|
| 1     | 15.703               | 57.0111       |
| 2     | 19.736               | 42.9889       |

**Following the general procedure D.** HPLC analysis of the crude residue indicated a ratio indole/**18f** of 1:99 and an enantiomeric excess of (-) 73 [Chiralpak IB column, 250 bar, T = 30 °C, *n*-Hexane/*i*-PrOH = 92:8, 1 mL/min,  $\lambda$  = 300 nm,  $t_R$  = 15.708 min and  $t_R$  = 19.308 min].

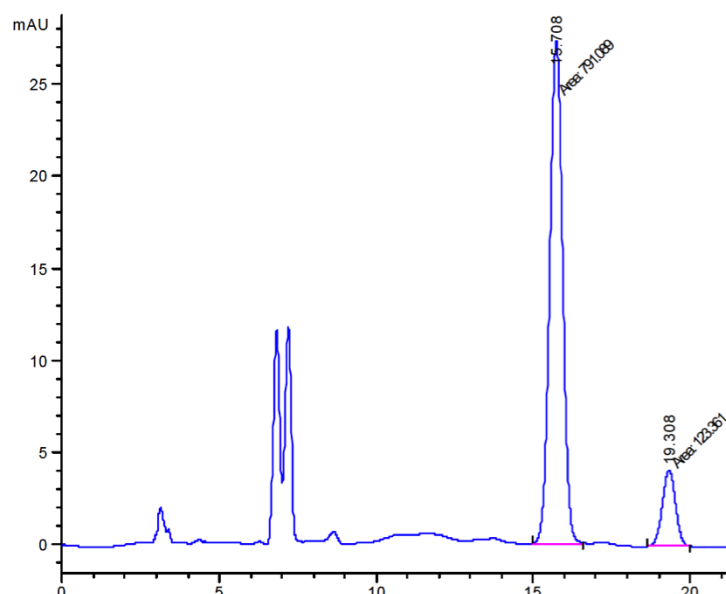

| Peak# | RetentionTime<br>min | Rel.Area<br>% |
|-------|----------------------|---------------|
| 1     | 15.708               | 86.5098       |
| 2     | 19.308               | 13.4902       |

**Following the general procedure E.** HPLC analysis of the crude residue indicated a ratio indole/**18f** of 58:42 and an enantiomeric excess of (+) 13 [Chiralpak IB column, 250 bar, T = 30 °C, *n*-Hexane/*i*-PrOH = 92:8, 1 mL/min,  $\lambda$  = 300 nm,  $t_R$  = 15.879 min and  $t_R$  = 19.941 min].

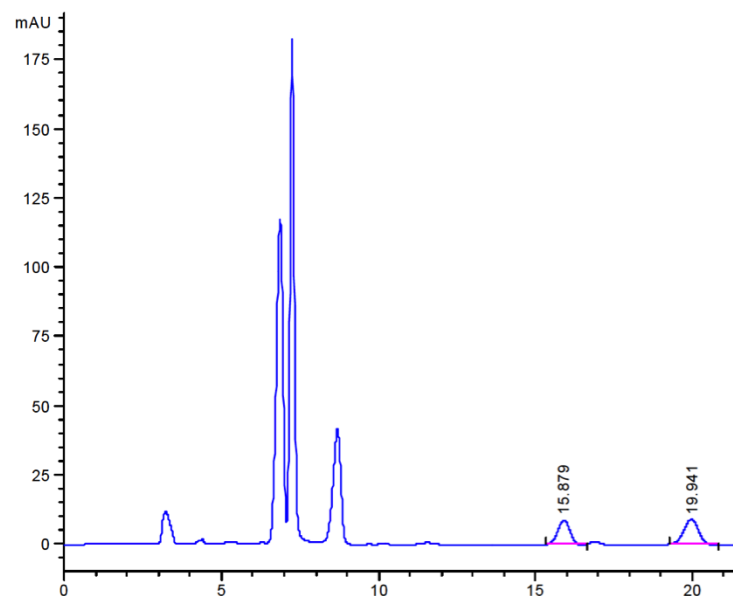

| Peak# | RetentionTime<br>min | Rel. Area<br>% |
|-------|----------------------|----------------|
| 1     | 15.879               | 43.4994        |
| 2     | 19.941               | 56.5006        |

**g. HPLC chromatograms of compound (18g)**

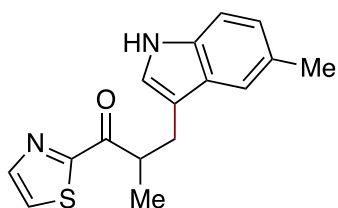

**Racemic** [Chiralpak IA column, 250 bar, T = 30 °C, *n*-Hexane/*i*-PrOH = 97:3,1 mL/min,  $\lambda$  = 280 nm,  $t_R$  = 34.221 min and  $t_R$  = 44.000 min].

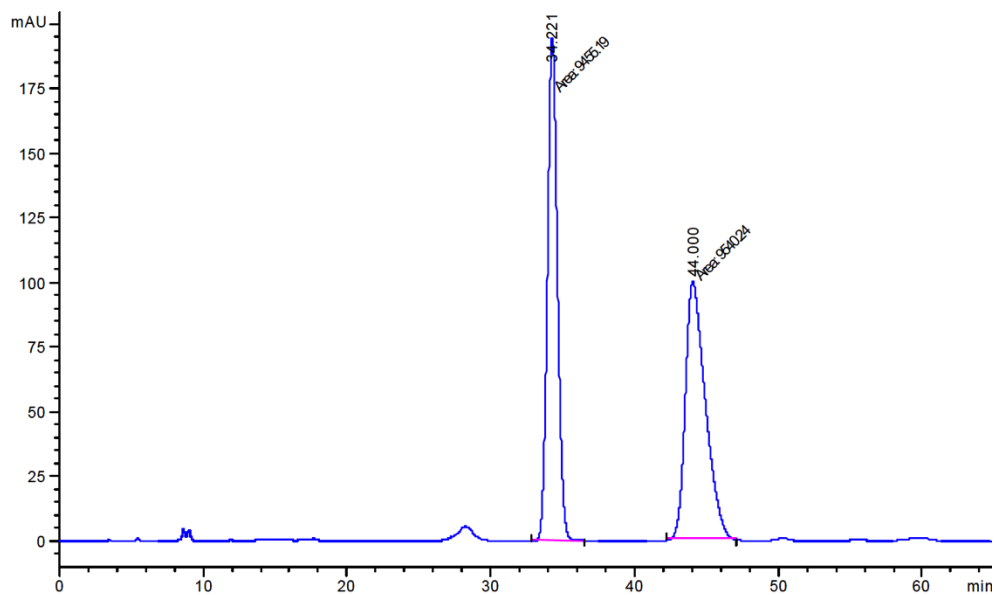

| Peak# | RetentionTime<br>min | Rel.Area<br>% |
|-------|----------------------|---------------|
| 1     | 34.221               | 49.7761       |
| 2     | 44                   | 50.2239       |

**Indole** [Chiralpak IA column, 250 bar, T = 30 °C, *n*-Hexane/*i*-PrOH = 97:3,1 mL/min,  $\lambda$  = 280 nm,  $t_R$  = 12.395 min].

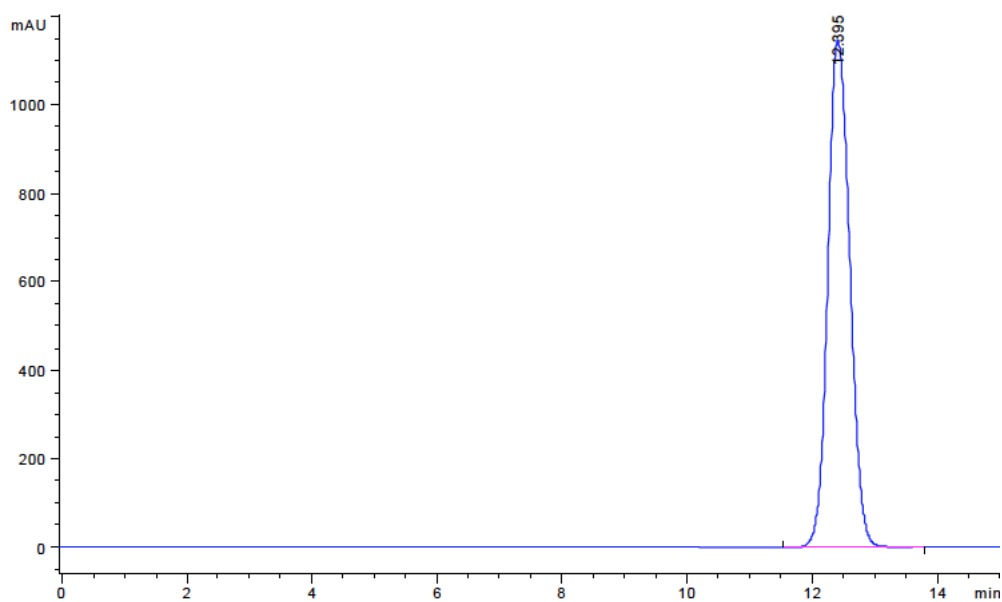

**Following the general procedure A.** HPLC analysis of the crude residue indicated a ratio indole/**18g** of 1:99 and an enantiomeric excess of (+) **43** [Chiralpak IA column, 250 bar, T = 30 °C, *n*-Hexane/*i*-PrOH = 97:3,1 mL/min,  $\lambda$  = 280 nm,  $t_R$  = 38.225 min and  $t_R$  = 43.982 min].

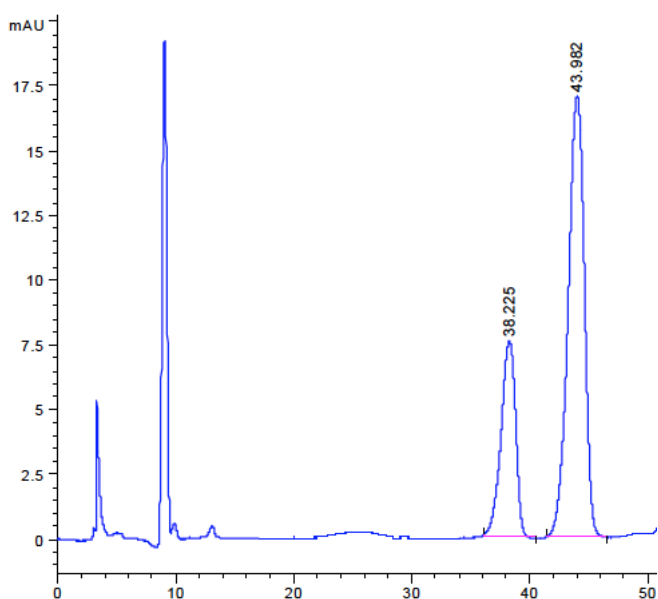

| Peak# | RetentionTime<br>min | Rel.Area<br>% |
|-------|----------------------|---------------|
| 1     | 38.225               | 28.6195       |
| 2     | 43.982               | 71.3805       |

**Following the general procedure B.** HPLC analysis of the crude residue indicated a ratio indole/**18g** of 10:90 and an enantiomeric excess of (+) **43** [Chiralpak IA column, 250 bar, T = 30 °C, *n*-Hexane/*i*-PrOH = 97:3,1 mL/min,  $\lambda$  = 280 nm,  $t_R$  = 34.838 min and  $t_R$  = 46.129 min].

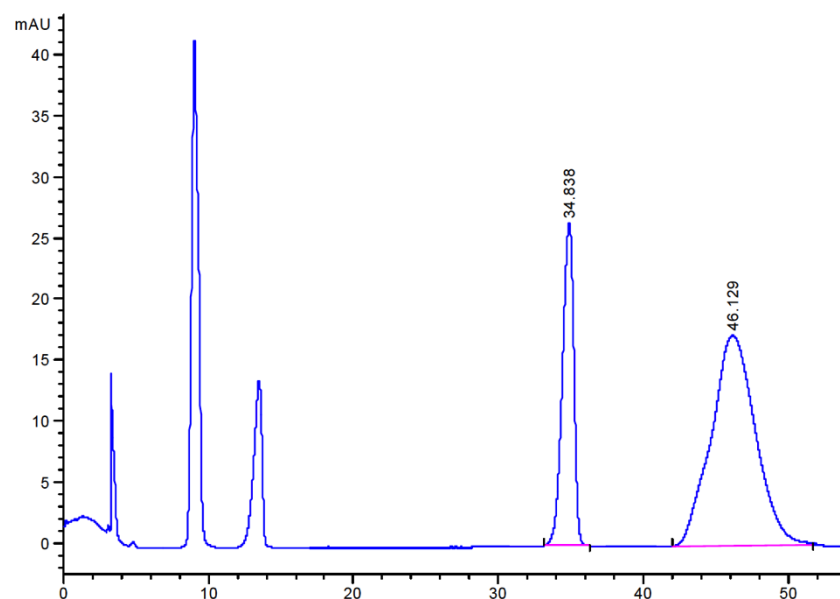

| Peak# | RetentionTime<br>min | Rel.Area<br>% |
|-------|----------------------|---------------|
| 1     | 34.838               | 28.3881       |
| 2     | 46.129               | 71.6119       |



**Following the general procedure C.** HPLC analysis of the crude residue indicated a ratio indole/**18g** of 54:46 and an enantiomeric excess of (-) 4 [Chiralpak IA column, 250 bar, T = 30 °C, *n*-Hexane/*i*-PrOH = 97:3,1 mL/min,  $\lambda$  = 280 nm,  $t_R$  = 36.447 min and  $t_R$  = 41.916 min].

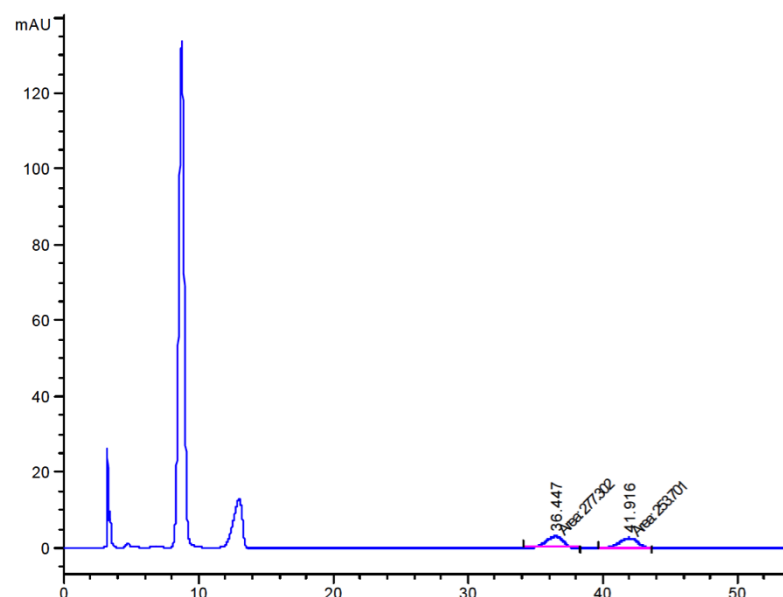

| Peak# | RetentionTime<br>min | Rel.Area<br>% |
|-------|----------------------|---------------|
| 1     | 36.447               | 52.2224       |
| 2     | 41.916               | 47.7776       |

**Following the general procedure D.** HPLC analysis of the crude residue indicated a ratio indole/**18g** of 19:81 and an enantiomeric excess of (-) 67 [Chiralpak IA column, 250 bar, T = 30 °C, *n*-Hexane/*i*-PrOH = 97:3,1 mL/min,  $\lambda$  = 280 nm,  $t_R$  = 34.297 min and  $t_R$  = 46.508 min].

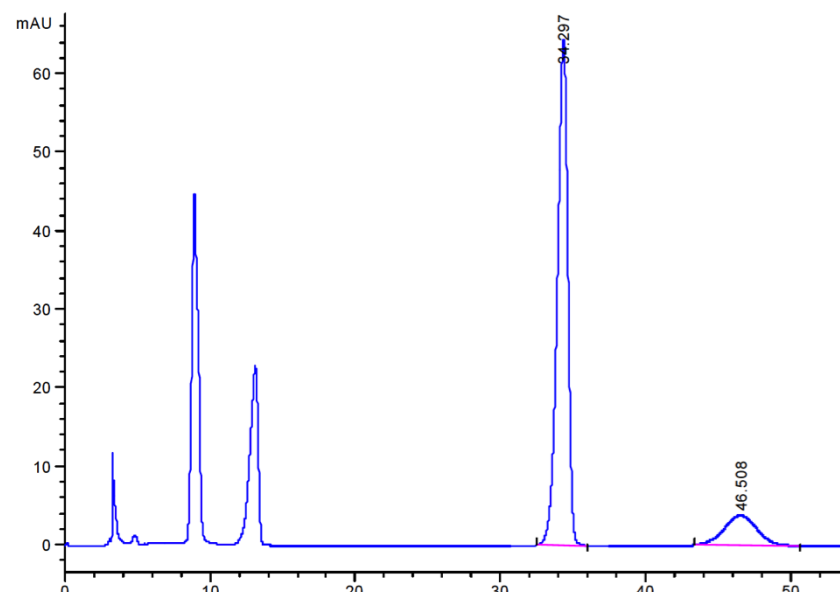

| Peak# | RetentionTime<br>min | Rel.Area<br>% |
|-------|----------------------|---------------|
| 1     | 34.297               | 83.7295       |
| 2     | 46.508               | 16.2705       |

**Following the general procedure E.** HPLC analysis of the crude residue indicated a ratio indole/**18g** of 50:50 and an enantiomeric excess of (+) 20 [Chiralpak IA column, 250 bar, T = 30 °C, *n*-Hexane/*i*-PrOH = 97:3,1 mL/min,  $\lambda$  = 280 nm,  $t_R$  = 37.651 min and  $t_R$  = 43.591 min].

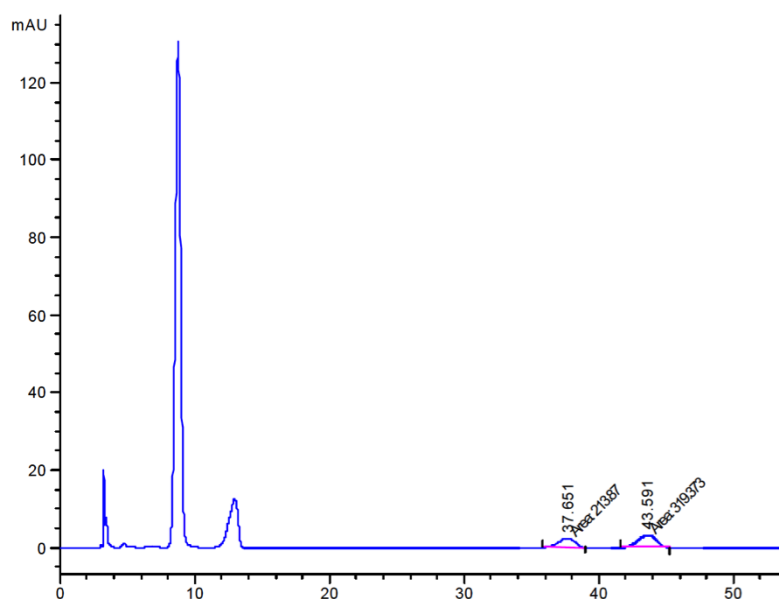

| Peak# | RetentionTime<br>min | Rel.Area<br>% |
|-------|----------------------|---------------|
| 1     | 37.651               | 40.1075       |
| 2     | 43.591               | 59.8925       |

### h. HPLC chromatograms of compound (18h)

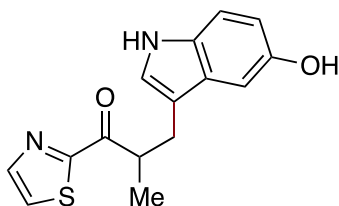

**Racemic** [Chiralpak IA column, 100 bar, T = 25 °C, *n*-Heptane (+ 0.1% diethylamine)/EtOH (+ 0.1% diethylamine) = 90:10, 1 mL/min,  $\lambda$  = 300 nm,  $t_R$  = 29.340 min and  $t_R$  = 34.167 min].

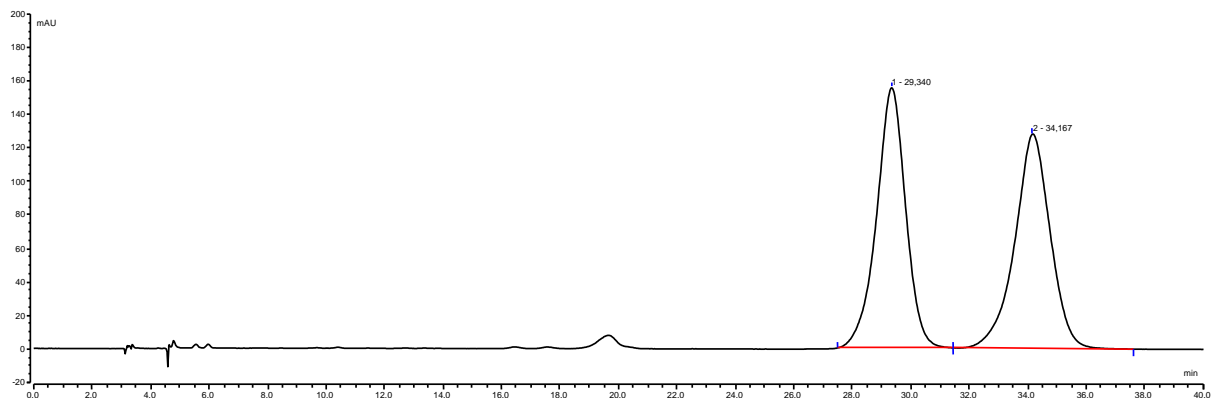

| Peak Name | Retention Time<br>min | Rel.Area<br>% |
|-----------|-----------------------|---------------|
| 1         | 29,34                 | 49,91         |
| 2         | 34,167                | 50,09         |

**Indole** [Chiralpak IA column, 100 bar, T = 25 °C, *n*-Heptane (+ 0.1% diethylamine)/EtOH (+ 0.1% diethylamine) = 90:10, 1 mL/min,  $\lambda$  = 300 nm,  $t_R$  = 19.767 min].

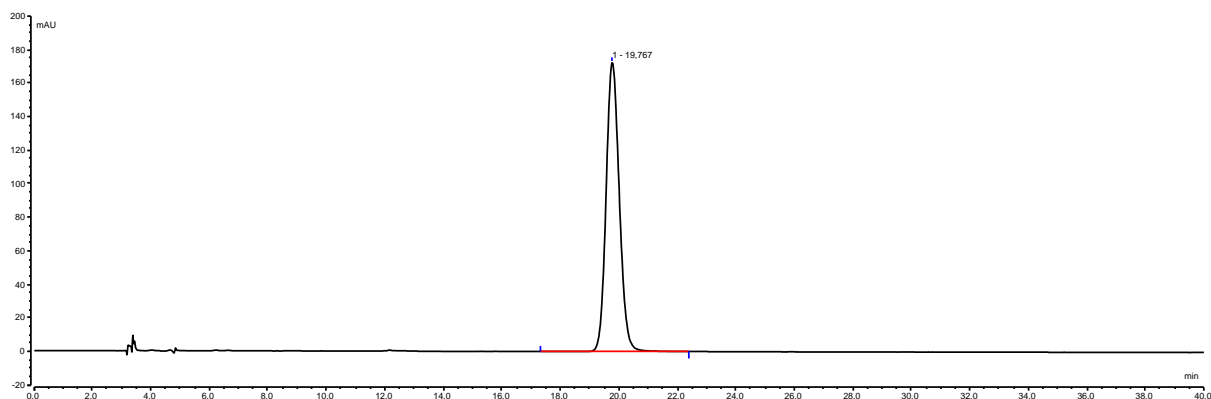

| Peak Name | Retention Time<br>min | Rel.Area<br>% |
|-----------|-----------------------|---------------|
| 1         | 19,767                | 100           |

**Following the general procedure A.** HPLC analysis of the crude residue indicated a ratio indole/**18h** of 17:83 and an enantiomeric excess of (+) **37** [Chiralpak IA column, 100 bar, T = 25 °C, *n*-Heptane (+ 0.1% diethylamine)/EtOH (+ 0.1% diethylamine) = 90:10, 1 mL/min,  $\lambda$  = 300 nm,  $t_R$  = 29.600 min and  $t_R$  = 34.463 min].

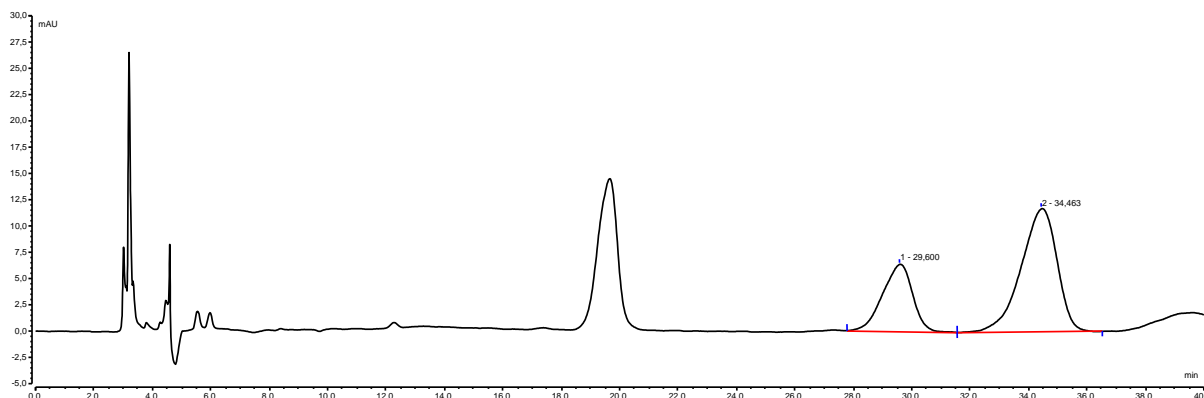

| Peak Name | Retention Time<br>min | Rel.Area<br>% |
|-----------|-----------------------|---------------|
| 1         | 29,6                  | 31,26         |
| 2         | 34,463                | 68,74         |

**Following the general procedure B.** HPLC analysis of the crude residue indicated a ratio indole/**18h** of > 1:99 and an enantiomeric excess of (+) **29** [Chiralpak IA column, 100 bar, T = 25 °C, *n*-Heptane (+ 0.1% diethylamine)/EtOH (+ 0.1% diethylamine) = 90:10, 1 mL/min,  $\lambda$  = 300 nm,  $t_R$  = 29.600 min and  $t_R$  = 34.460 min].

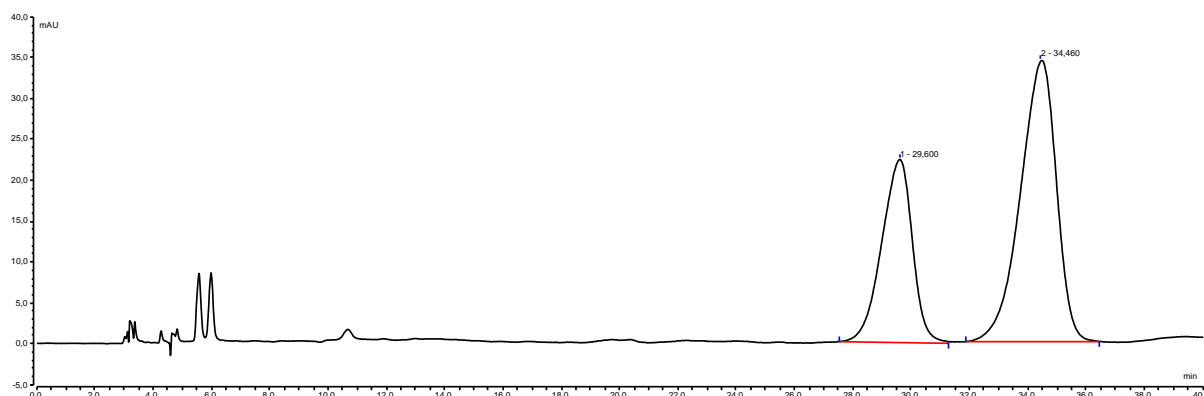

| Peak Name | Retention Time<br>min | Rel.Area<br>% |
|-----------|-----------------------|---------------|
| 1         | 29,6                  | 35,43         |
| 2         | 34,46                 | 64,57         |

**Following the general procedure C.** HPLC analysis of the crude residue indicated a ratio indole/**18h** of 29:71 and an enantiomeric excess of (-) 20 [Chiralpak IA column, 100 bar, T = 25 °C, *n*-Heptane (+ 0.1% diethylamine)/EtOH (+ 0.1% diethylamine) = 90:10, 1 mL/min,  $\lambda$  = 300 nm,  $t_R$  = 29.577 min and  $t_R$  = 34.457 min].

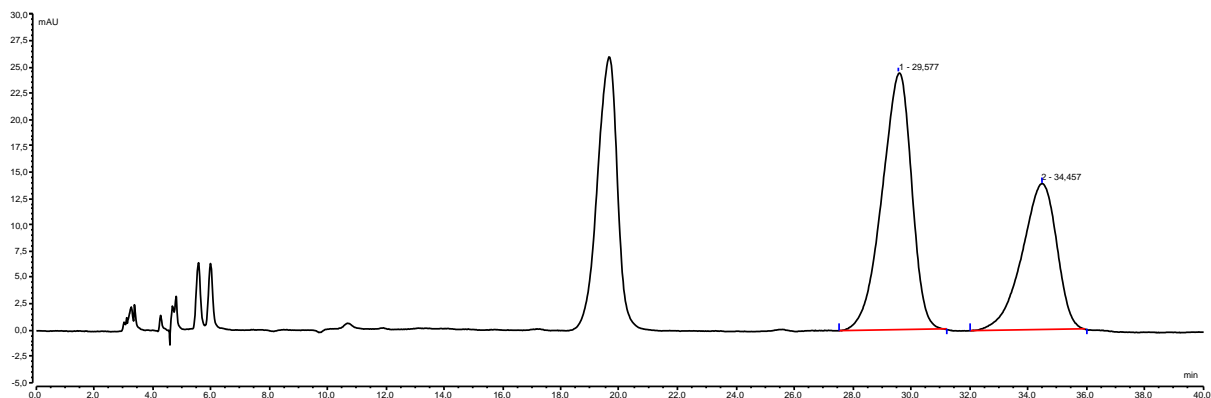

| Peak Name | Retention Time<br>min | Rel.Area<br>% |
|-----------|-----------------------|---------------|
| 1         | 29,577                | 59,99         |
| 2         | 34,457                | 40,01         |

**Following the general procedure D.** HPLC analysis of the crude residue indicated a ratio indole/**18h** of 12:88 and an enantiomeric excess of (-) 70 [Chiralpak IA column, 100 bar, T = 25 °C, *n*-Heptane (+ 0.1% diethylamine)/EtOH (+ 0.1% diethylamine) = 90:10, 1 mL/min,  $\lambda$  = 300 nm,  $t_R$  = 29.550 min and  $t_R$  = 34.473 min].

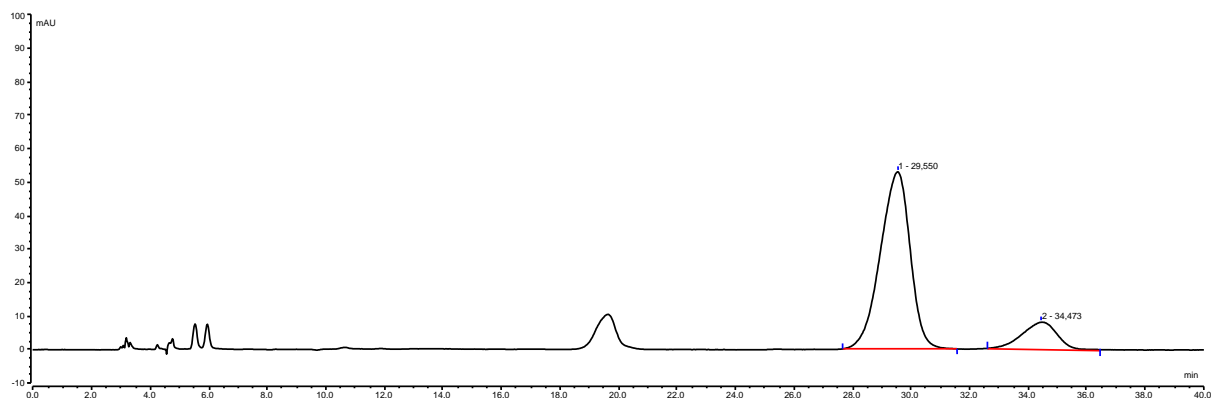

| Peak Name | Retention Time<br>min | Rel.Area<br>% |
|-----------|-----------------------|---------------|
| 1         | 29,55                 | 85,06         |
| 2         | 34,473                | 14,94         |

**Following the general procedure E.** HPLC analysis of the crude residue indicated a ratio indole/**18h** of 47:53 and an enantiomeric excess of (-) 15 [Chiralpak IA column, 100 bar, T = 25 °C, *n*-Heptane (+ 0.1% diethylamine)/EtOH (+ 0.1% diethylamine) = 90:10, 1 mL/min,  $\lambda$  = 300 nm,  $t_R$  = 29.583 min and  $t_R$  = 34.480 min].

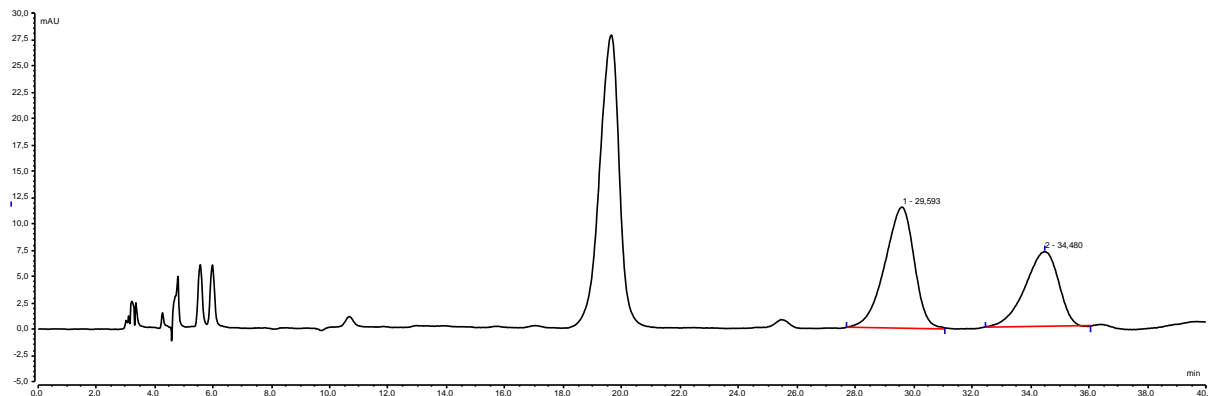

| Peak Name | Retention Time | Rel.Area |
|-----------|----------------|----------|
|           | min            | %        |
| 1         | 29,6           | 57,58    |
| 2         | 34,487         | 42,42    |



**Following the general procedure A.** HPLC analysis of the crude residue indicated a ratio indole/**18i** of 13:87 and an enantiomeric excess of (+) 27 [Chiralpak IA column, 250 bar, T = 30 °C, *n*-Hexane/*i*-PrOH = 97:3, 1 mL/min,  $\lambda$  = 280 nm,  $t_R$  = 47.126 min and  $t_R$  = 53.182 min].

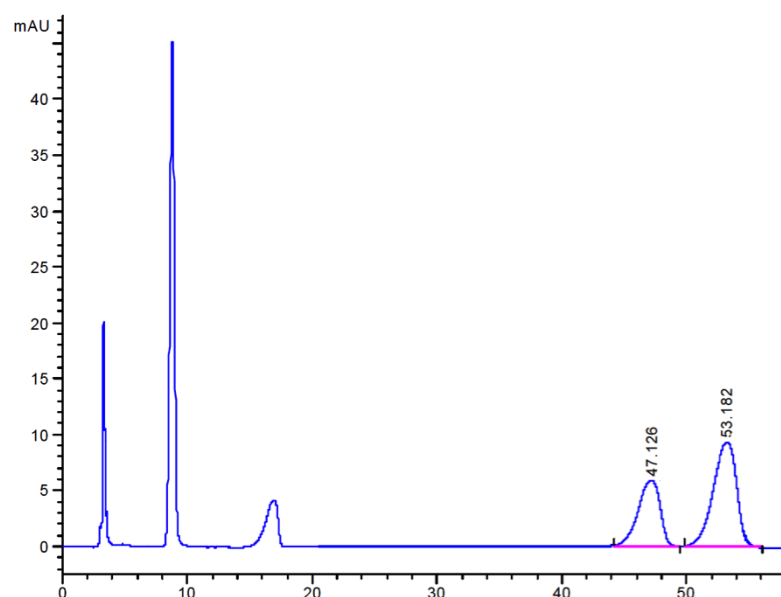

| Peak# | RetentionTime<br>min | Rel.Area<br>% |
|-------|----------------------|---------------|
| 1     | 47.126               | 36.6143       |
| 2     | 53.182               | 63.3857       |

**Following the general procedure B.** HPLC analysis of the crude residue indicated a ratio indole/**18i** of 32:68 and an enantiomeric excess of (+) 42 [Chiralpak IA column, 250 bar, T = 30 °C, *n*-Hexane/*i*-PrOH = 97:3, 1 mL/min,  $\lambda$  = 280 nm,  $t_R$  = 46.659 min and  $t_R$  = 52.234 min].

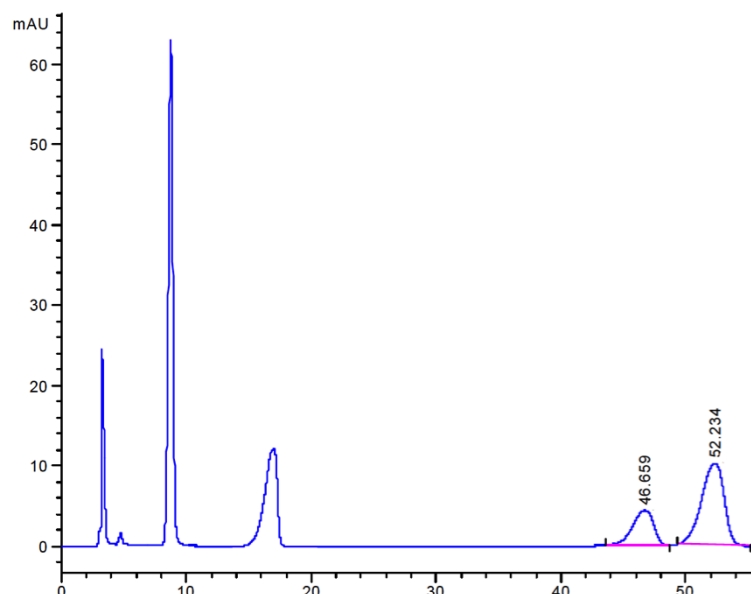

| Peak# | RetentionTime<br>min | Rel.Area<br>% |
|-------|----------------------|---------------|
| 1     | 46.659               | 29.0707       |
| 2     | 52.234               | 70.9293       |



**Following the general procedure C.** HPLC analysis of the crude residue indicated a ratio indole/**18i** of 85:15 and an enantiomeric excess of (-) 2 [Chiralpak IA column, 250 bar, T = 30 °C, *n*-Hexane/*i*-PrOH = 97:3, 1 mL/min,  $\lambda$  = 280 nm,  $t_R$  = 45.585 min and  $t_R$  = 51.319 min].

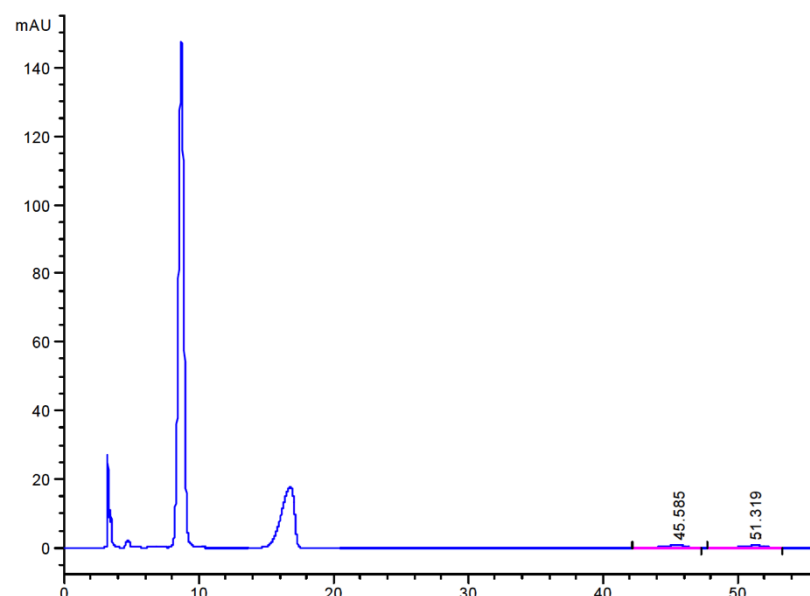

| Peak# | RetentionTime<br>min | Rel.Area<br>% |
|-------|----------------------|---------------|
| 1     | 45.585               | 51.2158       |
| 2     | 51.319               | 48.7842       |

**Following the general procedure D.** HPLC analysis of the crude residue indicated a ratio indole/**18i** of 61:39 and an enantiomeric excess of (-) 80 [Chiralpak IA column, 250 bar, T = 30 °C, *n*-Hexane/*i*-PrOH = 97:3, 1 mL/min,  $\lambda$  = 280 nm,  $t_R$  = 46.312 min and  $t_R$  = 51.965 min].

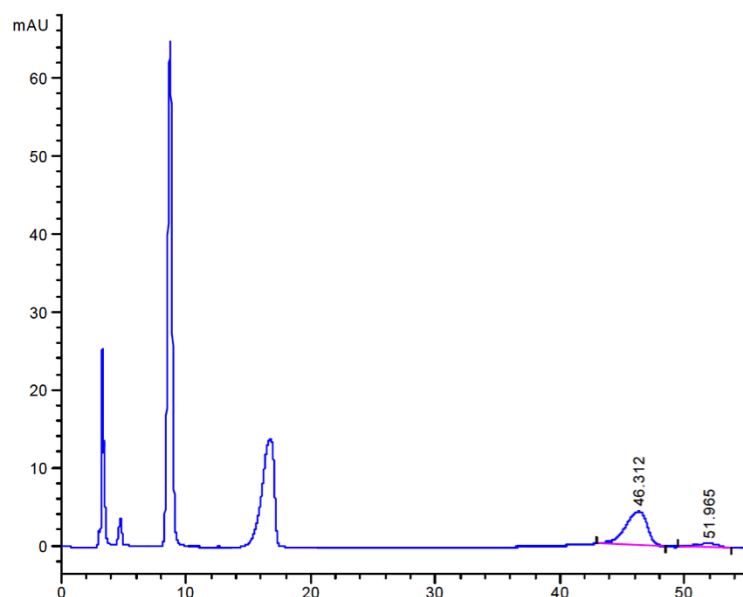

| Peak# | RetentionTime<br>min | Rel.Area<br>% |
|-------|----------------------|---------------|
| 1     | 46.312               | 89.9368       |
| 2     | 51.965               | 10.0632       |

**Following the general procedure E.** HPLC analysis of the crude residue indicated a ratio indole/**18i** of 87:13 and an enantiomeric excess of (+) **8** [Chiralpak IA column, 250 bar, T = 30 °C, *n*-Hexane/*i*-PrOH = 97:3, 1 mL/min,  $\lambda$  = 280 nm,  $t_R$  = 47.897 min and  $t_R$  = 54.957 min].

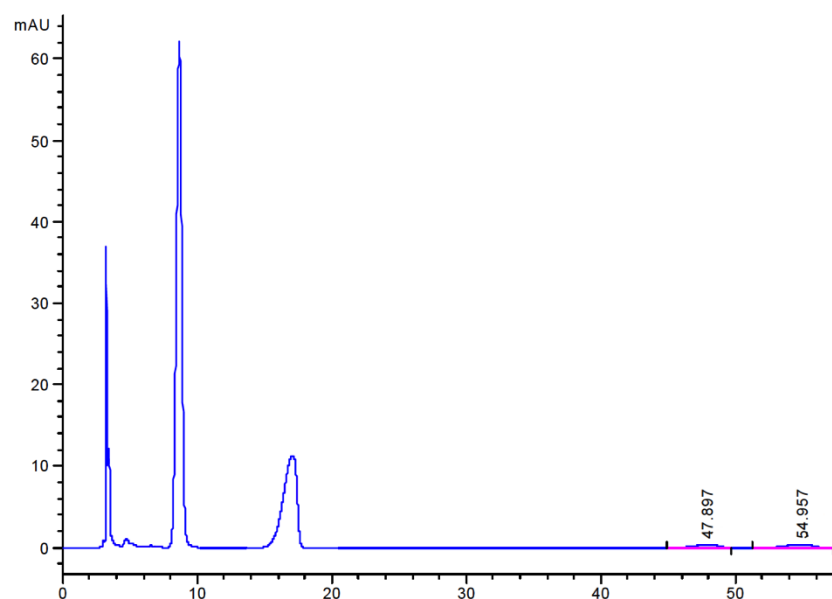

| Peak# | RetentionTime<br>min | Rel. Area<br>% |
|-------|----------------------|----------------|
| 1     | 47.897               | 46.074         |
| 2     | 54.957               | 53.926         |

**j. HPLC chromatograms of compound (18j)**

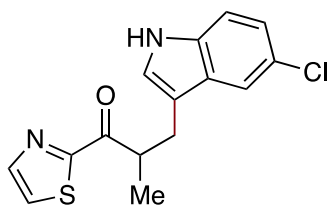

**Racemic** [Chiralpak IA column, 100 bar, T = 20 °C, *n*-Heptane (+ 0.1% diethylamine)/EtOH (+ 0.1% diethylamine) = 97:3, 1 mL/min,  $\lambda$  = 300 nm,  $t_R$  = 26.413 min and  $t_R$  = 32.027 min].

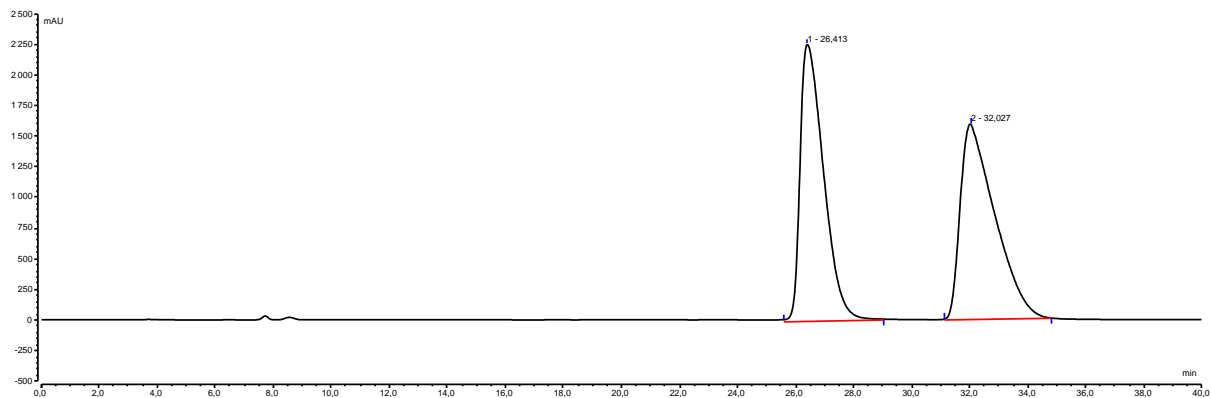

| Peak Name | Retention Time<br>min | Rel.Area<br>% |
|-----------|-----------------------|---------------|
| 1         | 26,413                | 48,76         |
| 2         | 32,027                | 51,24         |

**Indole** [Chiralpak IA column, 100 bar, T = 20 °C, *n*-Heptane (+ 0.1% diethylamine)/EtOH (+ 0.1% diethylamine) = 97:3, 1 mL/min,  $\lambda$  = 300 nm,  $t_R$  = 14.613 min].

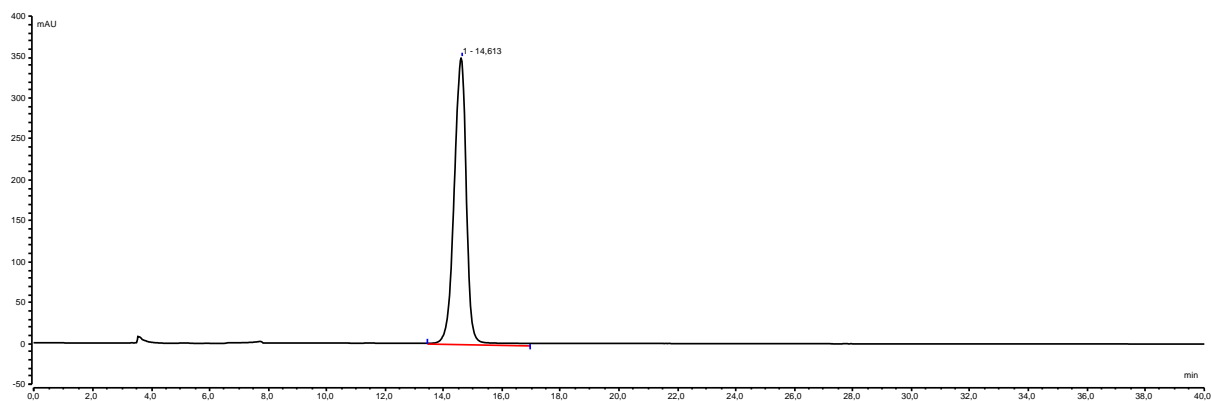

| Peak Name | Retention Time<br>min | Rel.Area<br>% |
|-----------|-----------------------|---------------|
| 1         | 14,613                | 100           |

**Following the general procedure A.** HPLC analysis of the crude residue indicated a ratio indole/**18j** of 31:69 and an enantiomeric excess of (+) **19** [Chiralpak IA column, 100 bar, T = 20 °C, *n*-Heptane (+ 0.1% diethylamine)/EtOH (+ 0.1% diethylamine) = 97:3, 1 mL/min,  $\lambda$  = 300 nm,  $t_R$  = 27.137 min and  $t_R$  = 33.580 min].

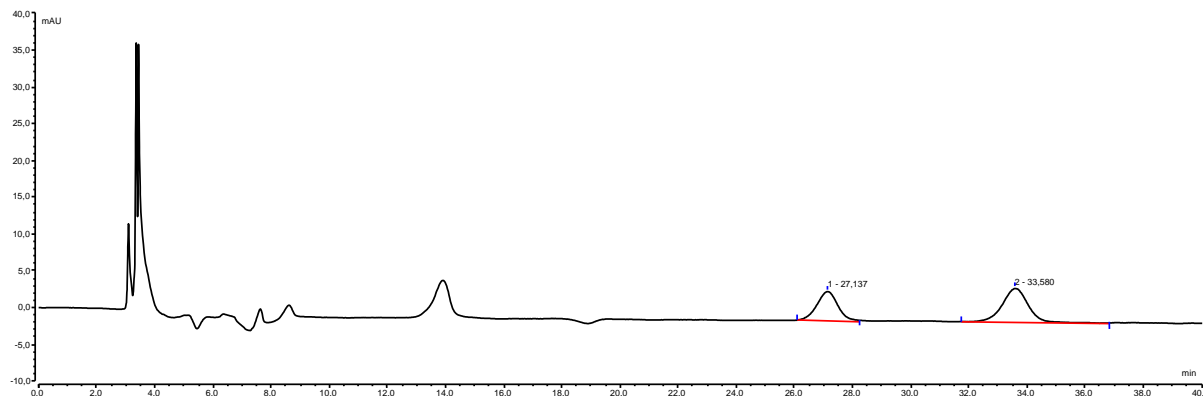

| Peak Name | Retention Time<br>min | Rel.Area<br>% |
|-----------|-----------------------|---------------|
| 1         | 27,137                | 40,52         |
| 2         | 33,58                 | 59,48         |

**Following the general procedure B.** HPLC analysis of the crude residue indicated a ratio indole/**18j** of 53:47 and an enantiomeric excess of (+) **4** [Chiralpak IA column, 100 bar, T = 20 °C, *n*-Heptane (+ 0.1% diethylamine)/EtOH (+ 0.1% diethylamine) = 97:3, 1 mL/min,  $\lambda$  = 300 nm,  $t_R$  = 27.190 min and  $t_R$  = 33.507 min].

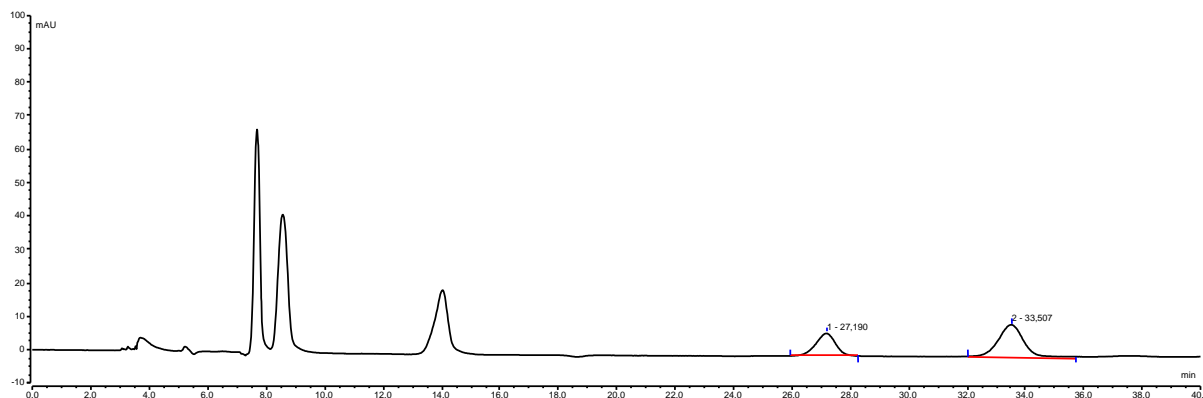

| Peak Name | Retention Time<br>min | Rel.Area<br>% |
|-----------|-----------------------|---------------|
| 1         | 33,517                | 47,83         |
| 2         | 37,587                | 52,17         |

**Following the general procedure C.** HPLC analysis of the crude residue indicated a ratio indole/**18j** of 89:11 and an enantiomeric excess of (+) **27** [Chiralpak IA column, 100 bar, T = 20 °C, *n*-Heptane (+ 0.1% diethylamine)/EtOH (+ 0.1% diethylamine) = 97:3, 1 mL/min,  $\lambda$  = 300 nm,  $t_R$  = 27.287 min and  $t_R$  = 33.593 min].

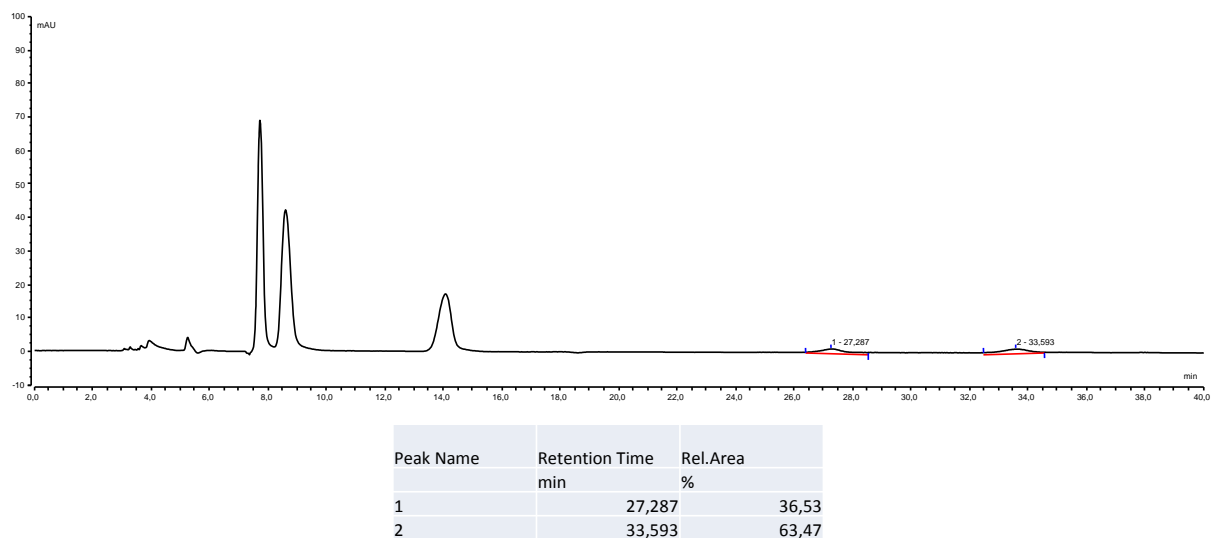

**Following the general procedure D.** HPLC analysis of the crude residue indicated a ratio indole/**18j** of 68:32 and an enantiomeric excess of (-) **63** [Chiralpak IA column, 100 bar, T = 20 °C, *n*-Heptane (+ 0.1% diethylamine)/EtOH (+ 0.1% diethylamine) = 97:3, 1 mL/min,  $\lambda$  = 300 nm,  $t_R$  = 27.233 min and  $t_R$  = 33.563 min].

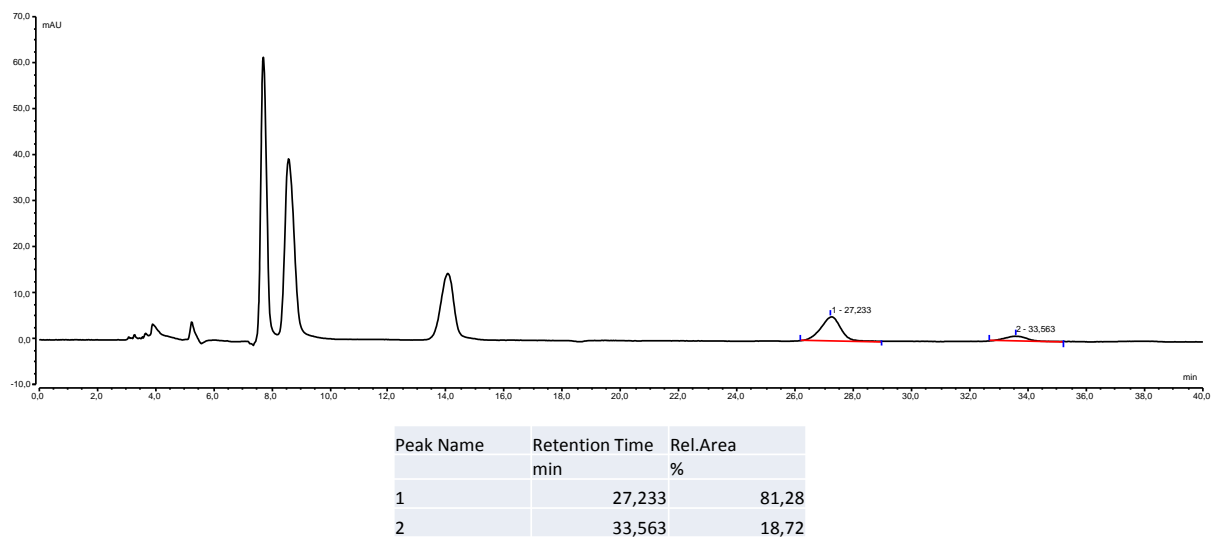

**Following the general procedure E.** HPLC analysis of the crude residue indicated a ratio indole/**18j** of 95:5 and an enantiomeric excess of (+) **7** [Chiralpak IA column, 100 bar, T = 20 °C, *n*-Heptane (+ 0.1% diethylamine)/EtOH (+ 0.1% diethylamine) = 97:3, 1 mL/min,  $\lambda$  = 300 nm,  $t_R$  = 27.243 min and  $t_R$  = 33.500 min].

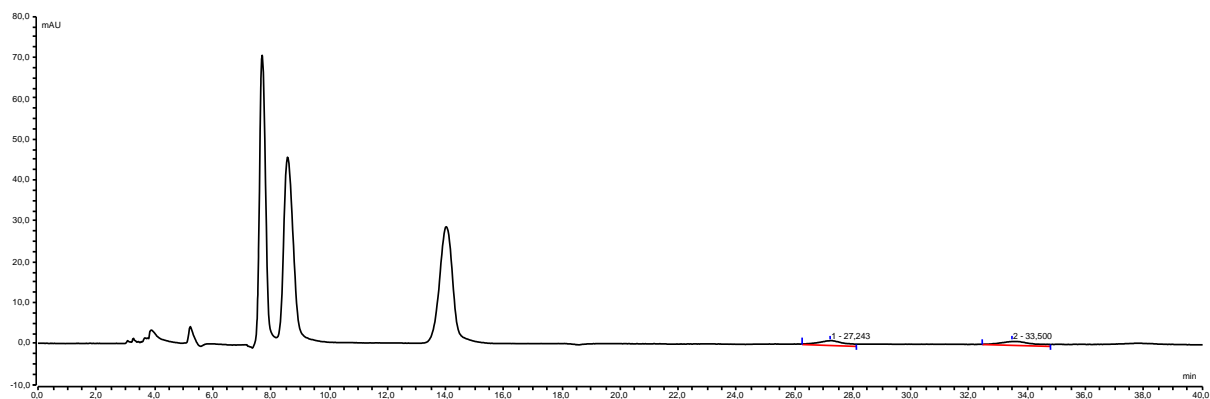

| Peak Name | Retention Time | Rel.Area |
|-----------|----------------|----------|
|           | min            | %        |
| 1         | 27,243         | 46,31    |
| 2         | 33,5           | 53,69    |

**k. HPLC chromatograms of compound (18k)**

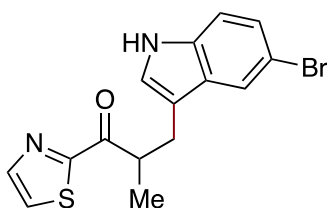

**Racemic** [Chiralpak IA column, 100 bar, T = 20 °C, *n*-Heptane (+ 0.1% diethylamine)/EtOH (+ 0.1% diethylamine) = 97:3, 1 mL/min,  $\lambda$  = 300 nm,  $t_R$  = 27.153 min and  $t_R$  = 33.570 min].

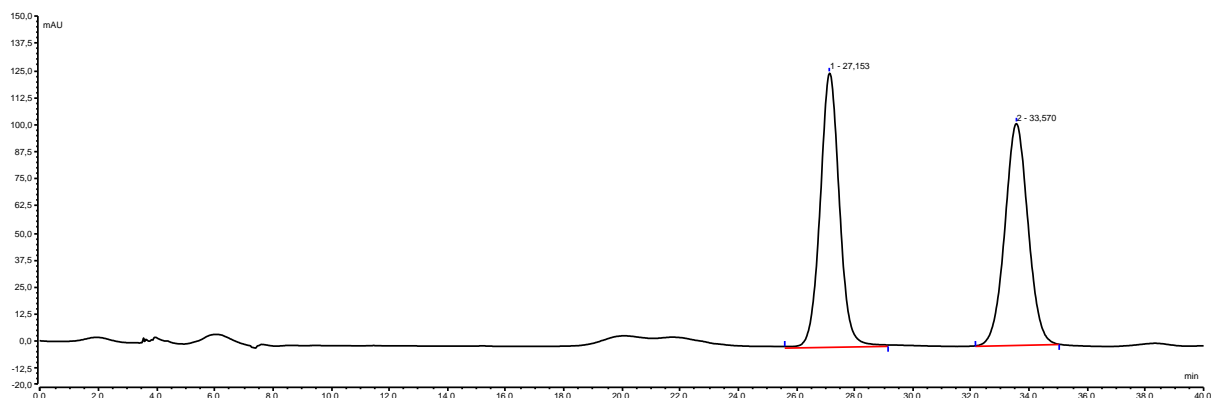

| Peak Name | Retention Time<br>min | Rel.Area<br>% |
|-----------|-----------------------|---------------|
| 1         | 27,153                | 50,18         |
| 2         | 33,57                 | 49,82         |

**Indole** [Chiralpak IA column, 100 bar, T = 20 °C, *n*-Heptane (+ 0.1% diethylamine)/EtOH (+ 0.1% diethylamine) = 97:3, 1 mL/min,  $\lambda$  = 300 nm,  $t_R$  = 14.877 min].

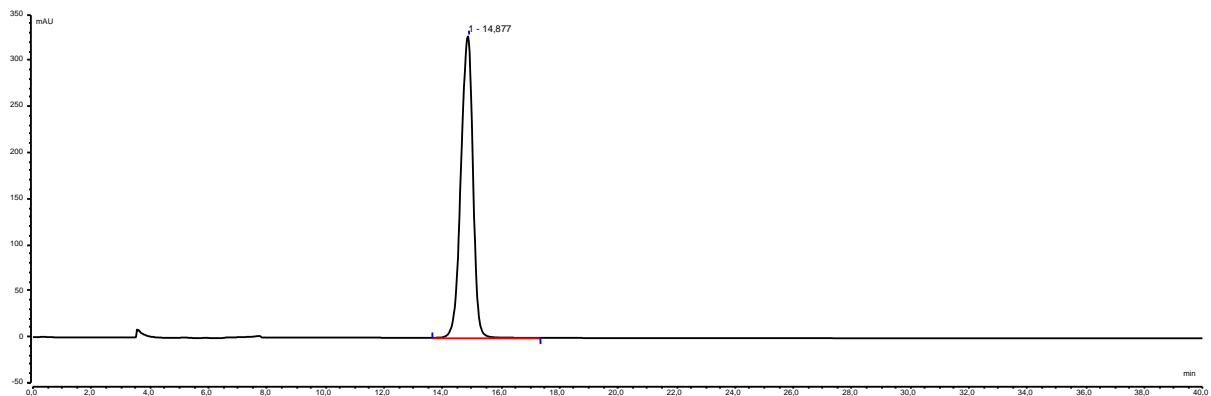

| Peak Name | Retention Time<br>min | Rel.Area<br>% |
|-----------|-----------------------|---------------|
| 1         | 14,877                | 100           |

**Following the general procedure A.** HPLC analysis of the crude residue indicated a ratio indole/**18k** of 30:70 and an enantiomeric excess of (+) **16** [Chiralpak IA column, 100 bar, T = 20 °C, *n*-Heptane (+ 0.1% diethylamine)/EtOH (+ 0.1% diethylamine) = 97:3, 1 mL/min,  $\lambda$  = 300 nm,  $t_R$  = 27.437 min and  $t_R$  = 33.980 min].

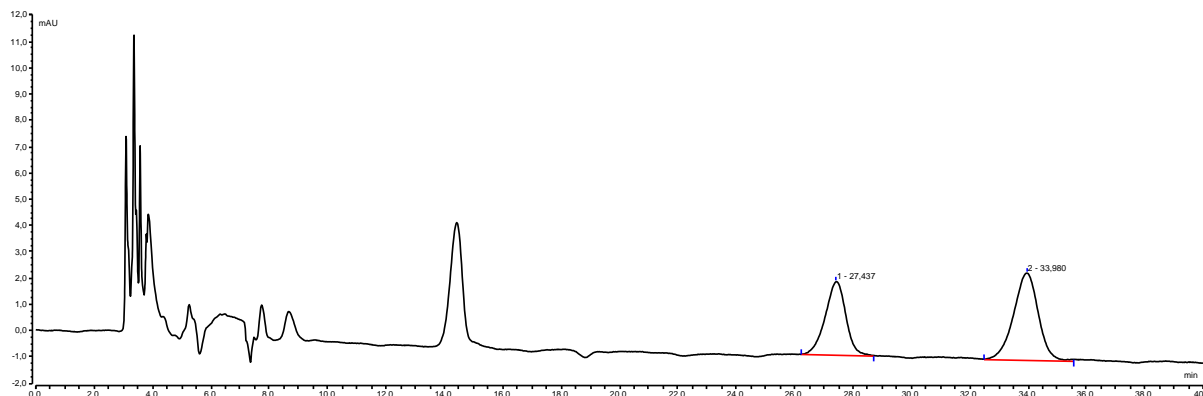

| Peak Name | Retention Time<br>min | Rel.Area<br>% |
|-----------|-----------------------|---------------|
| 1         | 27,437                | 41,86         |
| 2         | 33,98                 | 58,14         |

**Following the general procedure B.** HPLC analysis of the crude residue indicated a ratio indole/**18k** of 63:37 and an enantiomeric excess of (+) **20** [Chiralpak IA column, 100 bar, T = 20 °C, *n*-Heptane (+ 0.1% diethylamine)/EtOH (+ 0.1% diethylamine) = 97:3, 1 mL/min,  $\lambda$  = 300 nm,  $t_R$  = 27.153 min and  $t_R$  = 33.583 min].

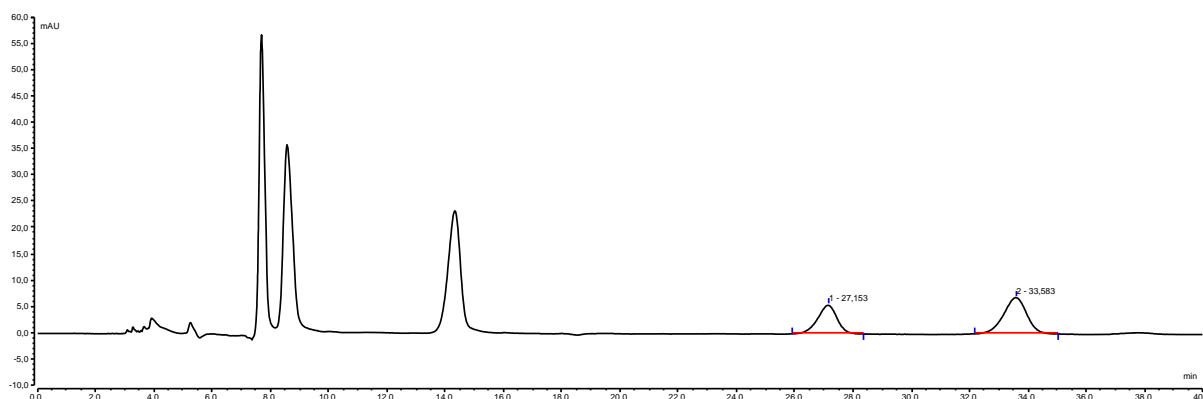

| Peak Name | Retention Time<br>min | Rel.Area<br>% |
|-----------|-----------------------|---------------|
| 1         | 27,153                | 39,97         |
| 2         | 33,583                | 60,03         |



**Following the general procedure C.** HPLC analysis of the crude residue indicated a ratio indole/**18k** of 90:10 and an enantiomeric excess of (+) **11** [Chiralpak IA column, 100 bar, T = 20 °C, *n*-Heptane (+ 0.1% diethylamine)/EtOH (+ 0.1% diethylamine) = 97:3, 1 mL/min,  $\lambda$  = 300 nm,  $t_R$  = 27.137 min and  $t_R$  = 33.657 min].

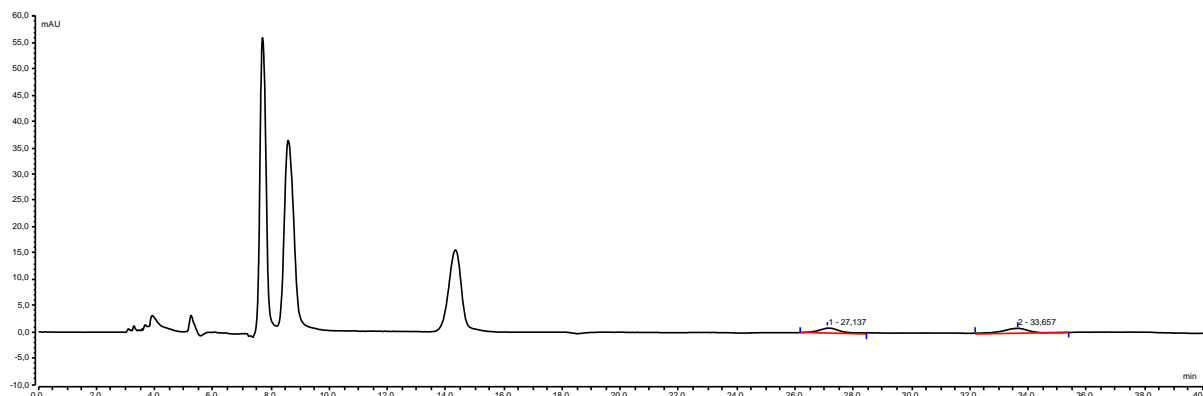

| Peak Name | Retention Time<br>min | Rel.Area<br>% |
|-----------|-----------------------|---------------|
| 1         | 27,137                | 44,68         |
| 2         | 33,657                | 55,32         |

**Following the general procedure D.** HPLC analysis of the crude residue indicated a ratio indole/**18k** of 82:18 and an enantiomeric excess of (-) **54** [Chiralpak IA column, 100 bar, T = 20 °C, *n*-Heptane (+ 0.1% diethylamine)/EtOH (+ 0.1% diethylamine) = 97:3, 1 mL/min,  $\lambda$  = 300 nm,  $t_R$  = 27.147 min and  $t_R$  = 33.623 min].

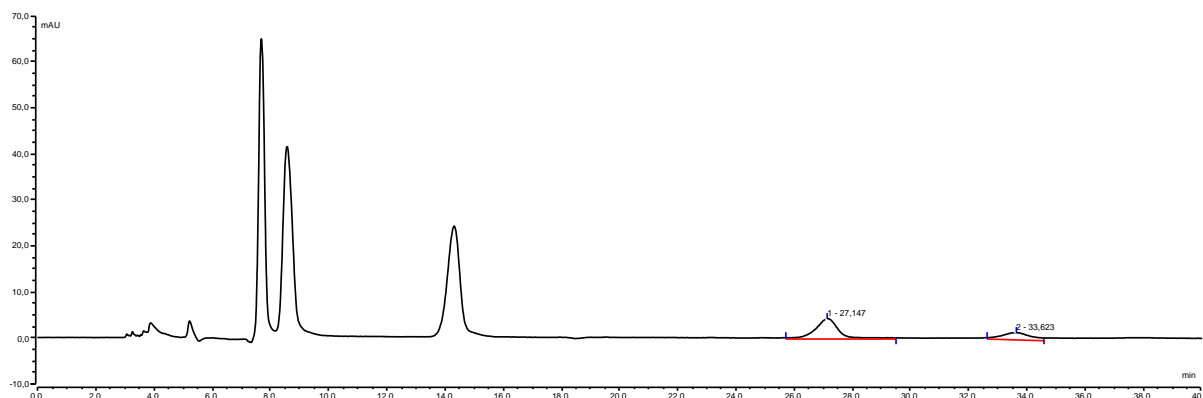

| Peak Name | Retention Time<br>min | Rel.Area<br>% |
|-----------|-----------------------|---------------|
| 1         | 27,147                | 77,01         |
| 2         | 33,623                | 22,99         |

**Following the general procedure E.** HPLC analysis of the crude residue indicated a ratio indole/**18k** of 96:4 and an enantiomeric excess of (+) **19** [Chiralpak IA column, 100 bar, T = 20 °C, *n*-Heptane (+ 0.1% diethylamine)/EtOH (+ 0.1% diethylamine) = 97:3, 1 mL/min,  $\lambda$  = 300 nm,  $t_R$  = 27.117 min and  $t_R$  = 33.543 min].

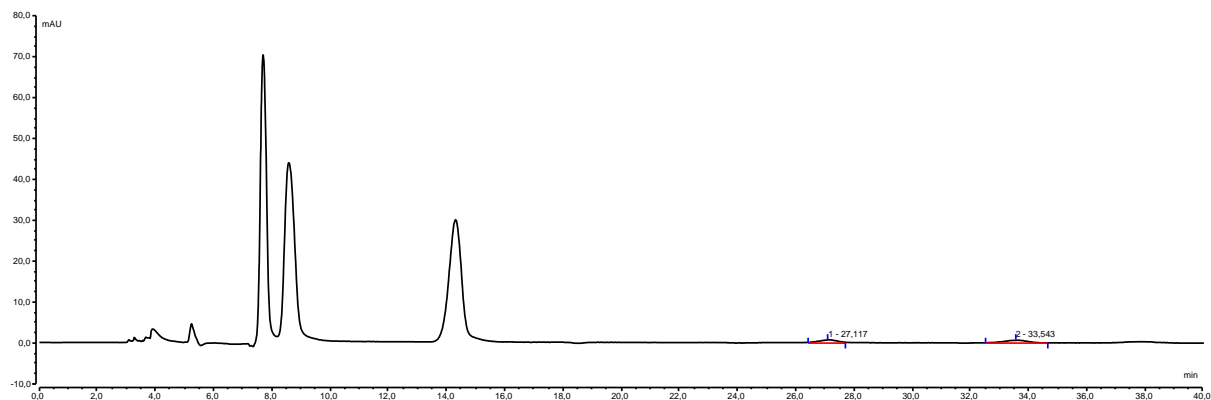

| Peak Name | Retention Time<br>min | Rel.Area<br>% |
|-----------|-----------------------|---------------|
| 1         | 27,117                | 40,41         |
| 2         | 33,543                | 59,59         |

### 1. HPLC chromatograms of compound (18l)

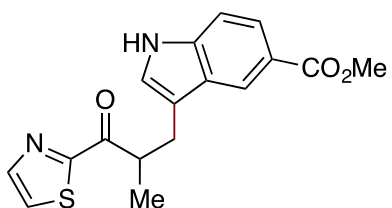

**Racemic** [Chiralpak IA column, 250 bar, T = 30 °C, *n*-Hexane/*i*-PrOH = 95:5, 1 mL/min,  $\lambda$  = 280 nm,  $t_R$  = 51.429 min and  $t_R$  = 57.744 min].

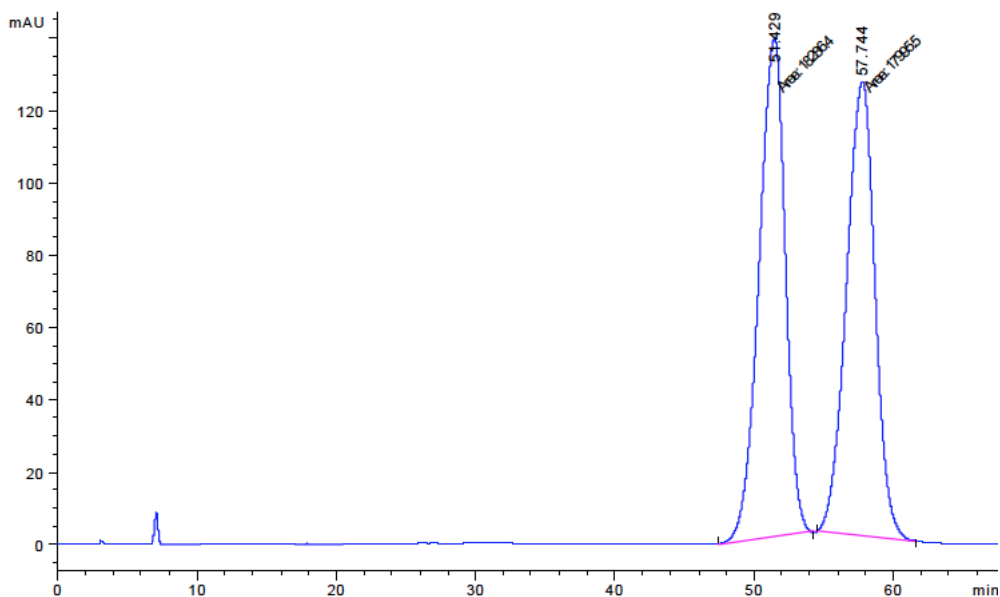

| Peak# | RetentionTime<br>min | Rel.Area<br>% |
|-------|----------------------|---------------|
| 1     | 51.429               | 50.4008       |
| 2     | 57.744               | 49.5992       |

**Indole** [Chiralpak IA column, 250 bar, T = 30 °C, *n*-Hexane/*i*-PrOH = 95:5, 1 mL/min,  $\lambda$  = 280 nm,  $t_R$  = 24.381 min].

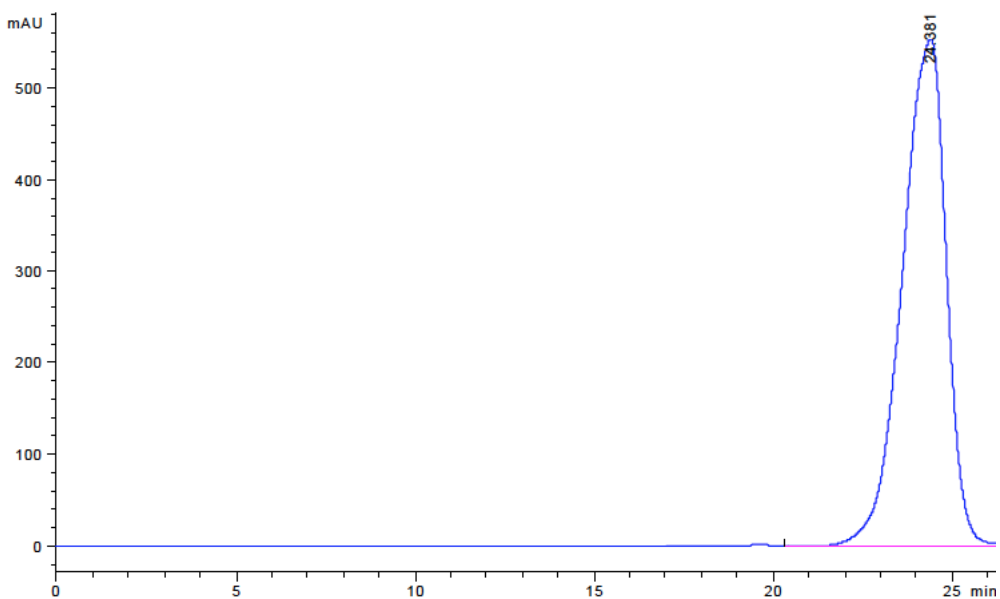

**Following the general procedure A.** HPLC analysis of the crude residue indicated a ratio indole/**18I** of 57:43 and an enantiomeric excess of (+) 23 [Chiralpak IA column, 250 bar, T = 30 °C, *n*-Hexane/*i*-PrOH = 95:5, 1 mL/min,  $\lambda$  = 280 nm,  $t_R$  = 51.608 min and  $t_R$  = 57.735 min].

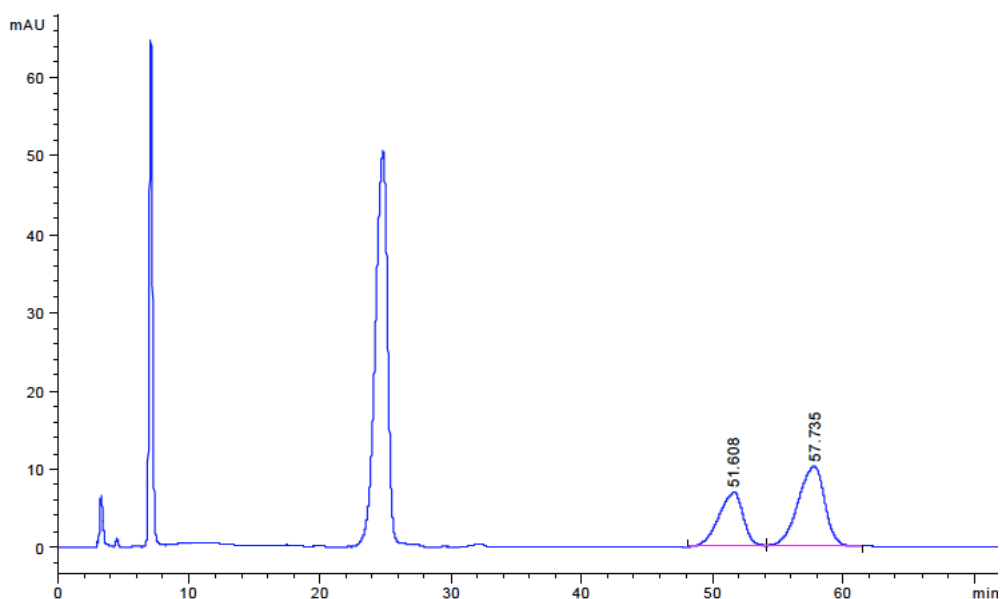

| Peak# | RetentionTime | Rel.Area |
|-------|---------------|----------|
|       | min           | %        |
| 1     | 51.608        | 38.7279  |
| 2     | 57.735        | 61.2721  |

**Following the general procedure B.** HPLC analysis of the crude residue indicated a ratio indole/**18I** of 76:24 and an enantiomeric excess of (+) 24 [Chiralpak IA column, 250 bar, T = 30 °C, *n*-Hexane/*i*-PrOH = 95:5, 1 mL/min,  $\lambda$  = 280 nm,  $t_R$  = 51.501 min and  $t_R$  = 57.730 min].

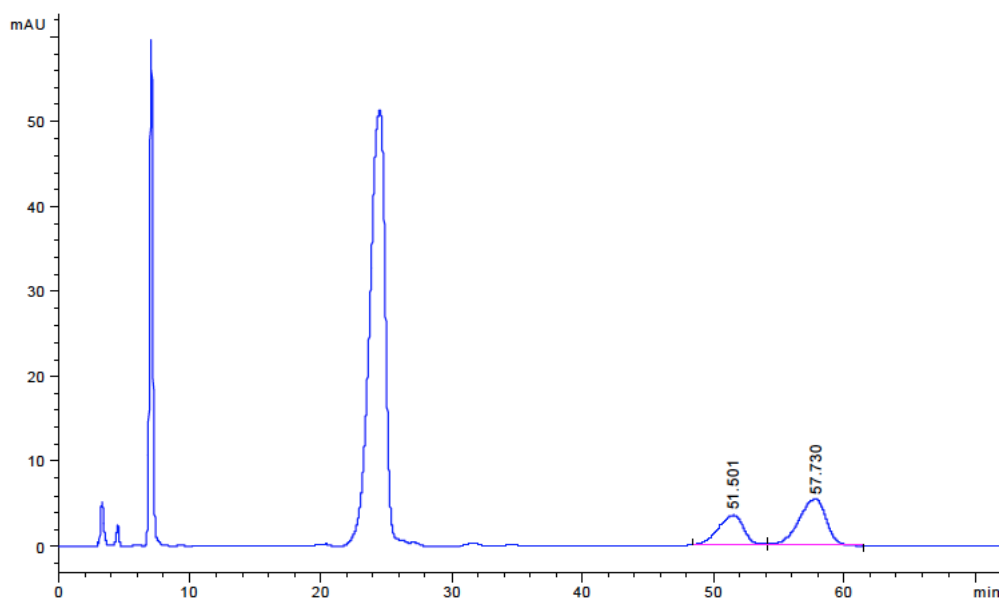

| Peak# | RetentionTime | Rel.Area |
|-------|---------------|----------|
|       | min           | %        |
| 1     | 51.501        | 38.1842  |
| 2     | 57.73         | 61.8158  |

**Following the general procedure C.** HPLC analysis of the crude residue did not detect any product [Chiralpak IA column, 250 bar, T = 30 °C, *n*-Hexane/*i*-PrOH = 95:5, 1 mL/min,  $\lambda$  = 280 nm].

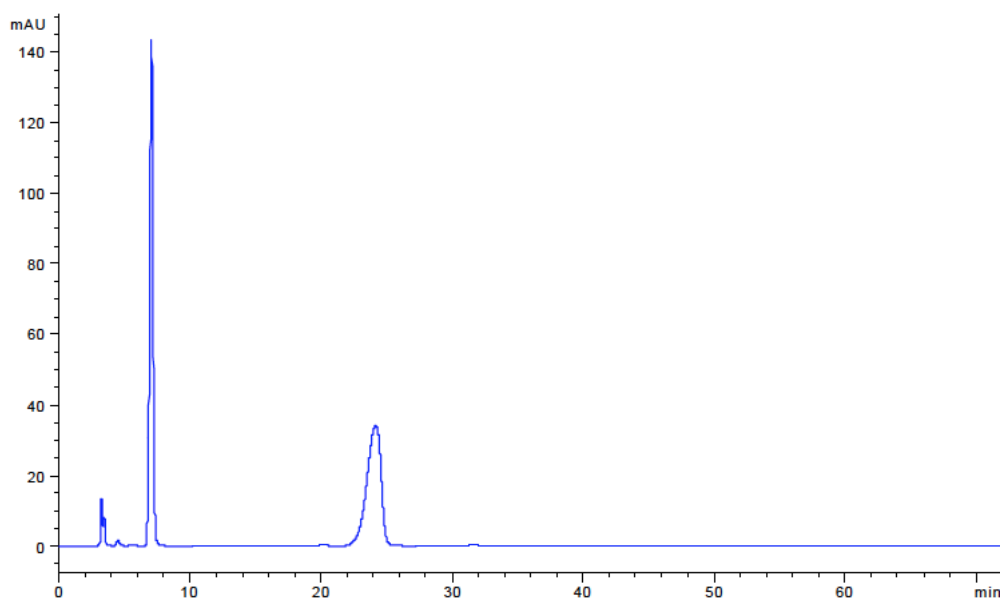

**Following the general procedure D.** HPLC analysis of the crude residue indicated a ratio indole/**18l** of 91:9 and an enantiomeric excess of (-) 49 [Chiralpak IA column, 250 bar, T = 30 °C, *n*-Hexane/*i*-PrOH = 95:5, 1 mL/min,  $\lambda$  = 280 nm,  $t_R$  = 52.021 min and  $t_R$  = 58.393 min].

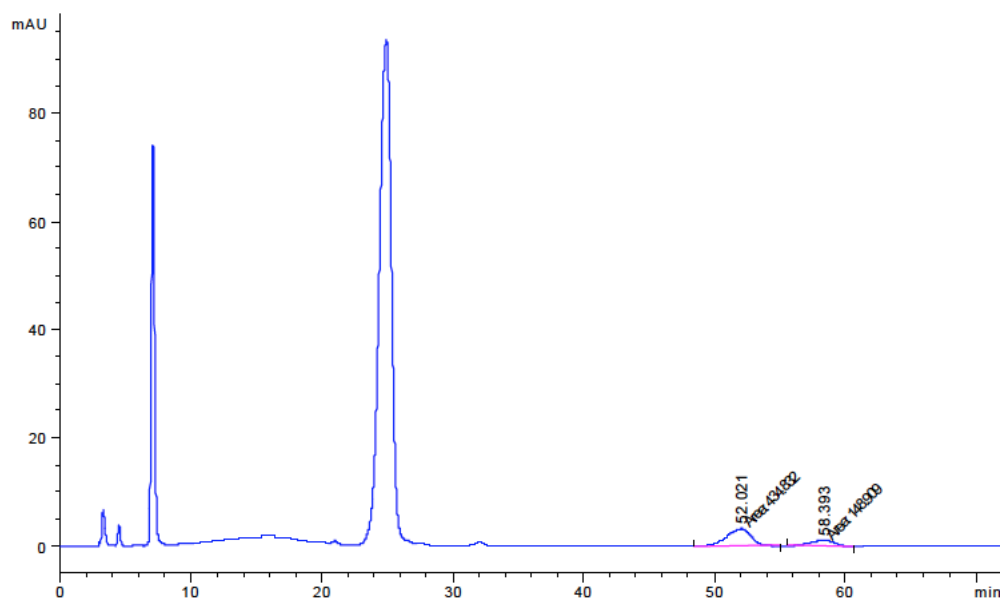

| Peak# | RetentionTime<br>min | Rel.Area<br>% |
|-------|----------------------|---------------|
| 1     | 52.021               | 74.4905       |
| 2     | 58.393               | 25.5095       |

**Following the general procedure E.** HPLC analysis of the crude residue did not detect any product [Chiralpak IA column, 250 bar, T = 30 °C, *n*-Hexane/*i*-PrOH = 95:5, 1 mL/min,  $\lambda$  = 280 nm].

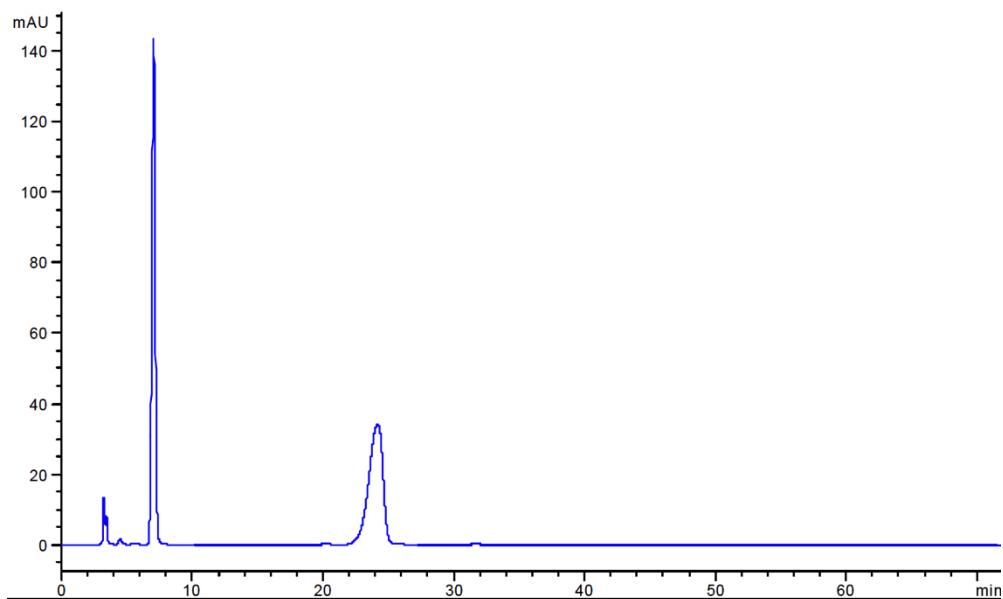

**m. HPLC chromatograms of compound (18m)**

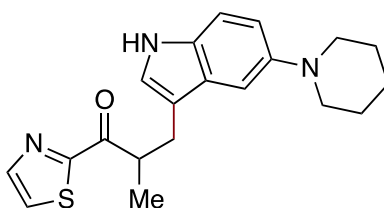

**Racemic** [Chiralpak IB column, 250 bar, T = 30 °C, *n*-Hexane/*i*-PrOH = 92:8, 1 mL/min,  $\lambda$  = 300 nm,  $t_R$  = 27.286 min and  $t_R$  = 34.958 min].

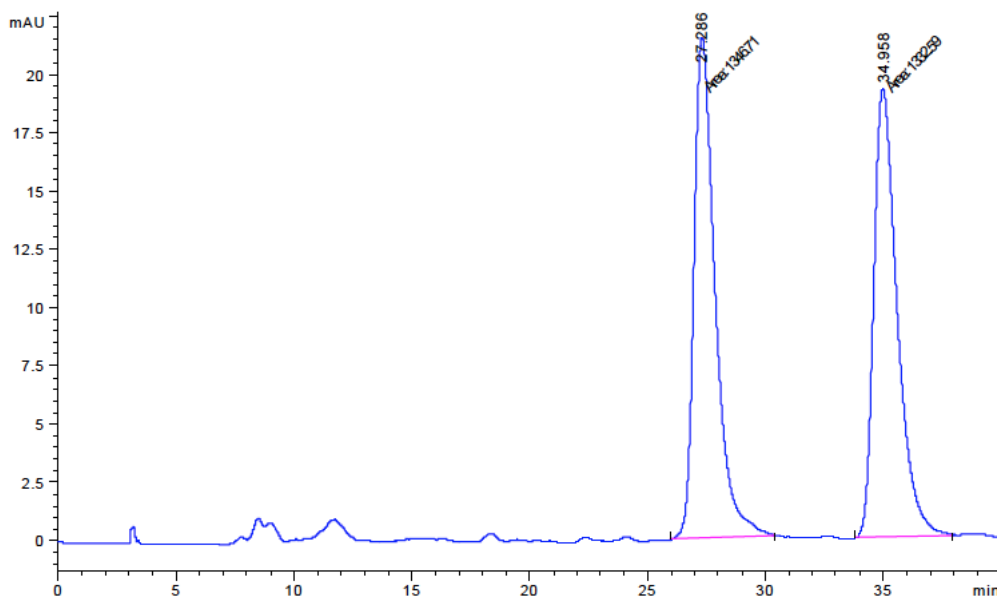

| Peak# | RetentionTime<br>min | Rel.Area<br>% |
|-------|----------------------|---------------|
| 1     | 27.286               | 50.2633       |
| 2     | 34.958               | 49.7367       |

**Indole** [Chiralpak IA column, 250 bar, T = 30 °C, *n*-Hexane/*i*-PrOH = 90:10, 1 mL/min,  $\lambda$  = 300 nm,  $t_R$  = 16.386 min].

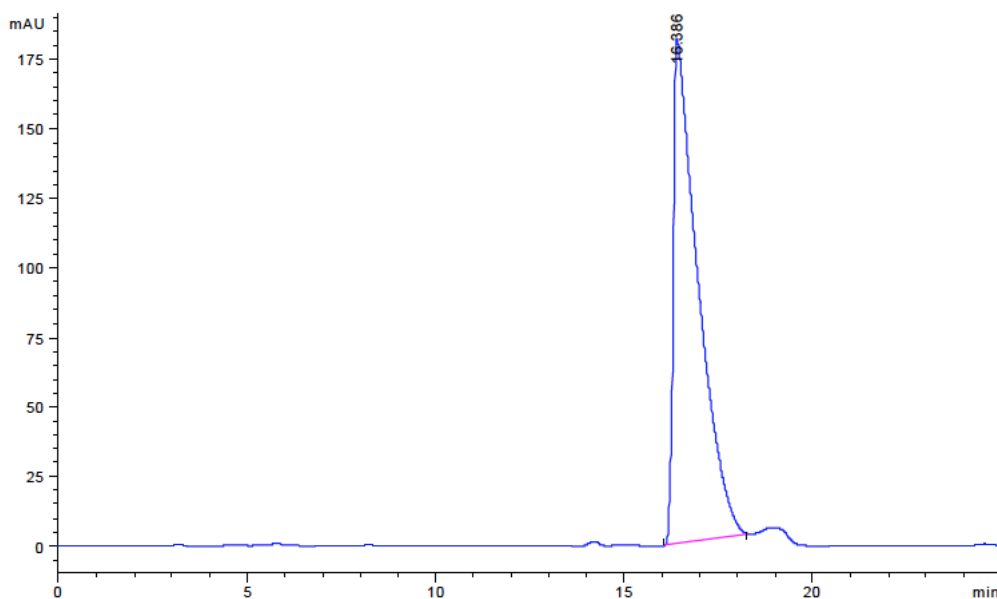

**Following the general procedure A.** HPLC analysis of the crude residue indicated a ratio indole/**18m** of 5:95 and an enantiomeric excess of (+) **72** [Chiralpak IB column, 250 bar, T = 30 °C, *n*-Hexane/*i*-PrOH = 92:8, 1 mL/min,  $\lambda$  = 300 nm,  $t_R$  = 28.374 min and  $t_R$  = 37.377 min].

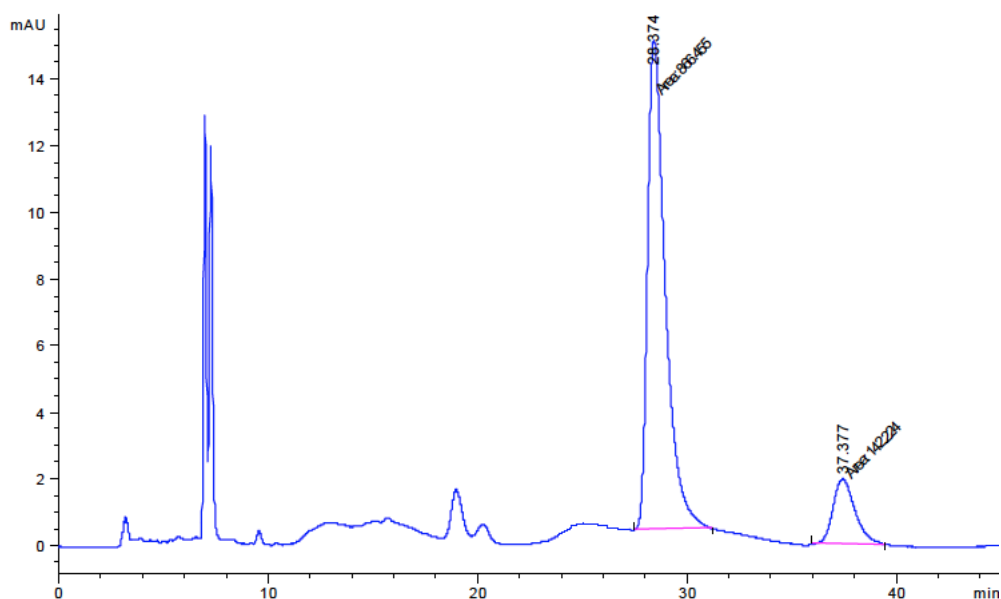

| Peak# | RetentionTime<br>min | Rel.Area<br>% |
|-------|----------------------|---------------|
| 1     | 28.374               | 85.8999       |
| 2     | 37.377               | 14.1001       |

**Following the general procedure B.** HPLC analysis of the crude residue indicated a ratio indole/**18m** of 16:84 and an enantiomeric excess of (+) **72** [Chiralpak IB column, 250 bar, T = 30 °C, *n*-Hexane/*i*-PrOH = 92:8, 1 mL/min,  $\lambda$  = 300 nm,  $t_R$  = 28.261 min and  $t_R$  = 37.161 min].

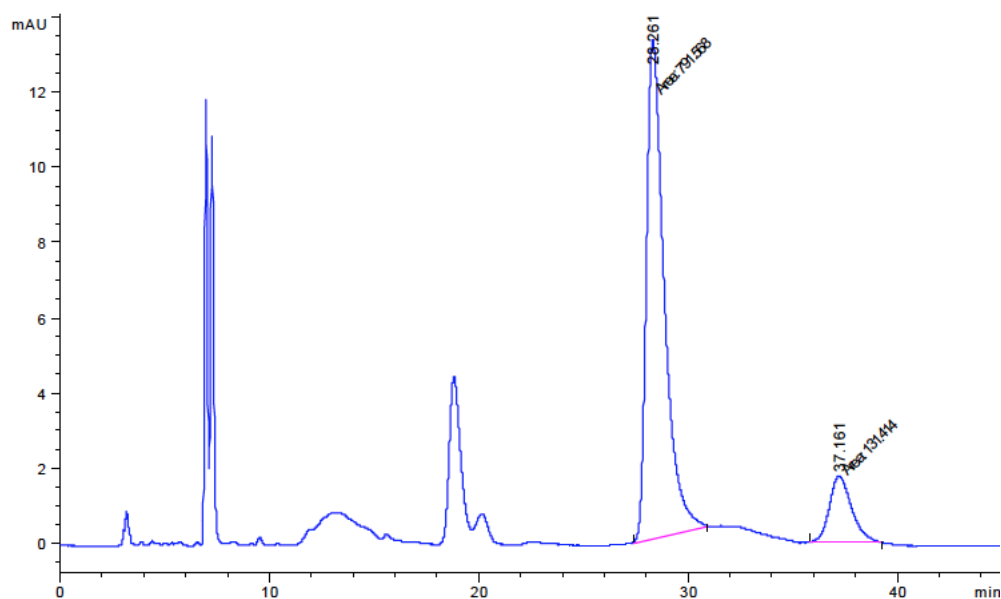

| Peak# | RetentionTime<br>min | Rel.Area<br>% |
|-------|----------------------|---------------|
| 1     | 28.261               | 85.762        |
| 2     | 37.161               | 14.238        |



**Following the general procedure C.** HPLC analysis of the crude residue did not detect any product [Chiralpak IB column, 250 bar, T = 30 °C, *n*-Hexane/*i*-PrOH = 92:8, 1 mL/min,  $\lambda$  = 300 nm].

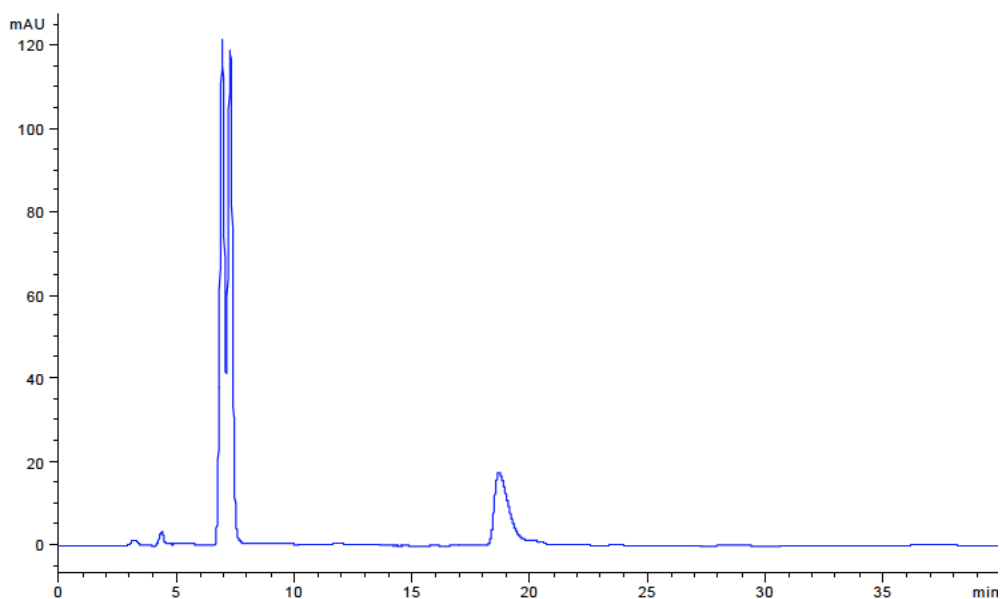

**Following the general procedure D.** HPLC analysis of the crude residue indicated a ratio indole/**18m** of 53:47 and an enantiomeric excess of (-) 67 [Chiralpak IB column, 250 bar, T = 30 °C, *n*-Hexane/*i*-PrOH = 92:8, 1 mL/min,  $\lambda$  = 300 nm,  $t_R$  = 28.587 min and  $t_R$  = 37.376 min].

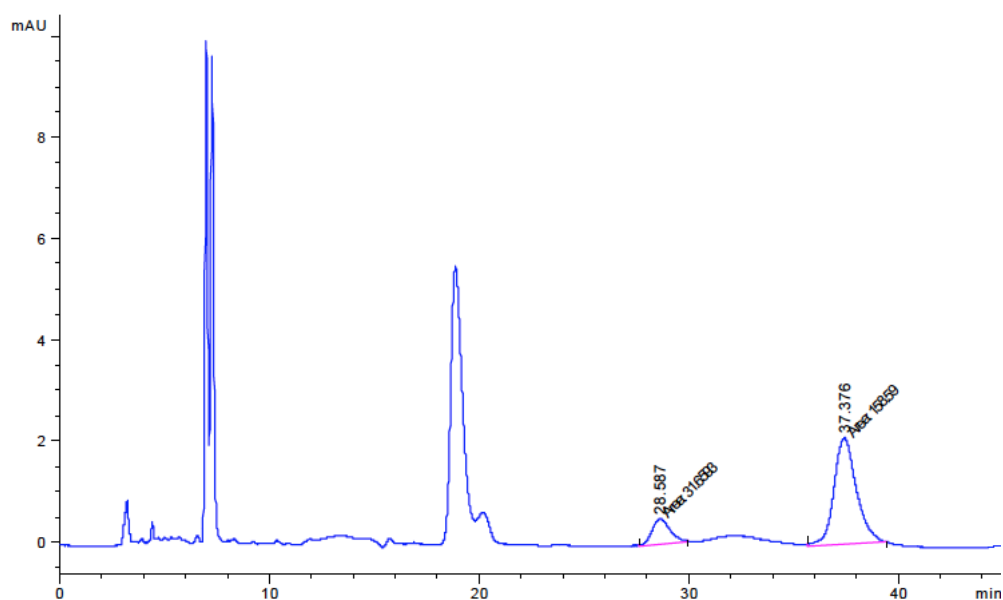

| Peak# | RetentionTime<br>min | Rel.Area<br>% |
|-------|----------------------|---------------|
| 1     | 28.587               | 16.6409       |
| 2     | 37.376               | 83.3591       |

**Following the general procedure E.** HPLC analysis of the crude residue detected traces of **18m** and an enantiomeric excess of (+) **4** [Chiralpak IB column, 250 bar, T = 30 °C, *n*-Hexane/*i*-PrOH = 92:8, 1 mL/min,  $\lambda$  = 300 nm,  $t_R$  = 28.552 min and  $t_R$  = 37.394 min].

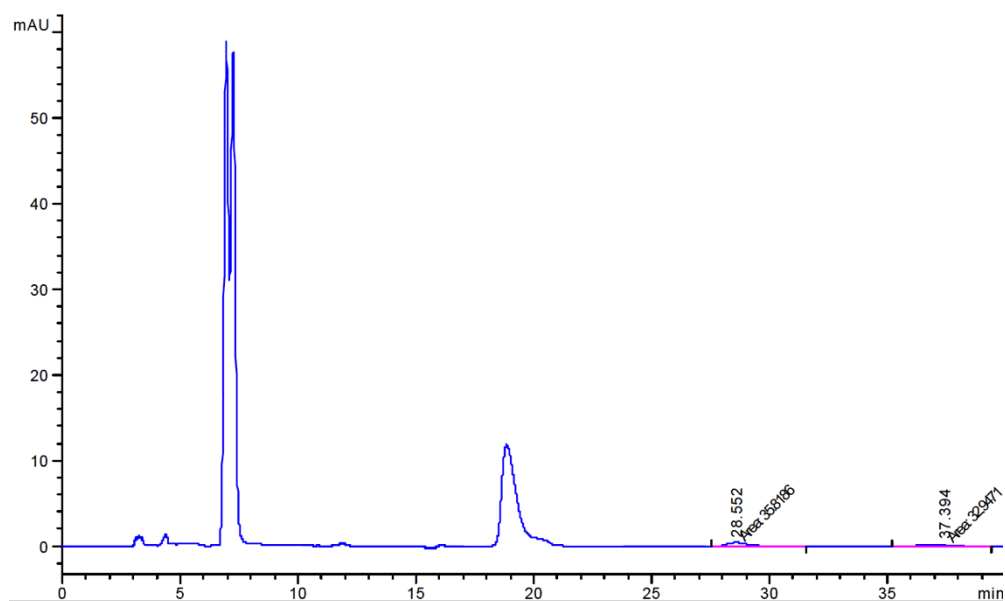

| Peak# | RetentionTime | Rel.Area |
|-------|---------------|----------|
|       | min           | %        |
| 1     | 28.552        | 52.0879  |
| 2     | 37.394        | 47.9121  |

**n. HPLC chromatograms of compound (18n)**

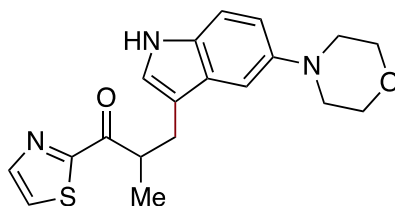

**Racemic** [Chiralpak IA column, 250 bar, T = 30 °C, *n*-Hexane/*i*-PrOH = 90:10, 1 mL/min,  $\lambda$  = 280 nm,  $t_R$  = 29.559 min and  $t_R$  = 34.195 min].

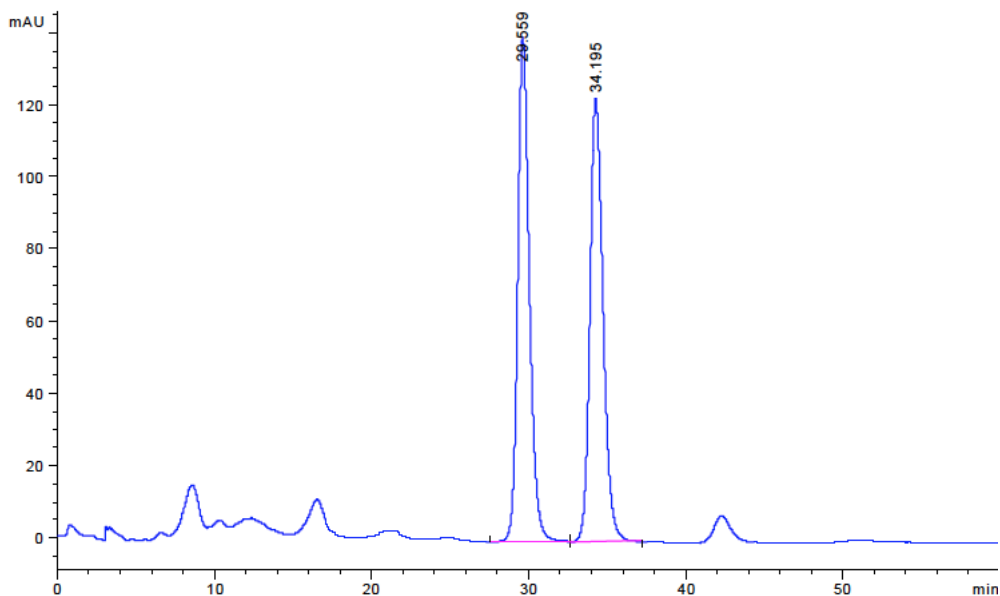

| Peak# | RetentionTime<br>min | Rel.Area<br>% |
|-------|----------------------|---------------|
| 1     | 29.559               | 50.329        |
| 2     | 34.195               | 49.671        |

**Indole** [Chiralpak IA column, 250 bar, T = 30 °C, *n*-Hexane/*i*-PrOH = 90:10, 1 mL/min,  $\lambda$  = 280 nm,  $t_R$  = 14.237 min].

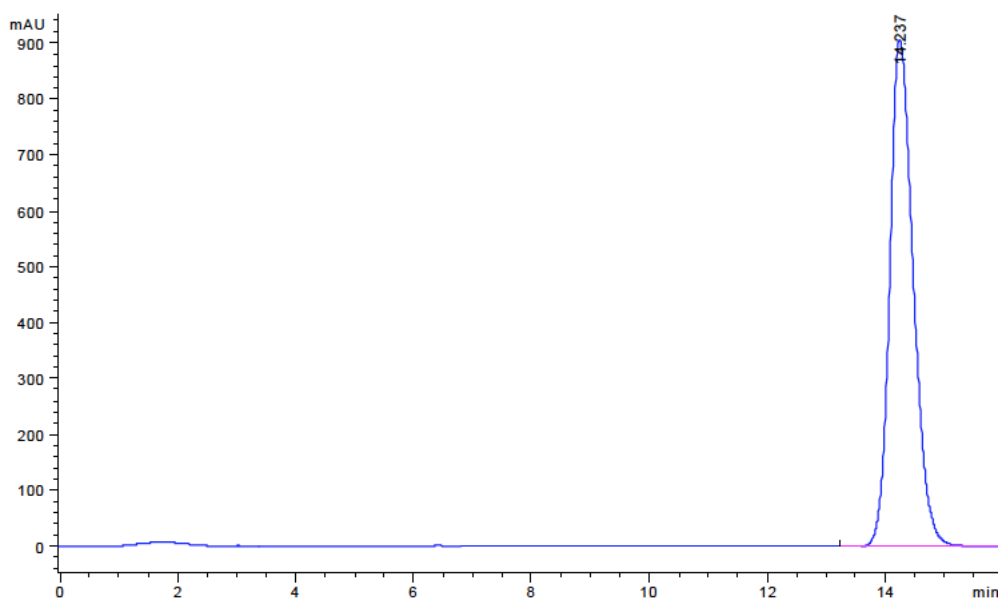

**Following the general procedure A.** HPLC analysis of the crude residue indicated a ratio indole/**18n** of 24:76 and an enantiomeric excess of (+) **79** [Chiralpak IA column, 250 bar, T = 30 °C, *n*-Hexane/*i*-PrOH = 90:10, 1 mL/min,  $\lambda$  = 280 nm,  $t_R$  = 30.642 min and  $t_R$  = 35.224 min].

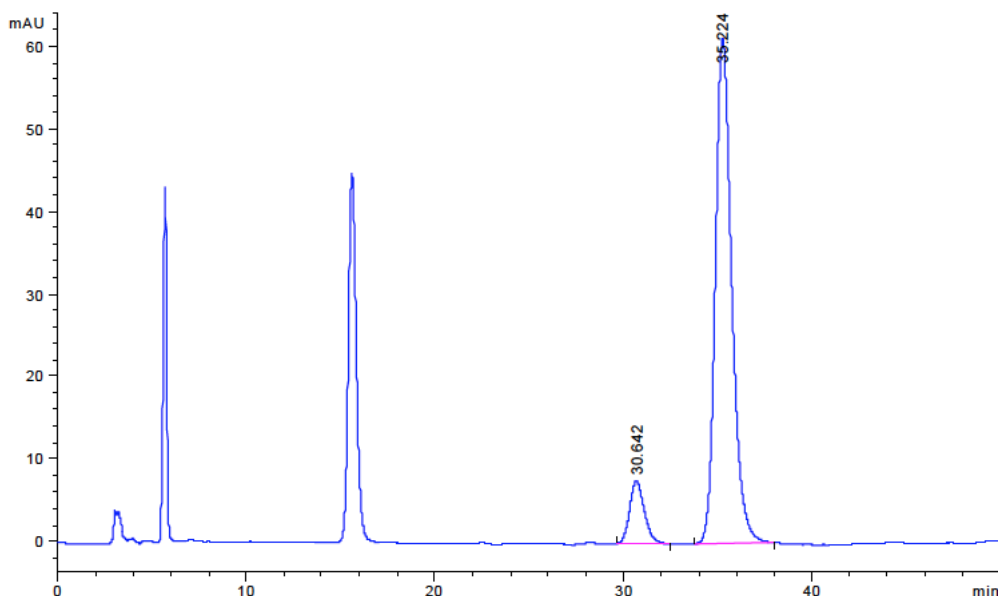

| Peak# | RetentionTime<br>min | Rel.Area<br>% |
|-------|----------------------|---------------|
| 1     | 30.642               | 10.2967       |
| 2     | 35.224               | 89.7033       |

**Following the general procedure B.** HPLC analysis of the crude residue indicated a ratio indole/**18n** of 23:77 and an enantiomeric excess of (+) **71** [Chiralpak IA column, 250 bar, T = 30 °C, *n*-Hexane/*i*-PrOH = 90:10, 1 mL/min,  $\lambda$  = 280 nm,  $t_R$  = 30.544 min and  $t_R$  = 35.111 min].

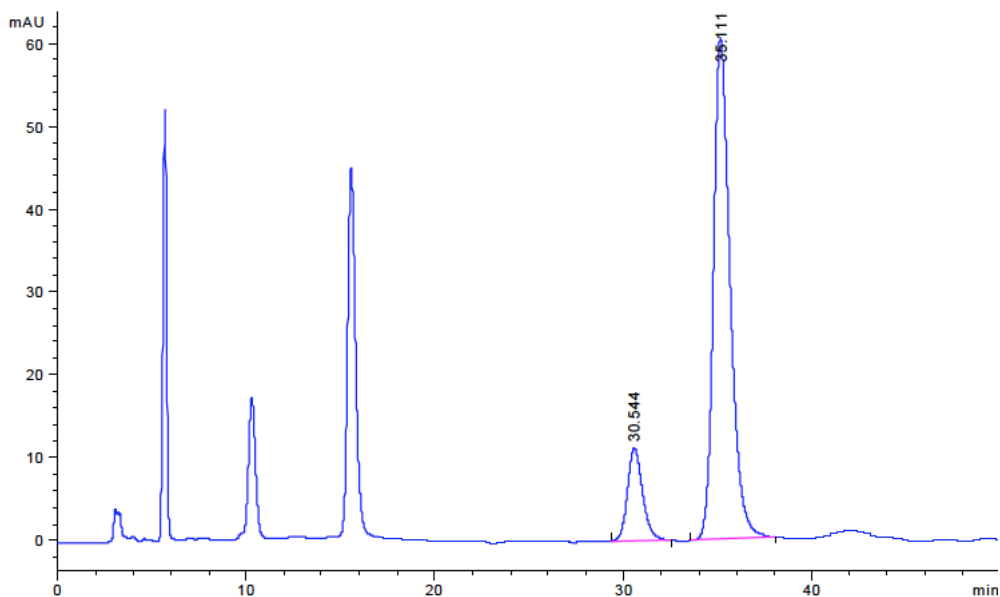

| Peak# | RetentionTime<br>min | Rel.Area<br>% |
|-------|----------------------|---------------|
| 1     | 30.544               | 14.619        |
| 2     | 35.111               | 85.381        |

**Following the general procedure C.** HPLC analysis of the crude residue indicated a ratio indole/**18n** of 94:6 and an enantiomeric excess of (+) 8 [Chiralpak IA column, 250 bar, T = 30 °C, *n*-Hexane/*i*-PrOH = 90:10, 1 mL/min,  $\lambda$  = 280 nm,  $t_R$  = 29.938 min and  $t_R$  = 34.499 min].

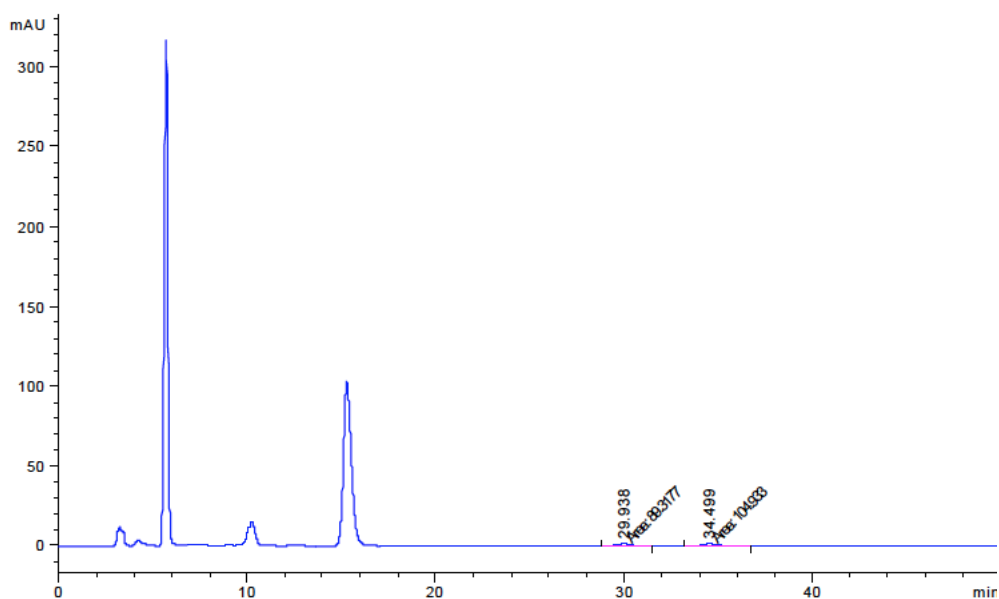

| Peak# | RetentionTime<br>min | Rel.Area<br>% |
|-------|----------------------|---------------|
| 1     | 29.938               | 45.9806       |
| 2     | 34.499               | 54.0194       |

**Following the general procedure D.** HPLC analysis of the crude residue indicated a ratio indole/**18n** of 50:50 and an enantiomeric excess of (-) 65 [Chiralpak IA column, 250 bar, T = 30 °C, *n*-Hexane/*i*-PrOH = 90:10, 1 mL/min,  $\lambda$  = 280 nm,  $t_R$  = 30.433 min and  $t_R$  = 35.358 min].

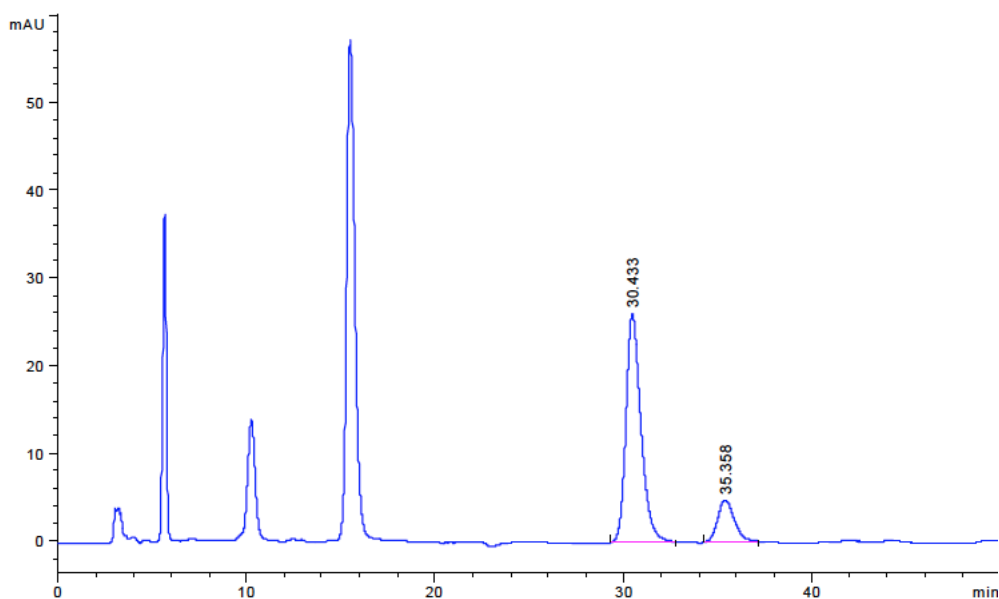

| Peak# | RetentionTime<br>min | Rel.Area<br>% |
|-------|----------------------|---------------|
| 1     | 30.433               | 82.725        |
| 2     | 35.358               | 17.275        |

**Following the general procedure E.** HPLC analysis of the crude residue indicated a ratio indole/**18n** of 87:13 and an enantiomeric excess of (+) **8** [Chiralpak IA, 250 bar, T = 30 °C, *n*-Hexane/*i*-PrOH = 90:10, 1 mL/min,  $\lambda$  = 280 nm,  $t_R$  = 30.138 min and  $t_R$  = 34.758 min].

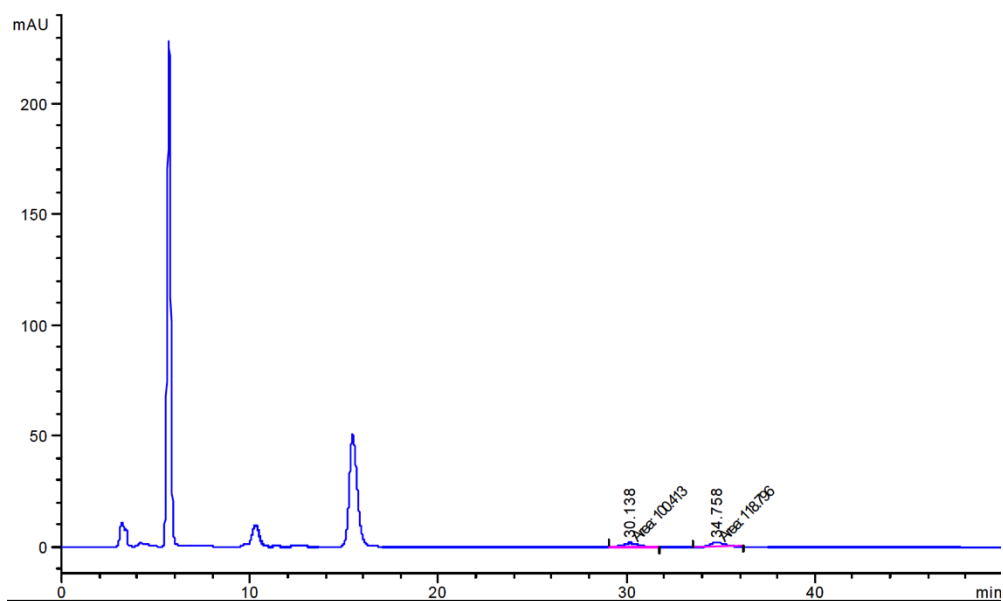

| Peak# | RetentionTime | Rel.Area |
|-------|---------------|----------|
|       | min           | %        |
| 1     | 30.138        | 45.8069  |
| 2     | 34.758        | 54.1931  |

**o. HPLC chromatograms of compound (18o)**

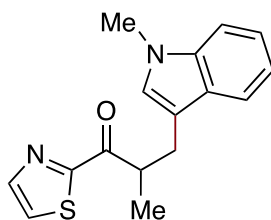

**Racemic** [Chiralpak IB column, 250 bar, T = 15 °C, *n*-Hexane/*i*-PrOH = 98:2, 0.8 mL/min,  $\lambda$  = 230 nm,  $t_R$  = 21.430 min and  $t_R$  = 25.843 min].

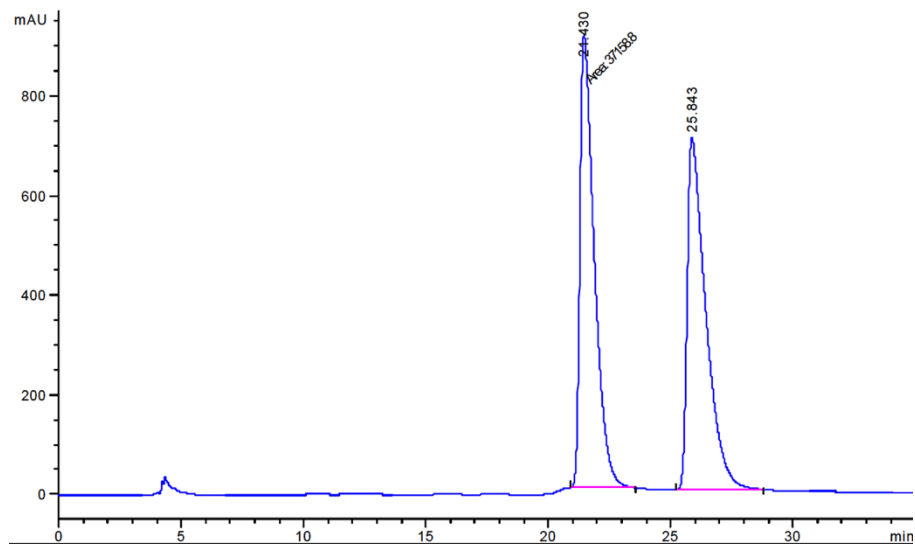

| Peak# | RetentionTime<br>min | Rel. Area<br>% |
|-------|----------------------|----------------|
| 1     | 21.43                | 49.9162        |
| 2     | 25.843               | 50.0838        |

**Indole** [Chiralpak IB column, 250 bar, T = 15 °C, *n*-Hexane/*i*-PrOH = 98:2, 0.8 mL/min,  $\lambda$  = 230 nm,  $t_R$  = 14.091].

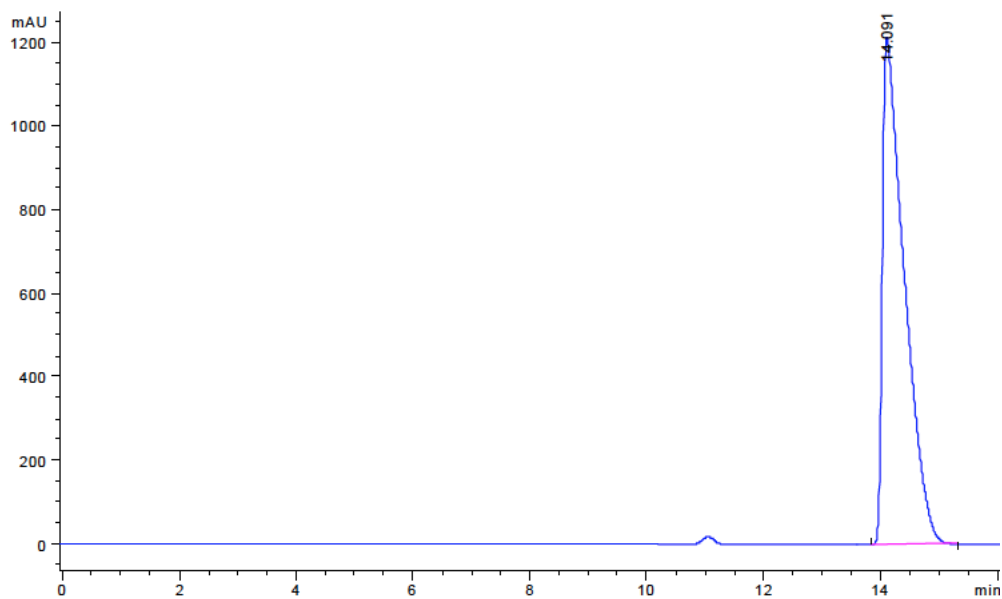

**Following the general procedure A.** HPLC analysis of the crude residue indicated a ratio indole/**18o** of > 1:99 and an enantiomeric excess of (+) **3** [Chiralpak IB column, 250 bar, T = 15 °C, *n*-Hexane/*i*-PrOH = 98:2, 0.8 mL/min,  $\lambda$  = 230 nm,  $t_R$  = 21.993 min and  $t_R$  = 26.590 min].

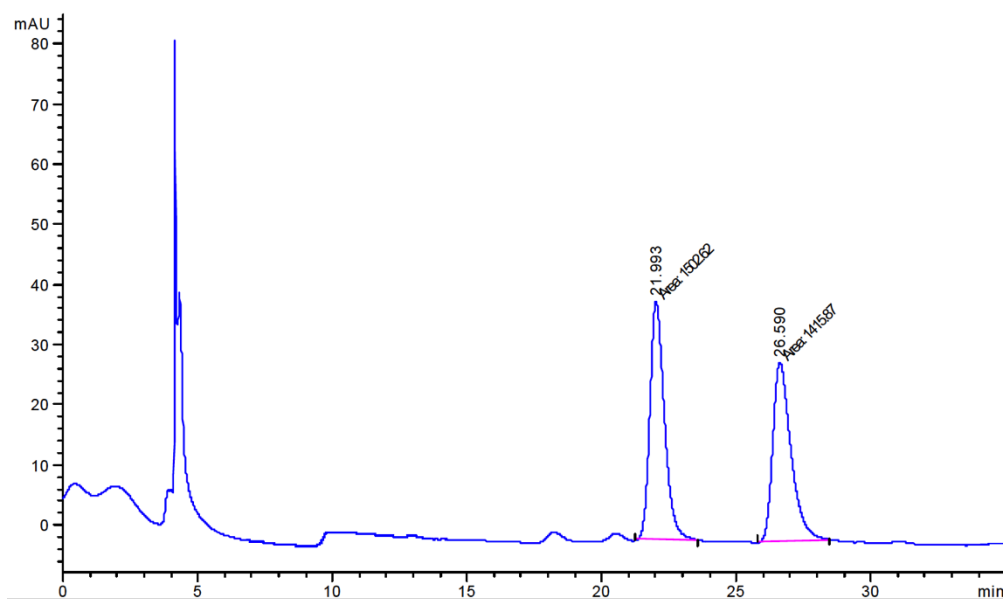

| Peak# | RetentionTime<br>min | Rel.Area<br>% |
|-------|----------------------|---------------|
| 1     | 21.993               | 51.4863       |
| 2     | 26.59                | 48.5137       |

**Following the general procedure B.** HPLC analysis of the crude residue indicated a ratio indole/**18o** of > 1:99 and an enantiomeric excess of (-) **36** [Chiralpak IB column, 250 bar, T = 15 °C, *n*-Hexane/*i*-PrOH = 98:2, 0.8 mL/min,  $\lambda$  = 230 nm,  $t_R$  = 22.720 min and  $t_R$  = 27.274 min].

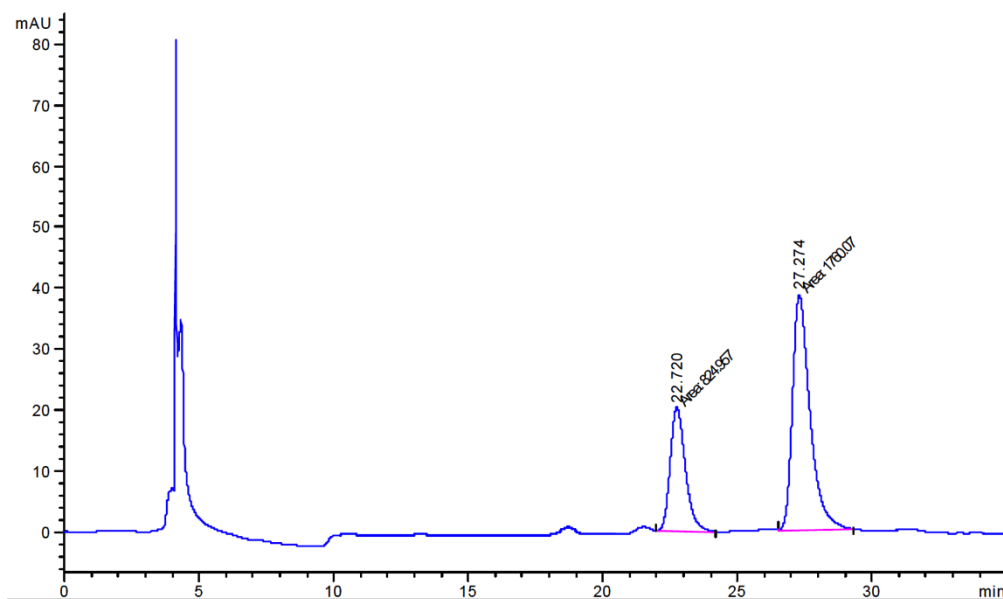

| Peak# | RetentionTime<br>min | Rel.Area<br>% |
|-------|----------------------|---------------|
| 1     | 22.72                | 31.9129       |
| 2     | 27.274               | 68.0871       |



**Following the general procedure C.** HPLC analysis of the crude residue detected traces of **18o** and an enantiomeric excess of 0 [Chiralpak IB column, 250 bar, T = 15 °C, *n*-Hexane/*i*-PrOH = 98:2, 0.8 mL/min,  $\lambda$  = 230 nm,  $t_R$  = 22.396 min and  $t_R$  = 27.132 min]. *Presence of by-products.*

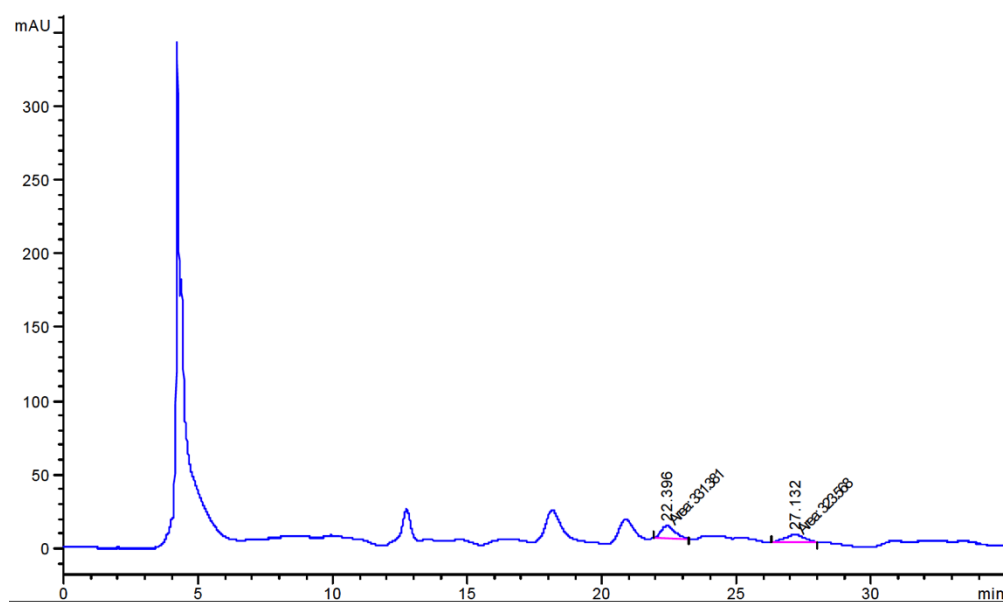

| Peak# | RetentionTime | Rel.Area |
|-------|---------------|----------|
|       | min           | %        |
| 1     | 22.396        | 50.5964  |
| 2     | 27.132        | 49.4036  |

**Following the general procedure D.** HPLC analysis of the crude residue indicated a ratio indole/**18o** of > 1:99 and an enantiomeric excess of (+) 61 [Chiralpak IB column, 250 bar, T = 15 °C, *n*-Hexane/*i*-PrOH = 98:2, 0.8 mL/min,  $\lambda$  = 230 nm,  $t_R$  = 21.786 min and  $t_R$  = 26.369 min].

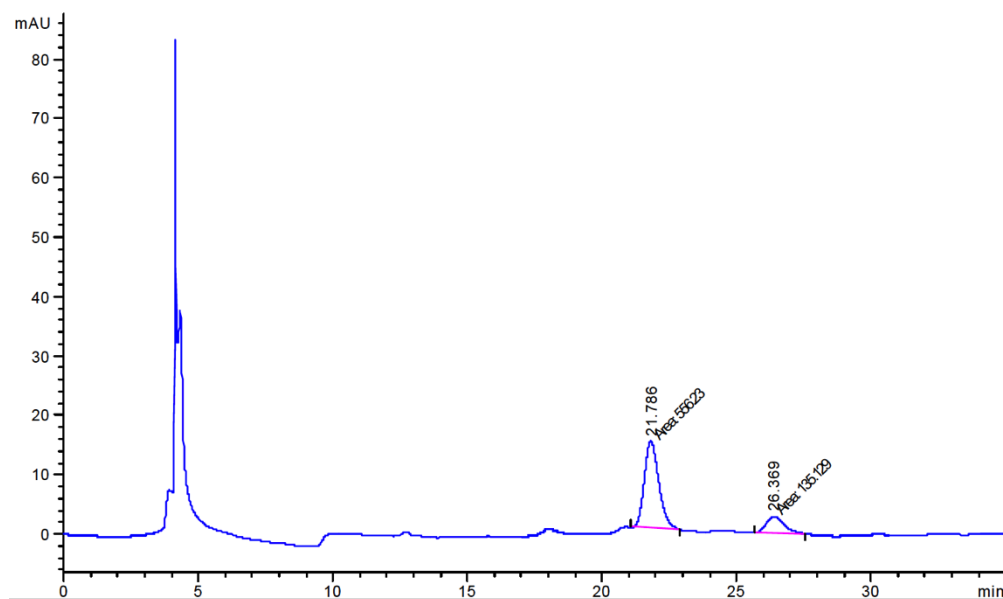

| Peak# | RetentionTime | Rel.Area |
|-------|---------------|----------|
|       | min           | %        |
| 1     | 21.786        | 80.4546  |
| 2     | 26.369        | 19.5454  |

**Following the general procedure E.** HPLC analysis of the crude residue detected traces of **18o** and an enantiomeric excess of (-) **4** [Chiralpak IB column, 250 bar, T = 15 °C, *n*-Hexane/*i*-PrOH = 98:2, 0.8 mL/min,  $\lambda$  = 230 nm,  $t_R$  = 23.152 min and  $t_R$  = 27.804 min]. *Presence of by-products.*

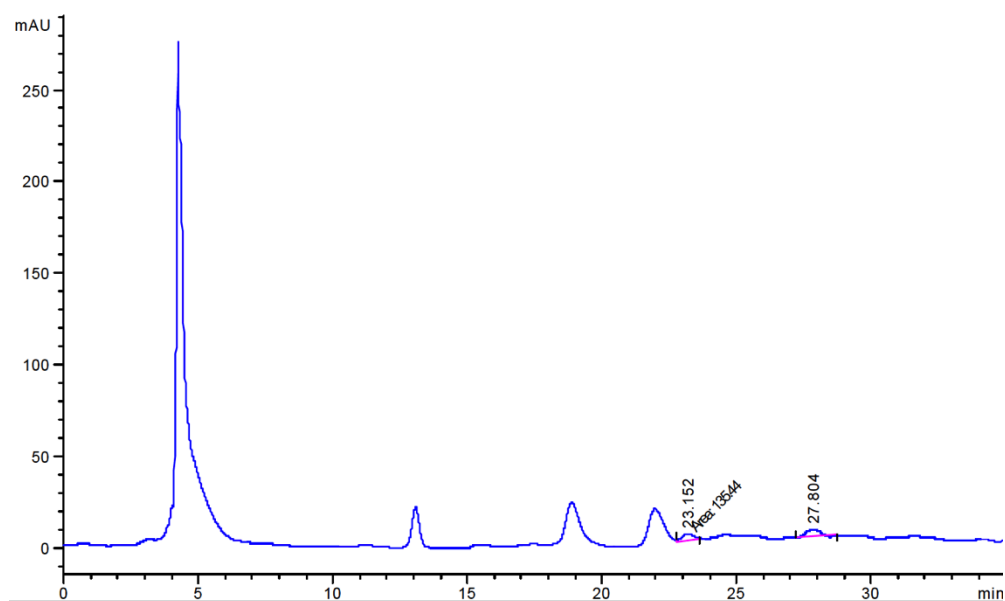

| Peak# | RetentionTime<br>min | Rel. Area<br>% |
|-------|----------------------|----------------|
| 1     | 23.152               | 47.8492        |
| 2     | 27.804               | 52.1508        |

## References

- 1 Della Ciana, L.; Hamachi, I.; Meyer, T. **1989**, *54*, 1731-1735.
- 2 Kumar, P.; Shaikh, K. I.; Jørgensen, A. S.; Kumar, S.; Nielsen, P. *J. Org. Chem.* **2012**, *77*, 9562-9573.
- 3 García-Fernández, A.; Megens, R. P.; Villarino, L.; Roelfes, J. *Am. Chem. Soc.* **2016**, *138*, 16308-16314.
- 4 Charles, M. D.; Schultz, P.; Buchwald, S. L. *Org. Lett.* **2005**, *7*, 3965-3968.
